# Supplementary material
Source: PubMed Central journal article supplement (PMC3478606)

Figure S3A Host response to each *Lactobacillus* mono-association (3d)

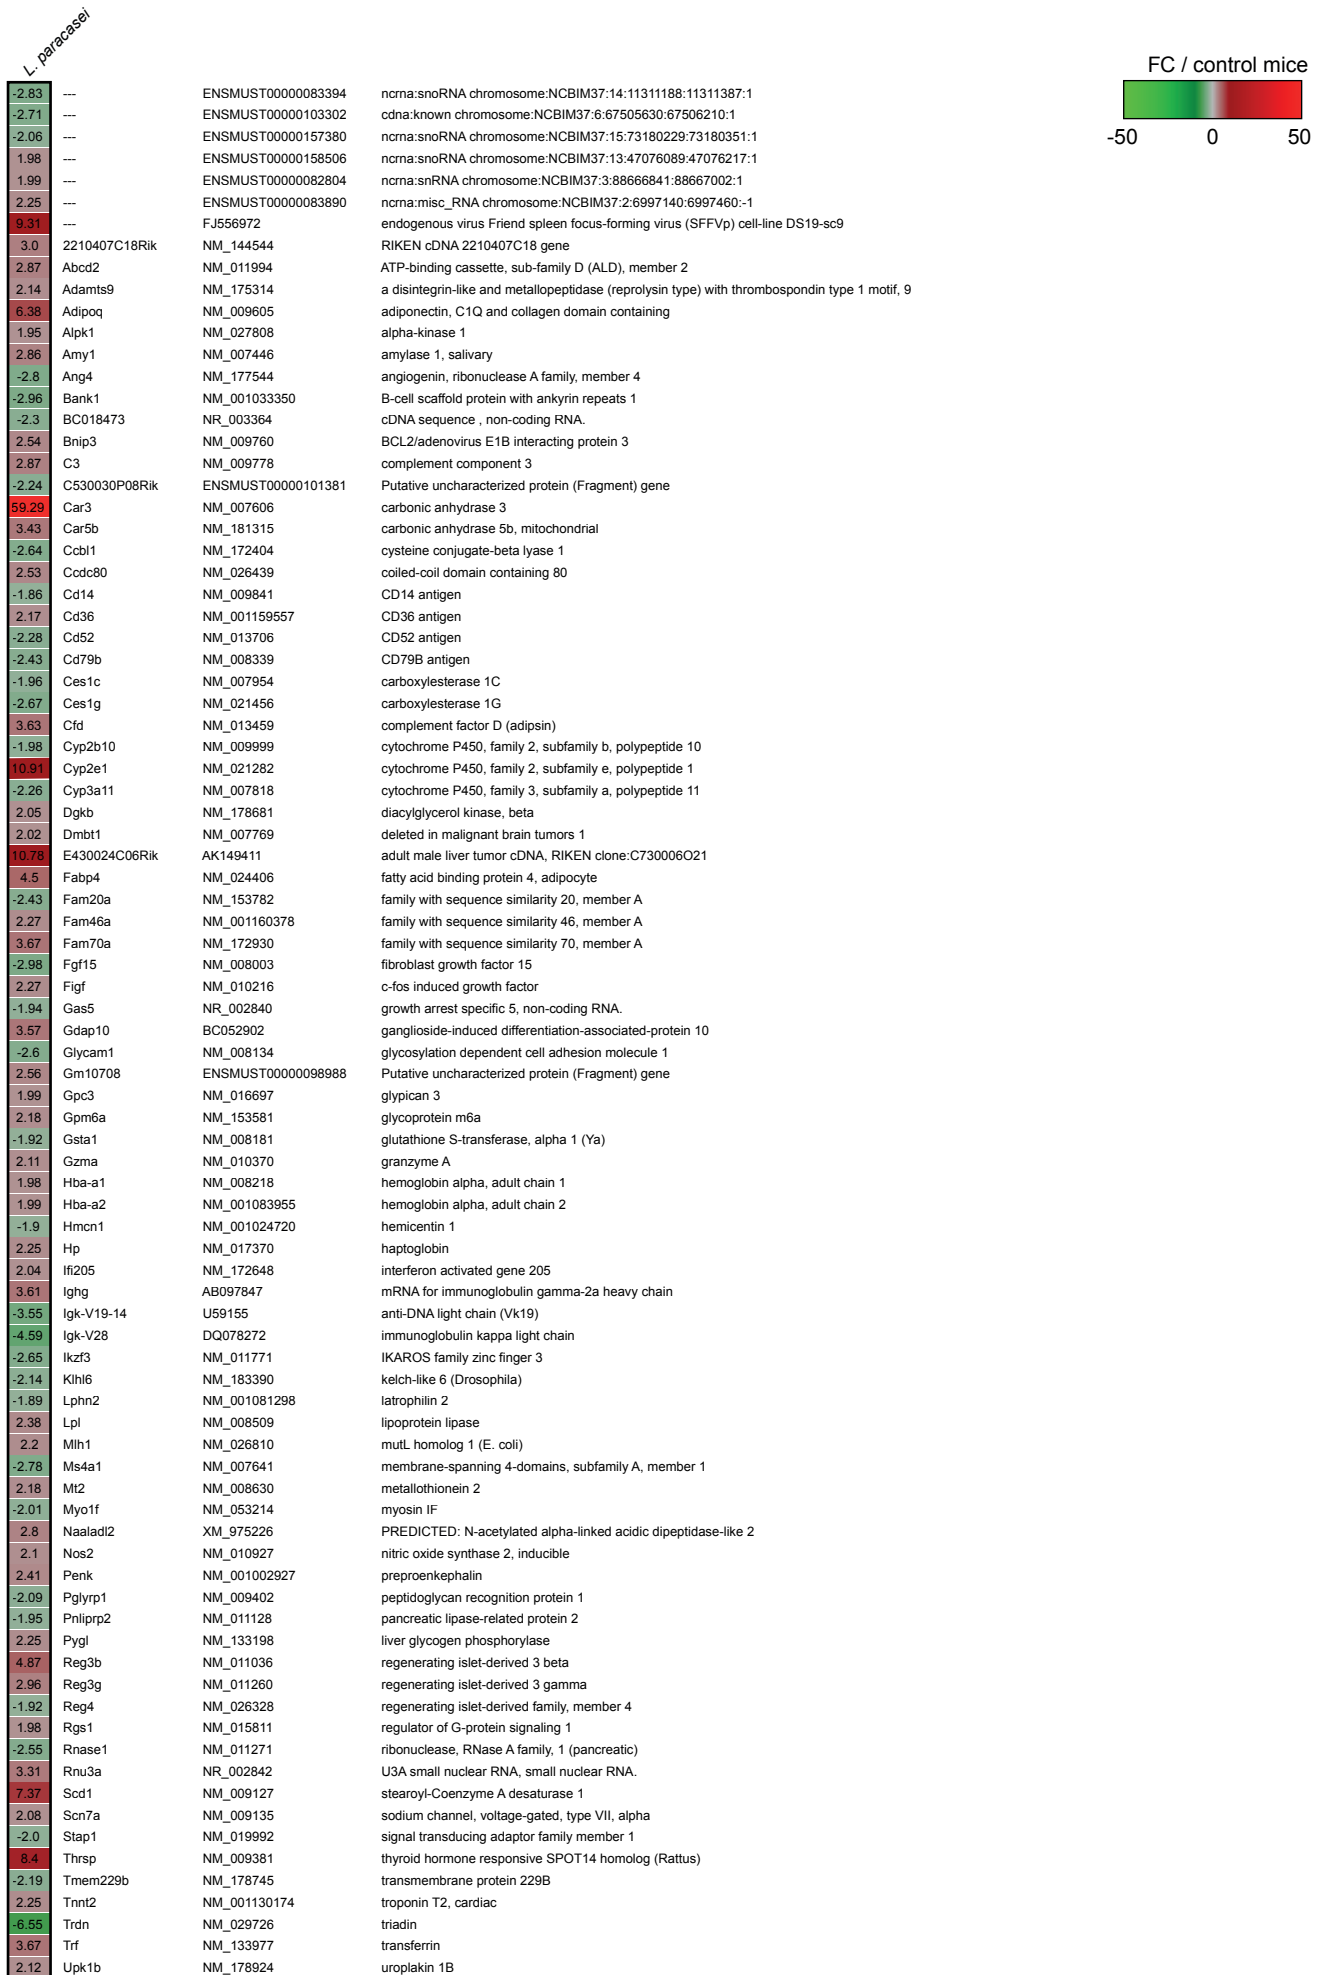

Figure S3A -Host response to each *Lactobacillus* mono-association (3d)

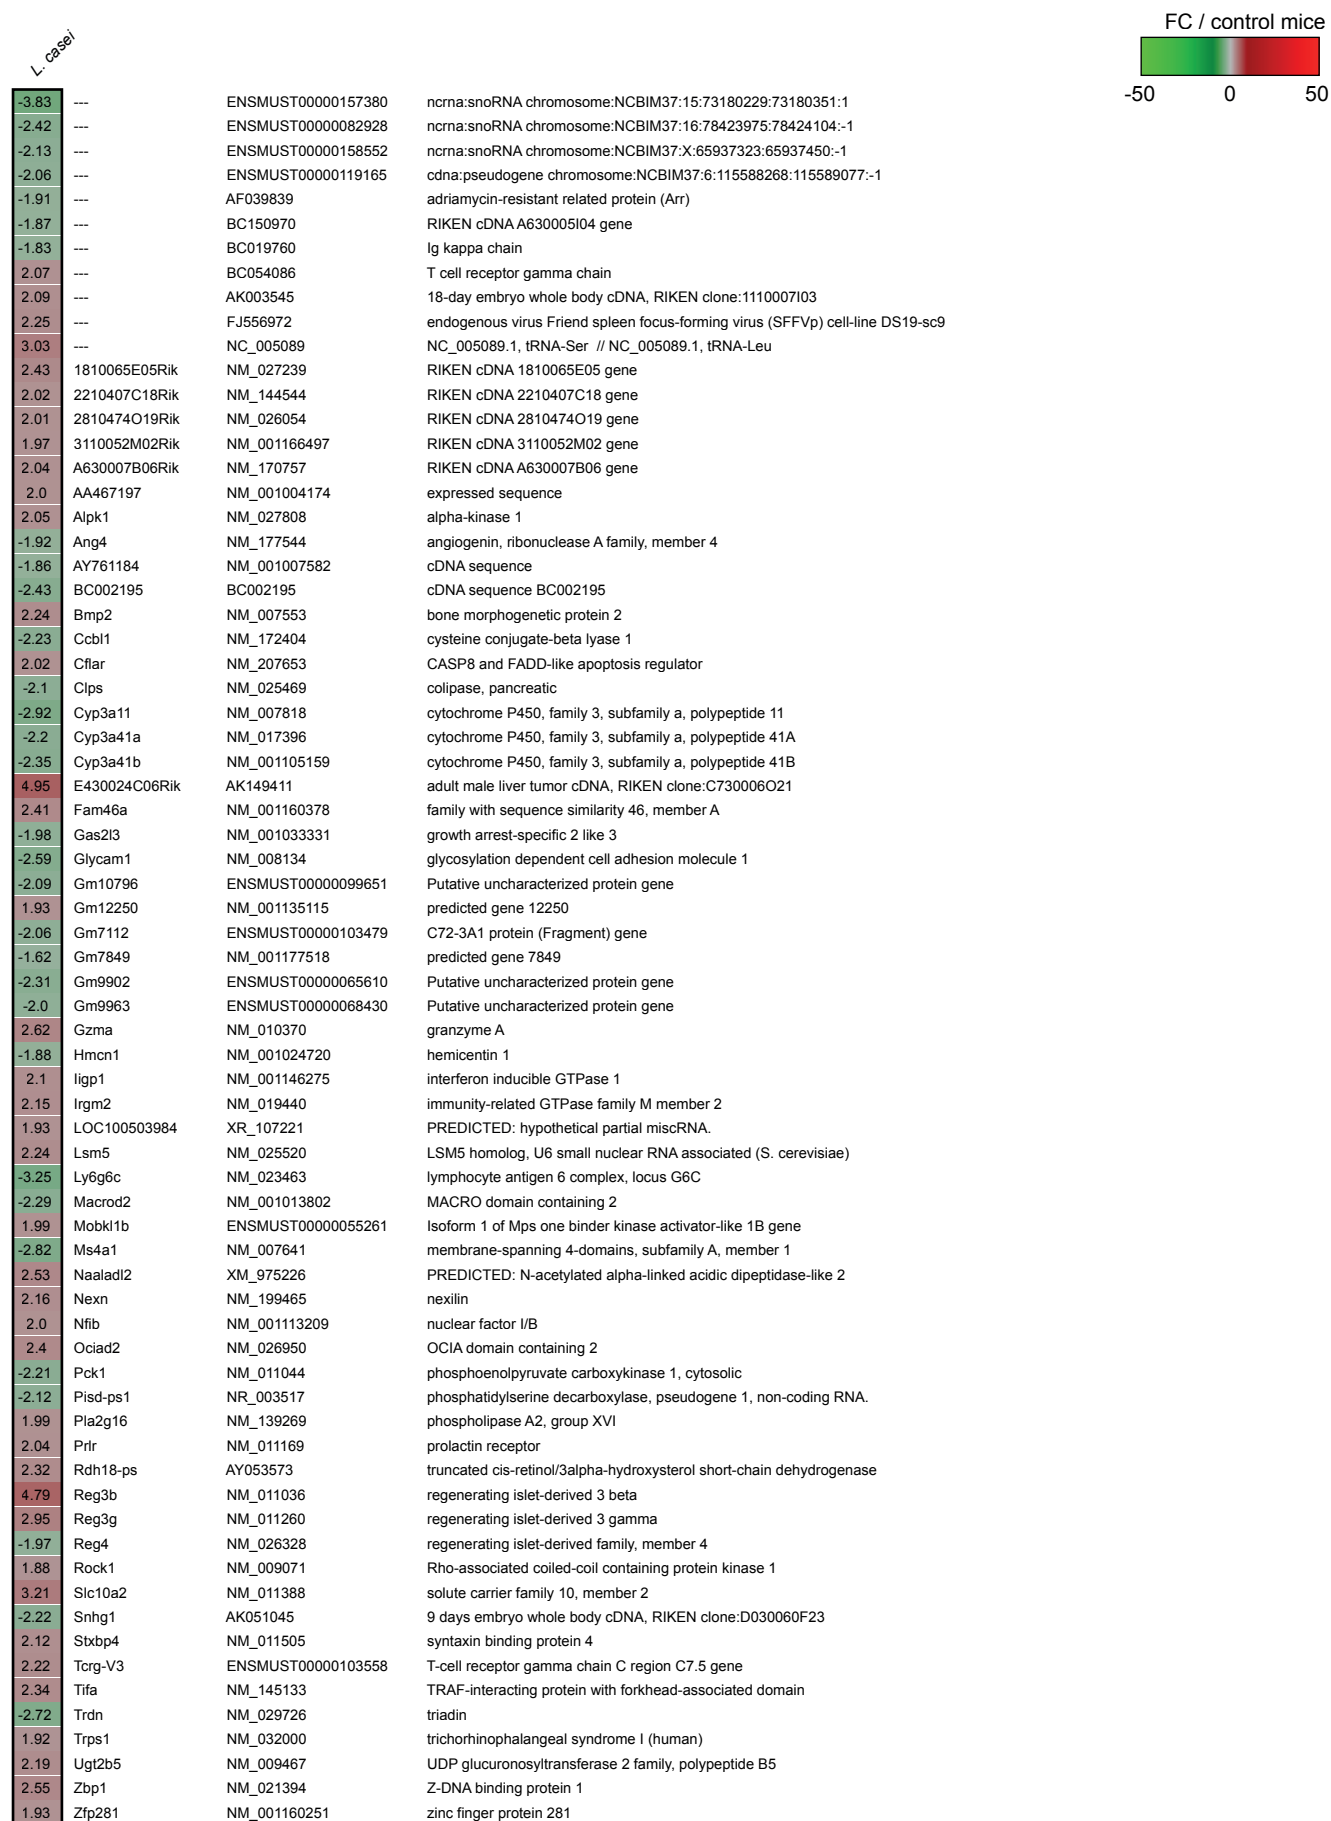

Figure S3B -Host response to *Lm* infection (24h)

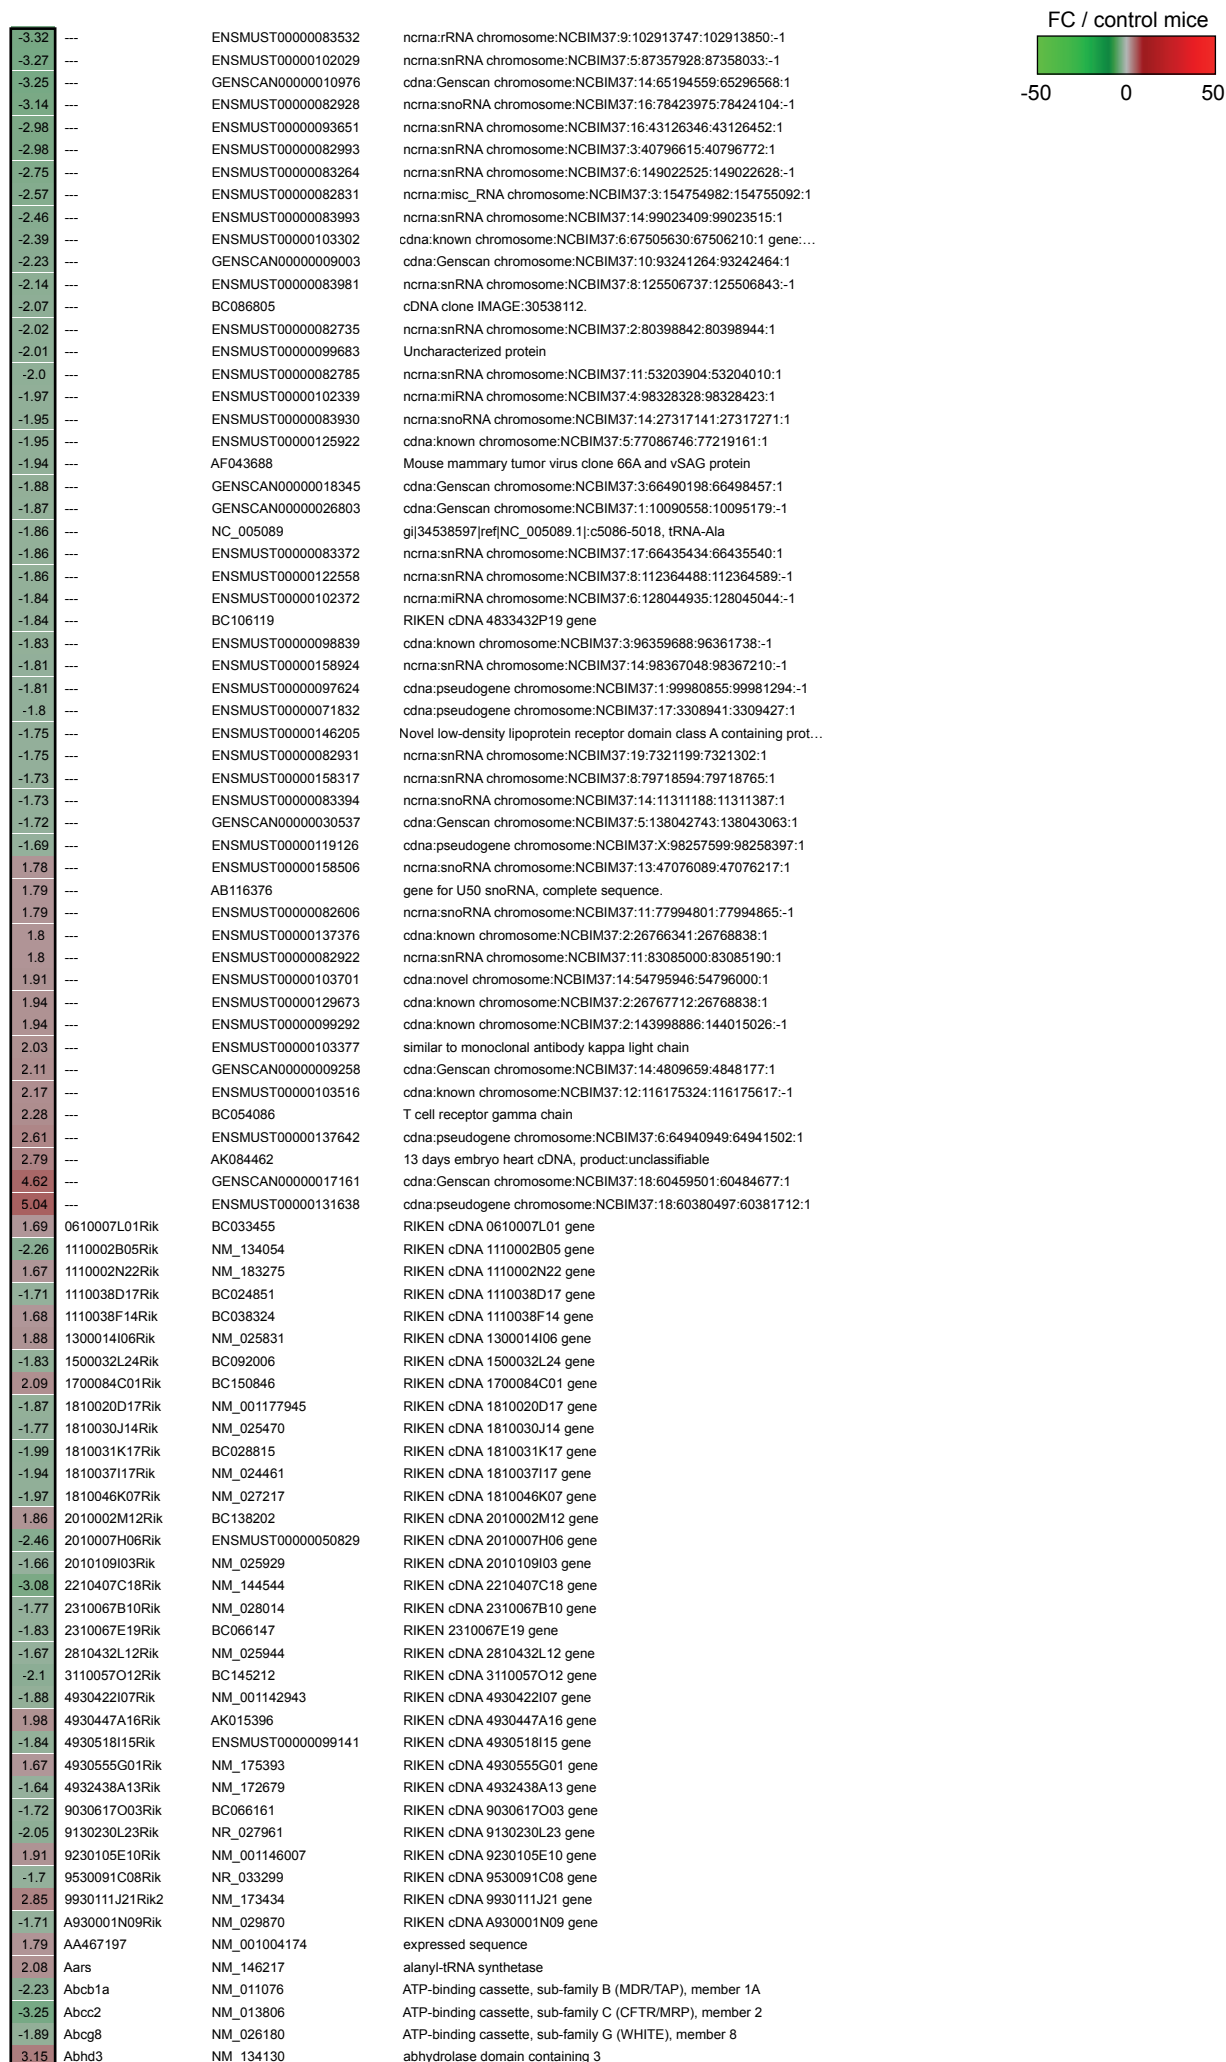

|        |               |                    |                                                                             |
|--------|---------------|--------------------|-----------------------------------------------------------------------------|
| -1.83  | Abp1          | NM_029638          | amiloride binding protein 1 (amine oxidase, copper-containing)              |
| -1.92  | Acbd4         | NM_025988          | acyl-Coenzyme A binding domain containing 4, transcript variant 1           |
| -1.86  | Acer1         | NM_175731          | alkaline ceramidase 1                                                       |
| 1.93   | Acer3         | NM_025408          | alkaline ceramidase 3                                                       |
| -5.08  | Acot12        | NM_028790          | acyl-CoA thioesterase 12                                                    |
| -1.63  | Acot4         | NM_134247          | acyl-CoA thioesterase 4                                                     |
| -1.88  | Acp6          | NM_019800          | acid phosphatase 6, lysophosphatidic                                        |
| -2.03  | AcpI2         | NM_153420          | acid phosphatase-like 2                                                     |
| -2.31  | Acsf2         | NM_153807          | acyl-CoA synthetase family member 2                                         |
| -1.83  | AcsI1         | NM_007981          | acyl-CoA synthetase long-chain family member 1                              |
| -1.99  | AcsI3         | NM_028817          | acyl-CoA synthetase long-chain family member 3, transcript variant 1        |
| -1.66  | Acsm3         | NM_016870          | acyl-CoA synthetase medium-chain family member 3, transcript variant 1      |
| -1.93  | Acss2         | NM_019811          | acyl-CoA synthetase short-chain family member 2                             |
| -1.81  | Actg2         | NM_009610          | actin, gamma 2, smooth muscle, enteric                                      |
| -1.86  | Acvr1c        | NM_001111030       | activin A receptor, type IC, transcript variant 1                           |
| -4.36  | Ada           | NM_007398          | adenosine deaminase                                                         |
| 1.76   | Adams1        | NM_009621          | a disintegrin-like and metallopeptidase with thrombospondin type 1 motif, 1 |
| 2.67   | Adams3        | NM_177872          | a disintegrin-like and metallopeptidase with thrombospondin type 1 motif, 3 |
| 2.33   | Adams9        | NM_175314          | a disintegrin-like and metallopeptidase with thrombospondin type 1 motif, 9 |
| 2.14   | Adar          | NM_001038587       | adenosine deaminase, RNA-specific, transcript variant 2                     |
| -2.11  | Adck3         | NM_023341          | aarF domain containing kinase 3, mitochondrial                              |
| -3.1   | Adh1          | NM_007409          | alcohol dehydrogenase 1 (class I)                                           |
| -2.63  | Adh4          | NM_011996          | alcohol dehydrogenase 4 (class II), pi polypeptide                          |
| -31... | Adh6a         | NM_026945          | alcohol dehydrogenase 6A (class V)                                          |
| -2.02  | Adipor2       | NM_197985          | adiponectin receptor 2                                                      |
| 1.79   | Adm           | NM_009627          | adrenomedullin                                                              |
| -1.72  | Aff1          | NM_001080798       | AF4/FMR2 family, member 1, transcript variant 1                             |
| -2.18  | AI427809      | NR_033139          | expressed sequence , transcript variant 1, non-coding RNA.                  |
| 3.34   | AI607873      | BC150711           | expressed sequence AI607873                                                 |
| -2.01  | Akr1c12       | NM_013777          | aldo-keto reductase family 1, member C12                                    |
| -2.75  | Akr1c13       | NM_013778          | aldo-keto reductase family 1, member C13                                    |
| -1.68  | Akr1c14       | NM_134072          | aldo-keto reductase family 1, member C14                                    |
| -4.92  | Akr1c19       | NM_001013785       | aldo-keto reductase family 1, member C19                                    |
| -2.68  | Akr1e1        | NM_018859          | aldo-keto reductase family 1, member E1                                     |
| 1.9    | Aldh1a3       | NM_053080          | aldehyde dehydrogenase family 1, subfamily A3                               |
| -1.92  | Aldh3a2       | NM_007437          | aldehyde dehydrogenase family 3, subfamily A2                               |
| -2.32  | Aldoc         | NM_009657          | aldolase C, fructose-bisphosphate                                           |
| -1.85  | Alpi          | NM_001081082       | alkaline phosphatase, intestinal                                            |
| 4.49   | Alpk1         | NM_027808          | alpha-kinase 1                                                              |
| 1.77   | Amd1          | NM_009665          | S-adenosylmethionine decarboxylase 1                                        |
| 1.92   | Ampd3         | NM_009667          | adenosine monophosphate deaminase 3                                         |
| -1.98  | Ank3          | NM_146005          | ankyrin 3, epithelial, transcript variant 2                                 |
| -1.85  | Ano10         | NM_133979          | anoctamin 10                                                                |
| 2.59   | Ano3          | NM_001128103       | anoctamin 3, transcript variant 2                                           |
| -1.86  | Ano6          | NM_175344          | anoctamin 6                                                                 |
| 2.23   | Apobec3       | NM_001160415       | apolipoprotein B mRNA editing enzyme, catalytic polypeptide 3               |
| 2.01   | Apol10b       | NM_177820          | apolipoprotein L 10b                                                        |
| 1.82   | Apol6         | NM_028010          | apolipoprotein L 6, transcript variant 1                                    |
| -1.87  | Aqp11         | NM_175105          | aquaporin 11                                                                |
| 1.98   | Aqp4          | NM_009700          | aquaporin 4                                                                 |
| -1.92  | Aqp7          | NM_007473          | aquaporin 7                                                                 |
| 1.85   | Arf2          | NM_007477          | ADP-ribosylation factor 2                                                   |
| -1.83  | Arg2          | NM_009705          | arginase type II                                                            |
| -1.89  | Arhgap18      | NM_176837          | Rho GTPase activating protein 18                                            |
| 2.15   | Arhgap31      | NM_020260          | Rho GTPase activating protein 31                                            |
| 1.74   | Arhgef6       | NM_152801          | Rac/Cdc42 guanine nucleotide exchange factor (GEF) 6                        |
| -1.87  | Arhgef9       | NM_001033329       | CDC42 guanine nucleotide exchange factor (GEF) 9                            |
| -1.82  | Arrb1         | NM_177231          | arrestin, beta 1, transcript variant a                                      |
| 1.78   | Asah1         | NM_019734          | N-acylsphingosine amidohydrolase 1                                          |
| -1.58  | Asah2         | NM_018830          | N-acylsphingosine amidohydrolase 2                                          |
| 5.6    | Asns          | NM_012055          | asparagine synthetase                                                       |
| 1.81   | Atf4          | NM_009716          | activating transcription factor 4                                           |
| -1.76  | Atg14         | NM_172599          | VATG14 autophagy related 14 homolog (S. cerevisiae)                         |
| 2.08   | Atp10b        | NM_176999          | ATPase, class V, type 10B                                                   |
| 1.57   | Atp1a1        | NM_144900          | ATPase, Na+/K+ transporting, alpha 1 polypeptide                            |
| 2.1    | Atp8a1        | NM_001038999       | ATPase, aminophospholipid transporter (APLT), class I, type 8A              |
| -2.04  | B230325K18Rik | ENSMUST00000079... | Putative uncharacterized protein gene:ENSMUSG00000063254                    |
| 5.18   | B3galt5       | NM_033149          | UDP-Gal:betaGlcNAc beta 1,3-galactosyltransferase, polypeptide 5            |
| 1.72   | B3gnt7        | NM_145222          | UDP-GlcNAc:betaGal beta-1,3-N-acetylglucosaminyltransferase 7               |
| 2.31   | B4galt1       | NM_022305          | UDP-Gal:betaGlcNAc beta 1,4- galactosyltransferase, polypeptide 1           |
| 1.76   | B4galt5       | NM_019835          | UDP-Gal:betaGlcNAc beta 1,4-galactosyltransferase, polypeptide 5            |
| -1.66  | B4galt6       | NM_019737          | UDP-Gal:betaGlcNAc beta 1,4-galactosyltransferase, polypeptide 6            |
| -2.18  | Bank1         | NM_001033350       | B-cell scaffold protein with ankyrin repeats 1                              |
| 2.85   | Batf2         | NM_028967          | basic leucine zipper transcription factor, ATF-like 2                       |
| 2.4    | BC006779      | NM_183162          | cDNA sequence                                                               |
| -1.83  | BC016579      | NM_145389          | cDNA sequence,                                                              |
| -8.4   | BC018473      | NR_003364          | cDNA sequence , non-coding RNA.                                             |
| 1.86   | BC025446      | BC025446           | cDNA sequence BC025446                                                      |
| -1.68  | BC031353      | NM_001113283       | cDNA sequence , transcript variant 1                                        |
| 1.73   | BC057079      | NM_001081184       | cDNA sequence                                                               |
| -1.93  | Bcas1         | NM_029815          | breast carcinoma amplified sequence 1, transcript variant 1                 |
| -2.04  | Bche          | NM_009738          | butyrylcholinesterase                                                       |
| -1.78  | Bckdxb        | NM_199195          | branched chain ketoacid dehydrogenase E1, beta polypeptide, mitochondrial   |
| 1.72   | Bcl2l15       | NM_001142959       | BCL2-like 15, transcript variant 1                                          |
| 2.17   | Bcl3          | NM_033601          | B-cell leukemia/lymphoma 3                                                  |
| 1.72   | Bcl6          | NM_009744          | B-cell leukemia/lymphoma 6                                                  |
| 2.71   | Bmp5          | NM_007555          | bone morphogenetic protein 5                                                |
| -2.09  | Bmp8b         | NM_007559          | bone morphogenetic protein 8b                                               |
| 2.06   | Brip1         | NM_178309          | BRCA1 interacting protein C-terminal helicase 1                             |
| -2.14  | Bst1          | NM_009763          | bone marrow stromal cell antigen 1                                          |
| -2.0   | Btd           | NM_025295          | biotinidase                                                                 |
| -1.79  | C2cd2         | NM_174847          | C2 calcium-dependent domain containing 2                                    |

|        |               |                    |                                                                               |
|--------|---------------|--------------------|-------------------------------------------------------------------------------|
| -6.05  | C530030P08Rik | ENSMUST00000101381 | Putative uncharacterized protein (Fragment) gene:ENSMUSG00000073057           |
| -1.67  | Cables1       | NM_001146287       | CDK5 and Abl enzyme substrate 1, transcript variant 1                         |
| 1.72   | Cacybp        | NM_009786          | calcyclin binding protein                                                     |
| -1.75  | Car13         | NM_024495          | carbonic anhydrase 13                                                         |
| 1.89   | Car2          | NM_009801          | carbonic anhydrase 2                                                          |
| 2.54   | Car3          | NM_007606          | carbonic anhydrase 3                                                          |
| -1.7   | Car8          | NM_007592          | carbonic anhydrase 8                                                          |
| 1.68   | Card14        | NM_130886          | caspace recruitment domain family, member 14                                  |
| 2.51   | Cars          | NM_013742          | cysteinyl-tRNA synthetase                                                     |
| 3.55   | Casp4         | NM_007609          | caspace 4, apoptosis-related cysteine peptidase                               |
| -1.93  | Cbr1          | NM_007620          | carbonyl reductase 1                                                          |
| -4.8   | Cobl1         | NM_172404          | cysteine conjugate-beta lyase 1                                               |
| 1.81   | Ccdc86        | NM_023731          | coiled-coil domain containing 86                                              |
| 1.71   | Cck           | NM_031161          | cholecystokinin                                                               |
| 2.27   | Ccl11         | NM_011330          | chemokine (C-C motif) ligand 11                                               |
| 4.35   | Ccl12         | NM_011331          | chemokine (C-C motif) ligand 12                                               |
| 3.88   | Ccl2          | NM_011333          | chemokine (C-C motif) ligand 2                                                |
| 2.93   | Ccnd1         | NM_007631          | cyclin D1                                                                     |
| -1.78  | Ccng2         | NM_007635          | cyclin G2                                                                     |
| 1.96   | Ccnjl         | NM_001045530       | cyclin J-like                                                                 |
| -1.74  | Ccr1          | NM_145700          | chemokine (C-C motif) receptor-like 1                                         |
| -1.94  | Cd151         | NM_009842          | CD151 antigen, transcript variant 1                                           |
| 4.83   | Cd274         | NM_021893          | CD274 antigen                                                                 |
| 1.88   | Cd36          | NM_001159557       | CD36 antigen, transcript variant 4                                            |
| 2.91   | Cd38          | NM_007646          | CD38 antigen                                                                  |
| -2.15  | Cd55          | NM_010016          | CD55 antigen                                                                  |
| -1.67  | Cd82          | NM_007656          | CD82 antigen, transcript variant 1                                            |
| -1.66  | Cdc14b        | NM_172587          | CDC14 cell division cycle 14 homolog B (S. cerevisiae), transcript variant 1  |
| 2.05   | Cdc45         | NM_009862          | cell division cycle 45 homolog (S. cerevisiae), transcript variant 1          |
| 3.4    | Cdk5          | NM_001024624       | cyclin-dependent kinase-like 5                                                |
| -2.23  | Cdkn1b        | NM_009875          | cyclin-dependent kinase inhibitor 1B                                          |
| -2.42  | Ceacam18      | NM_028236          | carcinoembryonic antigen-related cell adhesion molecule 18                    |
| 2.22   | Cebpd         | NM_007679          | CCAAT/enhancer binding protein (C/EBP), delta                                 |
| 1.82   | Cep78         | NM_198019          | centrosomal protein 78                                                        |
| -2.23  | Ces1c         | NM_007954          | carboxylesterase 1C                                                           |
| -1.93  | Ces1d         | NM_053200          | carboxylesterase 1D                                                           |
| -2.07  | Ces1e         | NM_133660          | carboxylesterase 1E                                                           |
| -3.84  | Ces1g         | NM_021456          | carboxylesterase 1G                                                           |
| -1.76  | Ces2a         | NM_133960          | carboxylesterase 2A, transcript variant 1                                     |
| -2.03  | Ces2c         | NM_145603          | carboxylesterase 2C                                                           |
| -1.97  | Ces2d-ps      | NR_033726          | carboxylesterase 2D, pseudogene, non-coding RNA.                              |
| 1.65   | Chac1         | NM_026929          | ChaC, cation transport regulator-like 1 (E. coli)                             |
| 1.86   | Chordc1       | NM_025844          | cysteine and histidine-rich domain (CHORD)-containing, zinc-binding protein 1 |
| 5.13   | Chst4         | NM_011998          | carbohydrate (chondroitin 6/keratan) sulfotransferase 4                       |
| 1.92   | Ciita         | NM_007575          | class II transactivator                                                       |
| -2.48  | Cir1          | NM_025854          | corepressor interacting with RBPJ, 1                                          |
| 2.47   | Cks2          | NM_025415          | CDC28 protein kinase regulatory subunit 2                                     |
| 4.57   | Clca1         | NM_009899          | chloride channel calcium activated 1                                          |
| 1.8    | Clca2         | NM_030601          | chloride channel calcium activated 2                                          |
| -2.18  | Clca6         | NM_207208          | chloride channel calcium activated 6                                          |
| -1.83  | Clcn5         | NM_016691          | chloride channel 5                                                            |
| -1.91  | Cldn3         | NM_009902          | claudin 3                                                                     |
| -2.36  | Cldn4         | NM_009903          | claudin 4                                                                     |
| -1.9   | Cldn8         | NM_018778          | claudin 8                                                                     |
| -1.76  | Clec2e        | NM_153506          | C-type lectin domain family 2, member e                                       |
| 2.24   | Clec2j        | ENSMUST00000032517 | hypothetical protein gene:ENSMUSG00000030363                                  |
| 1.68   | Clec4a3       | NM_153197          | C-type lectin domain family 4, member a3                                      |
| -2.47  | Clec9a        | NM_172732          | C-type lectin domain family 9, member a                                       |
| -1.9   | Clps          | NM_025469          | colipase, pancreatic                                                          |
| -1.84  | Col12a1       | NM_007730          | collagen, type XII, alpha 1                                                   |
| 1.73   | Copg          | NM_017477          | coatamer protein complex, subunit gamma, transcript variant 1                 |
| 2.05   | Cp            | NM_001042611       | ceruloplasmin, transcript variant 1                                           |
| -1.83  | Cpm           | NM_027468          | carboxypeptidase M                                                            |
| -2.22  | Cspp1         | NM_026493          | centrosome and spindle pole associated protein 1                              |
| 2.39   | Csprs         | NM_033616          | component of Sp100-rs                                                         |
| 1.76   | Cttnal1       | NM_018761          | catenin (cadherin associated protein), alpha-like 1                           |
| -1.72  | Ctns          | NM_031251          | cystinosis, nephropathic                                                      |
| 2.58   | Ctps          | NM_016748          | cytidine 5'-triphosphate synthase                                             |
| -1.97  | Cubn          | NM_001081084       | cubilin (intrinsic factor-cobalamin receptor)                                 |
| 7.56   | Cxcl10        | NM_021274          | chemokine (C-X-C motif) ligand 10                                             |
| 5.89   | Cxcl9         | NM_008599          | chemokine (C-X-C motif) ligand 9                                              |
| -1.65  | Cyb5b         | NM_025558          | cytochrome b5 type B, nuclear gene encoding mitochondrial protein             |
| -1.96  | Cyb5r3        | NM_029787          | cytochrome b5 reductase 3                                                     |
| -1.75  | Cyp2b10       | NM_009999          | cytochrome P450, family 2, subfamily b, polypeptide 10, transcript variant 2  |
| -2.21  | Cyp2c40       | NM_010004          | cytochrome P450, family 2, subfamily c, polypeptide 40                        |
| -11.00 | Cyp2c55       | NM_028089          | cytochrome P450, family 2, subfamily c, polypeptide 55                        |
| -3.36  | Cyp2c65       | NM_028191          | cytochrome P450, family 2, subfamily c, polypeptide 65                        |
| -1.96  | Cyp2c66       | NM_001011707       | cytochrome P450, family 2, subfamily c, polypeptide 66                        |
| -2.18  | Cyp2c68       | NM_001039555       | cytochrome P450, family 2, subfamily c, polypeptide 68                        |
| 3.52   | Cyp2j11-ps    | NM_001004141       | cytochrome P450, family 2, subfamily j, polypeptide 11, pseudogene            |
| -1.68  | Cyp2j6        | NM_010008          | cytochrome P450, family 2, subfamily j, polypeptide 6                         |
| -1.84  | Cyp2j9        | NM_028979          | cytochrome P450, family 2, subfamily j, polypeptide 9                         |
| -3.17  | Cyp2s1        | NM_028775          | cytochrome P450, family 2, subfamily s, polypeptide 1                         |
| -3.43  | Cyp3a11       | NM_007818          | cytochrome P450, family 3, subfamily a, polypeptide 11                        |
| -6.81  | Cyp3a25       | NM_019792          | cytochrome P450, family 3, subfamily a, polypeptide 25, transcript variant 1  |
| -2.71  | Cyp3a41a      | NM_017396          | cytochrome P450, family 3, subfamily a, polypeptide 41A                       |
| -2.72  | Cyp3a41b      | NM_001105159       | cytochrome P450, family 3, subfamily a, polypeptide 41B                       |
| -2.64  | Cyp3a44       | NM_177380          | cytochrome P450, family 3, subfamily a, polypeptide 44                        |
| -2.14  | Cyp4f16       | NM_024442          | cytochrome P450, family 4, subfamily f, polypeptide 16                        |
| -2.65  | Cyp51         | NM_020010          | cytochrome P450, family 51                                                    |
| -1.88  | Cytip         | NM_139200          | cytohesin 1 interacting protein                                               |
| 5.9    | D14Ert668e    | NM_199015          | DNA segment, Chr 14, ERATO Doi 668, expressed                                 |

|       |                    |                    |                                                                        |
|-------|--------------------|--------------------|------------------------------------------------------------------------|
| 1.85  | D17H6S56E-5        | L78788             | solitary LTR and proviral envelope protein (G7e) mRNA                  |
| 2.8   | D5Erttd579e        | NM_001081232       | DNA segment, Chr 5, ERATO Doi 579, expressed                           |
| 2.17  | Daxx               | NM_007829          | Fas death domain-associated protein                                    |
| -2.03 | Dclk1              | NM_019978          | doublecortin-like kinase 1, transcript variant 1                       |
| 2.29  | Dcp2               | NM_027490          | DCP2 decapping enzyme homolog (S. cerevisiae)                          |
| 1.84  | Dctn6              | NM_011722          | dynactin 6                                                             |
| -2.11 | Dcun1d1            | NM_033623          | DCN1, defective in cullin neddylation 1 (S. cerevisiae)                |
| -2.73 | Ddc                | NM_001190448       | dopa decarboxylase, transcript variant 1                               |
| 1.83  | Ddx58              | NM_172689          | DEAD (Asp-Glu-Ala-Asp) box polypeptide 58                              |
| 3.22  | Ddx60              | NM_001081215       | DEAD (Asp-Glu-Ala-Asp) box polypeptide 60                              |
| 1.74  | Deb1               | NM_026794          | differentially expressed in B16F10 1                                   |
| -2.53 | Dfna5              | NM_018769          | deafness, autosomal dominant 5 (human)                                 |
| -1.75 | Dgkb               | NM_178681          | diacylglycerol kinase, beta                                            |
| -1.79 | Dhcr24             | NM_053272          | 24-dehydrocholesterol reductase                                        |
| -1.95 | Dhcr7              | NM_007856          | 7-dehydrocholesterol reductase                                         |
| -1.8  | Dhrs3              | NM_011303          | dehydrogenase/reductase (SDR family) member 3, transcript variant 1    |
| 4.93  | Dhx58              | NM_030150          | DEXH (Asp-Glu-X-His) box polypeptide 58                                |
| -1.74 | Dirc2              | NM_153550          | disrupted in renal carcinoma 2 (human)                                 |
| 5.07  | Dmbt1              | NM_007769          | deleted in malignant brain tumors 1                                    |
| -1.94 | Dnajb3             | NM_008299          | DnaJ (Hsp40) homolog, subfamily B, member 3                            |
| -1.86 | Dpep1              | NM_007876          | dipeptidase 1 (renal)                                                  |
| -1.71 | Dpysl2             | NM_009955          | dihydropyrimidinase-like 2                                             |
| 2.03  | Dtx3l              | NM_001013371       | deltex 3-like (Drosophila)                                             |
| 4.76  | Duox2              | NM_177610          | dual oxidase 2                                                         |
| 4.68  | Duoxa2             | NM_025777          | dual oxidase maturation factor 2                                       |
| -1.84 | Dusp16             | NM_130447          | dual specificity phosphatase 16, transcript variant A1                 |
| 1.98  | Dusp6              | NM_026268          | dual specificity phosphatase 6                                         |
| 1.8   | E2f3               | NM_010093          | E2F transcription factor 3                                             |
| 28.95 | E430024C06Rik      | AK149411           | adult male liver tumor cDNA                                            |
| -1.76 | Ebpl               | NM_026598          | emopamil binding protein-like                                          |
| -2.44 | Edn1               | NM_010104          | endothelin 1                                                           |
| 2.61  | Eef1e1             | NM_025380          | eukaryotic translation elongation factor 1 epsilon 1                   |
| -1.7  | Eef2k              | NM_007908          | eukaryotic elongation factor-2 kinase                                  |
| -1.74 | Efcab4b            | NM_001033464       | EF-hand calcium binding domain 4B                                      |
| -3.12 | Egln3              | NM_028133          | EGL nine homolog 3 (C. elegans)                                        |
| 1.79  | Ehf                | NM_007914          | ets homologous factor                                                  |
| 2.09  | Eif1a              | NM_010120          | eukaryotic translation initiation factor 1A                            |
| 2.83  | Eif2ak2            | NM_011163          | eukaryotic translation initiation factor 2-alpha kinase 2              |
| 2.7   | Eif4ebp3           | NM_201256          | eukaryotic translation initiation factor 4E binding protein 3          |
| 1.76  | Eif3               | NM_001163131       | E74-like factor 3, transcript variant 1                                |
| -1.77 | Elmod3             | NM_144917          | ELMO/CED-12 domain containing 3                                        |
| -2.22 | Elovl5             | NM_134255          | ELOVL family member 5, elongation of long chain fatty acids (yeast)    |
| -2.53 | Enpp3              | NM_134005          | ectonucleotide pyrophosphatase/phosphodiesterase 3                     |
| 2.6   | ENSMUSG00000006... | NM_001029930       | predicted gene,                                                        |
| -1.76 | Entpd4             | NM_026174          | ectonucleoside triphosphate diphosphohydrolase 4                       |
| -2.72 | Entpd5             | NM_001026214       | ectonucleoside triphosphate diphosphohydrolase 5, transcript variant 2 |
| -1.86 | Epb4.111           | NM_013510          | erythrocyte protein band 4.1-like 1, transcript variant 1              |
| 1.93  | Ereg               | NM_007950          | epiregulin                                                             |
| 2.57  | Esco1              | NM_001081222       | establishment of cohesion 1 homolog 1 (S. cerevisiae)                  |
| 2.02  | Etv6               | NM_007961          | ets variant gene 6 (TEL oncogene)                                      |
| 1.95  | Exo1               | NM_012012          | exonuclease 1                                                          |
| 1.73  | Ext1               | NM_010162          | exostoses (multiple) 1                                                 |
| -1.68 | Fabp6              | NM_008375          | fatty acid binding protein 6, ileal (gastrotropin)                     |
| -1.63 | Fads3              | NM_021890          | fatty acid desaturase 3                                                |
| -1.74 | Fam114a2           | NM_001168668       | family with sequence similarity 114, member A2, transcript variant 1   |
| 1.8   | Fam118b            | BC051180           | family with sequence similarity 118, member B                          |
| -1.66 | Fam126b            | NM_172513          | family with sequence similarity 126, member B                          |
| -2.41 | Fam134b            | NM_001034851       | family with sequence similarity 134, member B, transcript variant 1    |
| -1.82 | Fam198b            | NM_133187          | family with sequence similarity 198, member B                          |
| -2.48 | Fam20a             | NM_153782          | family with sequence similarity 20, member A                           |
| -2.32 | Fam63b             | NM_172772          | family with sequence similarity 63, member B                           |
| 2.17  | Fam82a2            | NM_001033136       | family with sequence similarity 82, member A2                          |
| -2.39 | Fam83b             | BC120577           | family with sequence similarity 83, member B                           |
| -1.74 | Fam84a             | NM_029007          | family with sequence similarity 84, member A                           |
| -2.04 | Fat3               | NM_001080814       | FAT tumor suppressor homolog 3 (Drosophila)                            |
| 2.16  | Fbx17              | BC050864           | cDNA clone IMAGE:6331977.                                              |
| -1.81 | Fchs2              | NM_199012          | FCH and double SH3 domains 2, transcript variant 1                     |
| -1.71 | Fdft1              | NM_010191          | farnesyl diphosphate farnesyl transferase 1                            |
| -2.01 | Fdps               | NM_134469          | farnesyl diphosphate synthetase                                        |
| -5.31 | Fgf15              | NM_008003          | fibroblast growth factor 15                                            |
| -1.89 | Fgf7               | NM_008008          | fibroblast growth factor 7                                             |
| 1.65  | Figf               | NM_010216          | c-fos induced growth factor                                            |
| 4.55  | Fkbp5              | NM_010220          | FK506 binding protein 5                                                |
| -2.32 | Fmo5               | NM_001161765       | flavin containing monooxygenase 5, transcript variant 1                |
| 1.73  | Fndc3b             | NM_173182          | fibronectin type III domain containing 3B                              |
| -2.13 | Foxn3              | BC029185           | forkhead box N3, mRNA (cDNA clone IMAGE:3489687).                      |
| -1.77 | Foxn3              | NM_183186          | forkhead box N3                                                        |
| -3.08 | Foxo3              | ENSMUST00000105502 | Putative uncharacterized protein gene:ENSMUSG00000048756               |
| 1.87  | Fryl               | NM_028194          | furry homolog-like (Drosophila)                                        |
| -1.78 | Fsd1l              | NM_001195284       | fibronectin type III and SPRY domain containing 1-like                 |
| -1.68 | Ftl1 // Ftl1       | NM_010240          | ferritin light chain 1 (Ftl1)                                          |
| 1.95  | Ftsj3              | NM_025310          | FtsJ homolog 3 (E. coli)                                               |
| 9.15  | Fut2               | NM_018876          | fucosyltransferase 2                                                   |
| 1.66  | G530011O06Rik      | NR_029457          | RIKEN cDNA G530011O06 gene, non-coding RNA.                            |
| -2.04 | G6pc               | NM_008061          | glucose-6-phosphatase, catalytic                                       |
| -1.73 | Gab1               | NM_021356          | growth factor receptor bound protein 2-associated protein 1            |
| -3.06 | Gas2l3             | NM_001033331       | growth arrest-specific 2 like 3, transcript variant 1                  |
| 2.47  | Gas5               | NR_002840          | growth arrest specific 5, non-coding RNA.                              |
| -2.2  | Gatsl2             | ENSMUST00000016088 | GATS-like protein 2 gene:ENSMUSG00000015944                            |
| 16.03 | Gbp1               | NM_010259          | guanylate binding protein 1                                            |
| 3.28  | Gbp11              | NM_001039647       | guanylate binding protein 11                                           |
| 5.89  | Gbp2               | NM_010260          | guanylate binding protein 2                                            |

|          |                  |                    |                                                                                |
|----------|------------------|--------------------|--------------------------------------------------------------------------------|
| 3.91     | Gbp3             | NM_018734          | guanylate binding protein 3                                                    |
| 6.88     | Gbp4             | NM_008620          | guanylate binding protein 4                                                    |
| 8.96     | Gbp5             | NM_153564          | guanylate binding protein 5                                                    |
| 12.9     | Gbp6             | NM_145545          | guanylate binding protein 6                                                    |
| 4.4      | Gbp8             | NM_029509          | guanylate-binding protein 8                                                    |
| 2.01     | Gbp9             | NM_172777          | guanylate-binding protein 9                                                    |
| -1.66    | Gcap14           | NM_027045          | granule cell antiserum positive 14, transcript variant 1                       |
| -2.3     | Gch1             | NM_008102          | GTP cyclohydrolase 1                                                           |
| -2.06    | Gclc             | NM_010295          | glutamate-cysteine ligase, catalytic subunit                                   |
| -2.63    | Gclm             | NM_008129          | glutamate-cysteine ligase, modifier subunit                                    |
| 2.82     | Gcnt3            | NM_028087          | glucosaminyl (N-acetyl) transferase 3, mucin type                              |
| -1.77    | Gcom1            | NM_001033208       | GRINL1A complex locus                                                          |
| 2.75     | Gdap10           | BC052902           | ganglioside-induced differentiation-associated-protein 10                      |
| -3.38    | Gde1             | NM_019580          | glycerophosphodiester phosphodiesterase 1                                      |
| 2.37     | Gem              | NM_010276          | GTP binding protein (gene overexpressed in skeletal muscle)                    |
| 3.27     | Gemin6           | NM_026053          | gem (nuclear organelle) associated protein 6                                   |
| -1.82    | Ggt1             | NM_008116          | gamma-glutamyltransferase 1                                                    |
| -1.97    | Gipc2            | NM_016867          | GIPC PDZ domain containing family, member 2                                    |
| -2.19    | Gk5              | NM_177352          | glycerol kinase 5 (putative)                                                   |
| -1.97    | Gls              | NM_001081081       | glutaminase, nuclear gene encoding mitochondrial protein, transcript variant 1 |
| -2.91    | Glycam1          | NM_008134          | glycosylation dependent cell adhesion molecule 1                               |
| -20.3... | Gm10002          | ENSMUST00000070887 | Putative uncharacterized protein gene:ENSMUSG00000056640                       |
| -2.03    | Gm10044          | ENSMUST00000090634 | hypothetical protein gene:ENSMUSG00000072723                                   |
| 2.08     | Gm10406          | NM_001164727       | predicted gene 10406                                                           |
| -1.86    | Gm10430          | ENSMUST00000086909 | Putative uncharacterized protein (Fragment) gene:ENSMUSG00000072855            |
| 1.76     | Gm10589          | ENSMUST00000098096 | Putative uncharacterized protein gene:ENSMUSG00000073861                       |
| -2.62    | Gm10667          | ENSMUST00000098732 | Putative uncharacterized protein gene:ENSMUSG00000074318                       |
| -2.21    | Gm10708          | ENSMUST00000098988 | Putative uncharacterized protein (Fragment) gene:ENSMUSG00000074512            |
| -3.44    | Gm10768          | NR_033472          | predicted gene 10768, non-coding RNA.                                          |
| -2.5     | Gm10786          | ENSMUST00000099550 | Putative uncharacterized protein gene:ENSMUSG00000074917                       |
| 1.81     | Gm10791          | ENSMUST00000099574 | Putative uncharacterized protein gene:ENSMUSG00000074933                       |
| -2.1     | Gm10796          | ENSMUST00000099651 | Putative uncharacterized protein gene:ENSMUSG00000074989                       |
| -1.86    | Gm11437          | NM_001037932       | predicted gene 11437                                                           |
| 3.2      | Gm11545          | NM_001105561       | predicted gene 11545                                                           |
| 3.87     | Gm12185          | NM_001045540       | predicted gene 12185                                                           |
| 26.34    | Gm12250          | NM_001135115       | predicted gene 12250                                                           |
| -1.74    | Gm14085          | NM_001085518       | predicted gene 14085                                                           |
| 1.9      | Gm1943           | NR_002928          | predicted gene 1943, non-coding RNA.                                           |
| 2.2      | Gm1973           | NM_029288          | predicted gene 1973                                                            |
| 1.69     | Gm2022           | NM_001177574       | predicted pseudogene 2022                                                      |
| 2.38     | Gm2897           | NM_001177714       | predicted gene 2897, transcript variant 1                                      |
| 3.15     | Gm3002           | NR_033388          | predicted gene 3002, non-coding RNA.                                           |
| 2.11     | Gm3696           | NM_001024712       | predicted gene 3696                                                            |
| -1.69    | Gm4787           | NM_001038995       | predicted gene 4787                                                            |
| 2.31     | Gm4841           | NM_001034859       | predicted gene 4841                                                            |
| 8.25     | Gm4951 // Gm4... | NM_001033767       | predicted gene 4951 (Gm4951)                                                   |
| 2.29     | Gm4964 // Gm4... | Z95479             | mRNA for IgG1/kappa antibody, scFv48-CK.                                       |
| 5.81     | Gm5431           | NM_001024230       | predicted gene 5431                                                            |
| 2.25     | Gm5458           | NM_001024706       | predicted gene 5458                                                            |
| -2.72    | Gm6718           | XM_905375          | PREDICTED: predicted gene 6718                                                 |
| 1.69     | Gm8300           | NM_001177565       | predicted gene 8300                                                            |
| -2.59    | Gm8979           | NR_030719          | predicted gene 8979, non-coding RNA.                                           |
| 3.16     | Gm9895           | ENSMUST00000065159 | Putative uncharacterized protein (Fragment)                                    |
| -3.28    | Gm9963           | ENSMUST00000068430 | Putative uncharacterized protein                                               |
| 1.85     | Gmnds            | NM_146041          | GDP-mannose 4, 6-dehydratase                                                   |
| 7.5      | Gmi              | NM_001177524       | GPI anchored molecule like protein                                             |
| 2.14     | Gmppb            | NM_177910          | GDP-mannose pyrophosphorylase B                                                |
| 2.09     | Gnl3             | NM_153547          | guanine nucleotide binding protein-like 3 (nucleolar)                          |
| -1.9     | Gnrh1            | NM_008145          | gonadotropin releasing hormone 1                                               |
| 1.82     | Gns              | NM_029364          | glucosamine (N-acetyl)-6-sulfatase                                             |
| -2.14    | Gpatch8          | AK135410           | 12 days embryo female mullerian duct includes surrounding region cDNA          |
| 1.75     | Gpcpd1           | NM_028802          | glycerophosphocholine phosphodiesterase GDE1 homolog (S. cerevisiae)           |
| 1.76     | Gpn1             | NM_133756          | GPN-loop GTPase 1                                                              |
| 1.85     | Gpr160           | NM_001134385       | G protein-coupled receptor 160, transcript variant 1                           |
| -2.02    | Gpr172b          | NM_029643          | G protein-coupled receptor 172B                                                |
| -1.68    | Gpr39            | NM_027677          | G protein-coupled receptor 39                                                  |
| -5.35    | Gprc5a           | NM_181444          | G protein-coupled receptor, family C, group 5, member A                        |
| 1.83     | Gpx2             | NM_030677          | glutathione peroxidase 2                                                       |
| 1.73     | Gramd2           | NM_001033498       | GRAM domain containing 2                                                       |
| -2.7     | Grb7             | NM_010346          | growth factor receptor bound protein 7                                         |
| -3.03    | Gsdmc2           | NM_001168274       | gasdermin C2, transcript variant 1                                             |
| -3.33    | Gsdmc4           | NM_028992          | gasdermin C4                                                                   |
| 2.36     | Gsdmd            | NM_026960          | gasdermin D                                                                    |
| 2.25     | Gsr              | NM_010344          | glutathione reductase                                                          |
| -4.74    | Gsta3            | NM_001077353       | glutathione S-transferase, alpha 3, transcript variant 1                       |
| -1.79    | Gsta4            | NM_010357          | glutathione S-transferase, alpha 4                                             |
| -1.92    | Gstm1            | NM_010358          | glutathione S-transferase, mu 1                                                |
| -5.65    | Gstm3            | NM_010359          | glutathione S-transferase, mu 3                                                |
| -1.73    | Gtf2b            | NM_145546          | general transcription factor IIB                                               |
| 2.05     | Gvin1            | NM_029000          | GTPase, very large interferon inducible 1, transcript variant A                |
| 2.33     | Gzma             | NM_010370          | granzyme A                                                                     |
| 1.92     | Gzmb             | NM_013542          | granzyme B                                                                     |
| 1.77     | H2-DMa           | NM_010386          | histocompatibility 2, class II, locus DMA                                      |
| 2.28     | H2-T24           | NM_008207          | histocompatibility 2, T region locus 24                                        |
| -1.74    | H60b // H60b     | NM_001177775       | histocompatibility 60b (H60b)                                                  |
| 2.48     | Hamp             | NM_032541          | hepcidin antimicrobial peptide                                                 |
| -2.04    | Hbegf            | NM_010415          | heparin-binding EGF-like growth factor                                         |
| -2.67    | Hcn1             | NM_010408          | hyperpolarization-activated, cyclic nucleotide-gated K+ 1                      |
| -1.88    | Hddc3            | NM_026812          | HD domain containing 3                                                         |
| 1.77     | Heatr3           | NM_172757          | HEAT repeat containing 3                                                       |
| 6.19     | Herc6            | NM_025992          | hect domain and RLD 6                                                          |
| 2.07     | Hgf              | NM_010427          | hepatocyte growth factor                                                       |

|       |               |                     |                                                                                      |
|-------|---------------|---------------------|--------------------------------------------------------------------------------------|
| 1.79  | Hist1h2ab     | NM_175660           | histone cluster 1, H2ab                                                              |
| 1.74  | Hist1h2ad     | NM_178188           | histone cluster 1, H2ad                                                              |
| 1.7   | Hist1h2af     | NM_175661           | histone cluster 1, H2af                                                              |
| 1.72  | Hist1h2ag     | NM_178186           | histone cluster 1, H2ag                                                              |
| 1.74  | Hist1h2ah     | NM_175659           | histone cluster 1, H2ah                                                              |
| 1.73  | Hist1h2ai     | NM_178182           | histone cluster 1, H2ai                                                              |
| 1.73  | Hist1h2an     | NM_178184           | histone cluster 1, H2an                                                              |
| 1.75  | Hist1h2ao     | NM_001177544        | histone cluster 1, H2ao                                                              |
| -2.61 | Hist1h2bc     | NM_023422           | histone cluster 1, H2bc                                                              |
| 1.68  | Hist1h2bk     | NM_175665           | histone cluster 1, H2bk                                                              |
| 1.68  | Hist1h2bl     | NM_178199           | histone cluster 1, H2bl                                                              |
| 1.64  | Hist1h2bn     | NM_178201           | histone cluster 1, H2bn                                                              |
| 1.72  | Hist1h3d      | NM_178204           | histone cluster 1, H3d                                                               |
| 1.74  | Hist1h3h      | NM_178206           | histone cluster 1, H3h                                                               |
| 1.69  | Hist1h3i      | NM_178207           | histone cluster 1, H3i                                                               |
| 1.71  | Hist2h2aa1    | NM_013549           | histone cluster 2, H2aa1                                                             |
| 1.65  | Hist2h2ac     | NM_175662           | histone cluster 2, H2ac                                                              |
| 1.78  | Hist2h3b      | NM_178215           | histone cluster 2, H3b                                                               |
| 1.73  | Hist2h3c1     | NM_178216           | histone cluster 2, H3c1                                                              |
| 1.68  | Hist3h2a      | NM_178218           | histone cluster 3, H2a                                                               |
| 3.33  | Hk2           | NM_013820           | hexokinase 2                                                                         |
| 2.44  | Hmcn1         | NM_001024720        | hemicentin 1                                                                         |
| -2.1  | Hmgcs1        | NM_145942           | 3-hydroxy-3-methylglutaryl-Coenzyme A synthase 1                                     |
| 6.44  | Hmgcs2        | NM_008256           | 3-hydroxy-3-methylglutaryl-Coenzyme A synthase 2                                     |
| 1.93  | Hs3st1        | NM_010474           | heparan sulfate (glucosamine) 3-O-sulfotransferase 1                                 |
| -1.67 | Hsd17b11      | NM_053262           | hydroxysteroid (17-beta) dehydrogenase 11                                            |
| -3.41 | Hsd17b2       | NM_008290           | hydroxysteroid (17-beta) dehydrogenase 2                                             |
| -2.29 | Hsd17b6       | NM_013786           | hydroxysteroid (17-beta) dehydrogenase 6                                             |
| 1.88  | Hspa1a        | NM_010479           | heat shock protein 1A                                                                |
| 1.94  | Hsph1         | NM_013559           | heat shock 105kDa/110kDa protein 1                                                   |
| 1.73  | Hyou1         | NM_021395           | hypoxia up-regulated 1                                                               |
| 1.99  | I830012O16... | NM_001005858        | RIKEN cDNA I830012O16 gene                                                           |
| 1.77  | Iars          | NM_172015           | isoleucine-tRNA synthetase                                                           |
| 1.89  | Icam1         | NM_010493           | intercellular adhesion molecule 1                                                    |
| -1.68 | Id1           | NM_145360           | isopentenyl-diphosphate delta isomerase                                              |
| 3.0   | Ifi203        | NM_001045481        | interferon activated gene 203, transcript variant 1                                  |
| 4.67  | Ifi204        | NM_008329           | interferon activated gene 204                                                        |
| 6.35  | Ifi205        | NM_172648           | interferon activated gene 205                                                        |
| 4.76  | Ifi44         | NM_133871           | interferon-induced protein 44                                                        |
| 4.81  | Ifi47         | NM_008330           | interferon gamma inducible protein 47                                                |
| 1.8   | Ifih1         | NM_027835           | interferon induced with helicase C domain 1, transcript variant 1                    |
| 5.32  | Ifit1         | NM_008331           | interferon-induced protein with tetratricopeptide repeats 1                          |
| 3.59  | Ifit2         | NM_008332           | interferon-induced protein with tetratricopeptide repeats 2                          |
| 5.83  | Ifit3         | NM_010501           | interferon-induced protein with tetratricopeptide repeats 3                          |
| 2.31  | Ifitm1        | NM_026820           | interferon induced transmembrane protein 1, transcript variant 1                     |
| 1.77  | Ifitm3        | NM_025378           | interferon induced transmembrane protein 3                                           |
| -2.3  | Igh-6         | BC053409            | immunoglobulin heavy chain 6 (heavy chain of IgM), mRNA (cDNA clone IMAGE:30076516). |
| 3.35  | Ighg          | X70423              | M.musculus mRNA for monoclonal antibody heavy chain gamma 2a.                        |
| -4.97 | Igk-V19-14    | U59155              | anti-DNA light chain (Vk19) mRNA, partial cds.                                       |
| -2.5  | Igk-V28       | DQ078272            | immunoglobulin kappa light chain mRNA, complete cds.                                 |
| 9.82  | Ilgp1         | NM_001146275        | interferon inducible GTPase 1, transcript variant 2                                  |
| 2.45  | Il15ra        | NM_008358           | interleukin 15 receptor, alpha chain, transcript variant 1                           |
| 2.75  | Il18          | NM_008360           | interleukin 18                                                                       |
| 2.5   | Il18bp        | NM_010531           | interleukin 18 binding protein                                                       |
| 1.65  | Il18r1        | NM_008365           | interleukin 18 receptor 1, transcript variant 1                                      |
| -1.81 | Il1r1         | NM_001025602        | interleukin 1 receptor-like 1, transcript variant 1                                  |
| -1.89 | Il22ra1       | NM_178257           | interleukin 22 receptor, alpha 1                                                     |
| -2.37 | Il22ra2       | NM_178258           | interleukin 22 receptor, alpha 2                                                     |
| 2.51  | Il33          | NM_001164724        | interleukin 33, transcript variant 1                                                 |
| 2.3   | Il4ra         | NM_001008700        | interleukin 4 receptor, alpha                                                        |
| 1.74  | Il7           | NM_008371           | interleukin 7                                                                        |
| 2.22  | Inpp1         | NM_008384           | inositol polyphosphate-1-phosphatase                                                 |
| -3.78 | Insig1        | NM_153526           | insulin induced gene 1                                                               |
| 2.59  | Irf1          | NM_008390           | interferon regulatory factor 1, transcript variant 1                                 |
| 2.75  | Irf8          | NM_008320           | interferon regulatory factor 8                                                       |
| 1.75  | Irf9          | NM_001159417        | interferon regulatory factor 9, transcript variant 1                                 |
| 8.57  | Irgm1         | NM_008326           | immunity-related GTPase family M member 1                                            |
| 13.79 | Irgm2         | NM_019440           | immunity-related GTPase family M member 2                                            |
| 3.52  | Isg15         | NM_015783           | ISG15 ubiquitin-like modifier                                                        |
| -1.72 | Itpa8         | NM_001001309        | integrin alpha 8                                                                     |
| -2.38 | Kbtbd11       | NM_029116           | kelch repeat and BTB (POZ) domain containing 11                                      |
| 2.06  | Kbtbd8        | NM_001008785        | kelch repeat and BTB (POZ) domain containing 8, transcript variant 1                 |
| -2.26 | Kcnj13        | NM_001110227        | potassium inwardly-rectifying channel, subfamily J, member 13                        |
| -1.79 | Kdsr          | NM_027534           | 3-ketodihydrospingosine reductase                                                    |
| -1.69 | Khvyn         | NM_027143           | KH and NYN domain containing                                                         |
| -2.57 | Klff6         | NM_011803           | Kruppel-like factor 6                                                                |
| 2.1   | Klhdc4        | NM_145605           | kelch domain containing 4                                                            |
| -1.77 | Klhl24        | NM_029436           | kelch-like 24 (Drosophila)                                                           |
| -1.69 | Klhl6         | NM_183390           | kelch-like 6 (Drosophila)                                                            |
| -1.82 | Klk1          | NM_010639           | kallikrein 1                                                                         |
| 1.72  | Klra2         | NM_001170851        | killer cell lectin-like receptor, subfamily A, member 2, transcript variant 1        |
| -1.84 | Krt23         | NM_033373           | keratin 23                                                                           |
| 1.67  | Kti12         | NM_029571           | KTI12 homolog, chromatin associated (S. cerevisiae)                                  |
| -4.25 | Lama3         | NM_010680           | laminin, alpha 3                                                                     |
| 1.75  | Lanc1         | NM_001190985        | LanC (bacterial lantibiotic synthetase component C)-like 1, transcript variant 1     |
| 1.98  | Lars          | NM_134137           | leucyl-tRNA synthetase                                                               |
| 1.92  | Lbp           | NM_008489           | lipopolysaccharide binding protein                                                   |
| 3.31  | Lcn2          | NM_008491           | lipocalin 2                                                                          |
| -1.76 | Lct           | NM_001081078        | lactase                                                                              |
| -2.15 | Leap2         | NM_153069           | liver-expressed antimicrobial peptide 2                                              |
| -2.01 | Lipa          | NM_021460           | lysosomal acid lipase A, transcript variant 1                                        |
| 2.24  | LOC1000462... | ENSMUST000001035... | similar to Igha protein gene:ENSMUSG00000076731                                      |



|       |           |              |                                                                                    |
|-------|-----------|--------------|------------------------------------------------------------------------------------|
| -3.31 | Lxli2     | NM_033325    | lysyl oxidase-like 2                                                               |
| -2.2  | Lpin2     | NM_001164885 | lipin 2, transcript variant 1                                                      |
| -5.42 | Lrat      | NM_023624    | lecithin-retinol acyltransferase (phosphatidylcholine-retinol-O-acyltransferase)   |
| 1.96  | Lrg1      | NM_029796    | leucine-rich alpha-2-glycoprotein 1                                                |
| -1.82 | Lrrc8b    | NM_001033550 | leucine rich repeat containing 8 family, member B                                  |
| 1.75  | Lsm5      | NM_025520    | LSM5 homolog, U6 small nuclear RNA associated ( <i>S. cerevisiae</i> )             |
| -1.94 | Lss       | NM_146006    | lanosterol synthase                                                                |
| 3.53  | Ly6a      | NM_010738    | lymphocyte antigen 6 complex, locus A                                              |
| 3.36  | Ly6c1     | NM_010741    | lymphocyte antigen 6 complex, locus C1                                             |
| 2.49  | Ly6c2     | NM_001099217 | lymphocyte antigen 6 complex, locus C2                                             |
| 1.85  | Ly6e      | NM_001164036 | lymphocyte antigen 6 complex, locus E, transcript variant 1                        |
| -4.55 | Ly6g6c    | NM_023463    | lymphocyte antigen 6 complex, locus G6C                                            |
| -2.16 | Ly96      | NM_016923    | lymphocyte antigen 96, transcript variant 1                                        |
| 2.02  | Lyar      | NM_025281    | Ly1 antibody reactive clone                                                        |
| 1.68  | Mafb      | NM_010658    | v-maf musculoaponeurotic fibrosarcoma oncogene family, protein B (avian)           |
| -1.99 | Maob      | NM_172778    | monoamine oxidase B, nuclear gene encoding mitochondrial protein                   |
| -1.9  | Map2k6    | NM_011943    | mitogen-activated protein kinase kinase 6                                          |
| -1.84 | Map3k13   | NM_172821    | mitogen-activated protein kinase kinase kinase 13                                  |
| 1.93  | Mapkbp1   | NM_011941    | mitogen-activated protein kinase binding protein 1                                 |
| -1.76 | 7-Mar     | NM_020575    | membrane-associated ring finger (C3HC4) 7                                          |
| -2.33 | Marcks1   | NM_010807    | MARCKS-like 1                                                                      |
| 2.27  | Mars      | NM_001171582 | methionine-tRNA synthetase, transcript variant 1                                   |
| -2.0  | Mastl     | NM_025979    | microtubule associated serine/threonine kinase-like                                |
| 2.19  | Mdn1      | NM_001081392 | midasin homolog (yeast)                                                            |
| -4.23 | Me1       | NM_008615    | maic enzyme 1, NADP(+)-dependent, cytosolic                                        |
| 2.3   | Med21     | NM_025315    | mediator complex subunit 21                                                        |
| 1.97  | Med27     | NM_026896    | mediator complex subunit 27                                                        |
| 1.8   | Med30     | NM_027212    | mediator complex subunit 30                                                        |
| -1.77 | Mef2c     | NM_001170537 | myocyte enhancer factor 2C, transcript variant 1                                   |
| -1.72 | Megf9     | NM_172694    | multiple EGF-like-domains 9                                                        |
| -2.73 | Mettl7a1  | NM_027334    | methyltransferase like 7A1                                                         |
| 1.95  | Mfsd2a    | NM_029662    | major facilitator superfamily domain containing 2A                                 |
| -2.06 | Mfsd7c    | NM_145447    | major facilitator superfamily domain containing 7C                                 |
| -1.65 | Mfsd9     | NM_172499    | major facilitator superfamily domain containing 9                                  |
| 1.96  | Mid1      | NM_010797    | midline 1, transcript variant 1                                                    |
| -2.18 | Mir181a-2 | NR_029568    | microRNA 181a-2, microRNA.                                                         |
| -2.2  | Mir181b-2 | NR_029904    | microRNA 181b-2, microRNA.                                                         |
| -2.88 | Mir194-1  | NR_029580    | microRNA 194-1, microRNA.                                                          |
| -2.0  | Mir215    | NR_029908    | microRNA 215, microRNA.                                                            |
| -1.65 | Mir31     | NR_029747    | microRNA 31, microRNA.                                                             |
| 1.91  | Mitd1     | NM_026913    | MIT, microtubule interacting and transport, domain containing 1                    |
| 3.39  | Mikl      | NM_029005    | mixed lineage kinase domain-like                                                   |
| -1.7  | Mlxipl    | NM_021455    | MLX interacting protein-like                                                       |
| -2.28 | Mme       | NM_008604    | membrane metallo endopeptidase                                                     |
| 2.25  | Mmp13     | NM_008607    | matrix metalloproteinase 13                                                        |
| 1.86  | Mmp7      | NM_010810    | matrix metalloproteinase 7                                                         |
| -1.8  | Mospd1    | NM_027409    | motile sperm domain containing 1                                                   |
| 8.69  | Mpa2l     | NM_194336    | macrophage activation 2 like                                                       |
| -1.71 | Mpzl3     | NM_176993    | myelin protein zero-like 3, transcript variant 1                                   |
| 2.5   | Mrpl22    | NM_175001    | mitochondrial ribosomal protein L22, mitochondrial protein                         |
| 1.74  | Mrpl47    | NM_029017    | mitochondrial ribosomal protein L47, mitochondrial protein                         |
| 1.76  | Mrps18b   | NM_025878    | mitochondrial ribosomal protein S18B, mitochondrial protein                        |
| 1.9   | Mrto4     | NM_023536    | MRT4, mRNA turnover 4, homolog ( <i>S. cerevisiae</i> )                            |
| -3.08 | Ms4a1     | NM_007641    | membrane-spanning 4-domains, subfamily A, member 1                                 |
| 1.8   | Ms4a4c    | NM_029499    | membrane-spanning 4-domains, subfamily A, member 4C                                |
| 2.14  | Ms4a4d    | NM_025658    | membrane-spanning 4-domains, subfamily A, member 4D                                |
| 1.86  | Ms4a6b    | NM_027209    | membrane-spanning 4-domains, subfamily A, member 6B                                |
| -1.67 | Ms4a7     | NM_027836    | membrane-spanning 4-domains, subfamily A, member 7, transcript variant 1           |
| 2.17  | Msr1      | NM_031195    | macrophage scavenger receptor 1, transcript variant 1                              |
| 1.78  | Mtf1      | NM_008636    | metal response element binding transcription factor 1                              |
| 4.01  | Mthfd2    | NM_008638    | methylenetetrahydrofolate dehydrogenase (NAD+ dependent), mitochondrial            |
| -1.7  | Mtmr11    | NM_181409    | myotubularin related protein 11                                                    |
| 1.91  | Mx1       | NM_010846    | myxovirus (influenza virus) resistance 1                                           |
| 9.15  | Mx2       | NR_003508    | myxovirus (influenza virus) resistance 2, non-coding RNA.                          |
| 2.04  | Mybbp1a   | NM_016776    | MYB binding protein (P160) 1a                                                      |
| 2.43  | Myc       | NM_010849    | myelocytomatosis oncogene, transcript variant 1                                    |
| -2.21 | Myo9a     | NM_173018    | myosin IXa                                                                         |
| 9.94  | Myot      | NM_001033621 | myotilin                                                                           |
| 1.72  | N4bp1     | NM_030563    | NEDD4 binding protein 1                                                            |
| -1.76 | Naaladl1  | NM_001009546 | N-acetylated alpha-linked acidic dipeptidase-like 1                                |
| 2.62  | Nampt     | NM_021524    | nicotinamide phosphoribosyltransferase                                             |
| -1.71 | Nbeal1    | NM_173444    | neurobeachin like 1                                                                |
| 1.74  | Ncald     | NM_134094    | neurocalcin delta, transcript variant 1                                            |
| -2.27 | Ndfip2    | NM_029561    | Nedd4 family interacting protein 2, transcript variant 1                           |
| -1.82 | Ndrp1     | NM_008681    | N-myc downstream regulated gene 1                                                  |
| -2.38 | Nedd9     | NM_001111324 | neural precursor cell expressed, developmentally down-regulated gene 9             |
| -2.1  | Nek3      | NM_001162947 | NIMA (never in mitosis gene a)-related expressed kinase 3                          |
| -1.79 | Nexn      | NM_199465    | nexilin                                                                            |
| 2.06  | Nfkbiz    | NM_030612    | nuclear factor of kappa light polypeptide gene enhancer in B-cells inhibitor, zeta |
| -1.74 | Ngef      | NM_001111314 | neuronal guanine nucleotide exchange factor, transcript variant 1                  |
| -1.8  | Nipal1    | NM_001081205 | NIPA-like domain containing 1                                                      |
| 6.64  | Nlr5      | NM_001033207 | NLR family, CARD domain containing 5                                               |
| 1.85  | Noc4l     | NM_153570    | nucleolar complex associated 4 homolog ( <i>S. cerevisiae</i> )                    |
| 1.82  | Nol10     | NM_001008421 | nucleolar protein 10                                                               |
| 1.68  | Nol11     | NM_133702    | nucleolar protein 11, transcript variant 1                                         |
| 1.83  | Nolc1     | NM_053086    | nucleolar and coiled-body phosphoprotein 1, transcript variant 1                   |
| 1.75  | Nop2      | NM_138747    | NOP2 nucleolar protein homolog (yeast)                                             |
| 2.01  | Nop56     | NM_024193    | NOP56 ribonucleoprotein homolog (yeast)                                            |
| 16.71 | Nos2      | NM_010927    | nitric oxide synthase 2, inducible                                                 |
| -2.65 | Npc1      | NM_008720    | Niemann Pick type C1                                                               |
| -1.97 | Npc111    | NM_207242    | NPC1-like 1                                                                        |
| -2.22 | Nqo1      | NM_008706    | NAD(P)H dehydrogenase, quinone 1                                                   |

|       |           |              |                                                                                              |
|-------|-----------|--------------|----------------------------------------------------------------------------------------------|
| 1.71  | Nrg1      | NM_178591    | neuregulin 1                                                                                 |
| 1.71  | Nsf       | NM_008740    | N-ethylmaleimide sensitive fusion protein                                                    |
| -6.37 | Nt5e      | NM_011851    | 5' nucleotidase, ecto                                                                        |
| 1.78  | Nudt5     | NM_016918    | nudix (nucleoside diphosphate linked moiety X)-type motif 5                                  |
| 2.51  | Oas1a     | NM_145211    | 2'-5' oligoadenylate synthetase 1A                                                           |
| 3.12  | Oas1b     | NR_003507    | 2'-5' oligoadenylate synthetase 1B, non-coding RNA.                                          |
| 2.5   | Oas1g     | NM_011852    | 2'-5' oligoadenylate synthetase 1G                                                           |
| 7.99  | Oas2      | NM_145227    | 2'-5' oligoadenylate synthetase 2                                                            |
| 2.38  | Oas3      | NM_145226    | 2'-5' oligoadenylate synthetase 3                                                            |
| 2.38  | Oasl2     | NM_011854    | 2'-5' oligoadenylate synthetase-like 2                                                       |
| -1.88 | Oat       | NM_016978    | ornithine aminotransferase, nuclear gene encoding mitochondrial protein                      |
| 4.03  | Ociad2    | NM_026950    | OClA domain containing 2                                                                     |
| -1.78 | Ocln      | NM_008756    | occludin                                                                                     |
| -1.84 | Ocm       | NM_033039    | oncomodulin                                                                                  |
| -1.97 | Odf3b     | NM_001013022 | outer dense fiber of sperm tails 3B                                                          |
| 1.89  | Ogfr      | NM_031373    | opioid growth factor receptor                                                                |
| -1.97 | Ogn       | NM_008760    | osteoglycin                                                                                  |
| -1.74 | Olfrr165  | NM_146466    | olfactory receptor 165                                                                       |
| 2.71  | Osmr      | NM_011019    | oncostatin M receptor                                                                        |
| -1.79 | Otud1     | NM_027715    | OTU domain containing 1                                                                      |
| -1.69 | Oxsm      | NM_027695    | 3-oxoacyl-ACP synthase, mitochondrial, nuclear gene encoding mitochondrial protein           |
| -1.82 | P2ry2     | NM_008773    | purinergic receptor P2Y, G-protein coupled 2                                                 |
| 2.84  | Pappa     | NM_021362    | pregnancy-associated plasma protein A                                                        |
| -1.7  | Papss2    | NM_011864    | 3'-phosphoadenosine 5'-phosphosulfate synthase 2                                             |
| 2.97  | Parp11    | NM_181402    | poly (ADP-ribose) polymerase family, member 11                                               |
| 2.36  | Parp12    | NM_172893    | poly (ADP-ribose) polymerase family, member 12                                               |
| 2.61  | Parp14    | NM_001039530 | poly (ADP-ribose) polymerase family, member 14                                               |
| 2.24  | Parp9     | NM_030253    | poly (ADP-ribose) polymerase family, member 9                                                |
| 3.01  | Pcdh9     | NM_001081377 | protocadherin 9                                                                              |
| -2.62 | Pck1      | NM_011044    | phosphoenolpyruvate carboxykinase 1, cytosolic                                               |
| -1.79 | Pcp4      | NM_008791    | Purkinje cell protein 4                                                                      |
| -1.73 | Pcp4l1    | NM_025557    | Purkinje cell protein 4-like 1                                                               |
| -1.89 | Pcyox1    | NM_025823    | prenylcysteine oxidase 1                                                                     |
| 2.12  | Pdgfc     | NM_019971    | platelet-derived growth factor, C polypeptide                                                |
| -1.77 | Pdk2      | NM_133667    | pyruvate dehydrogenase kinase, isoenzyme 2                                                   |
| -1.72 | Pebp1     | NM_018858    | phosphatidylethanolamine binding protein 1                                                   |
| -1.69 | Perp      | NM_022032    | PERP, TP53 apoptosis effector                                                                |
| -2.71 | Pex1      | NM_027777    | peroxisomal biogenesis factor 1                                                              |
| 2.2   | Pex11a    | NM_011068    | peroxisomal biogenesis factor 11 alpha                                                       |
| 6.78  | Pfkfb3    | NM_001177753 | 6-phosphofructo-2-kinase/fructose-2,6-bisphosphatase 3, transcript variant 2                 |
| -1.7  | Pgap1     | NM_001163314 | post-GPI attachment to proteins 1                                                            |
| -2.11 | Pglyrp1   | NM_009402    | peptidoglycan recognition protein 1                                                          |
| -1.91 | Pgm1      | NM_025700    | phosphoglucomutase 1                                                                         |
| 2.35  | Pgs1      | NM_133757    | phosphatidylglycerophosphate synthase 1                                                      |
| 1.69  | Phgdh     | NM_016966    | 3-phosphoglycerate dehydrogenase                                                             |
| -1.69 | Plk3r3    | NM_181585    | phosphatidylinositol 3 kinase, regulatory subunit, polypeptide 3 (p55)                       |
| -2.09 | Pisd-ps1  | NR_003517    | phosphatidylserine decarboxylase, pseudogene 1, non-coding RNA.                              |
| -1.73 | Pkiq      | NM_001039390 | protein kinase inhibitor, gamma, transcript variant 2                                        |
| 1.78  | Pla2g2f   | NM_012045    | phospholipase A2, group IIF                                                                  |
| 3.55  | Pla2g5    | NM_001122954 | phospholipase A2, group V, transcript variant 1                                              |
| 1.64  | Plac8     | NM_139198    | placenta-specific 8                                                                          |
| 2.25  | Plce1     | NM_019588    | phospholipase C, epsilon 1                                                                   |
| -2.07 | Plek2     | NM_013738    | pleckstrin 2                                                                                 |
| -1.97 | Plekha1   | NM_133942    | pleckstrin homology domain containing, family A                                              |
| -1.83 | Plekha3   | NM_001039493 | pleckstrin homology domain containing, family M, member 3                                    |
| -4.83 | Pmp22     | NM_008885    | peripheral myelin protein 22                                                                 |
| -2.65 | Pnliprp2  | NM_011128    | pancreatic lipase-related protein 2                                                          |
| 1.99  | Pnpt1     | NM_027869    | polyribonucleotide nucleotidyltransferase 1                                                  |
| -2.09 | Pof1b     | NM_181579    | premature ovarian failure 1B                                                                 |
| 1.74  | Polr1b    | NM_009086    | polymerase (RNA) I polypeptide B                                                             |
| -2.04 | Polr3e    | NM_025298    | polymerase (RNA) III (DNA directed) polypeptide E, transcript variant 1                      |
| 1.71  | Pop1      | NM_152894    | processing of precursor 1, ribonuclease P/MRP family, (S. cerevisiae), transcript variant 1  |
| -1.81 | Ppap2a    | NM_008247    | phosphatidic acid phosphatase type 2A, transcript variant 1                                  |
| -1.69 | Ppara     | NM_011144    | peroxisome proliferator activated receptor alpha, transcript variant 1                       |
| 1.82  | Ppm1h     | NM_001110218 | protein phosphatase 1H (PP2C domain containing), transcript variant 1                        |
| 2.04  | Ppm1k     | NM_175523    | protein phosphatase 1K (PP2C domain containing), nuclear gene encoding mitochondrial protein |
| 1.92  | Pprc1     | NM_001081214 | peroxisome proliferative activated receptor, gamma, coactivator-related 1                    |
| -1.92 | Prap1     | NM_009475    | proline-rich acidic protein 1                                                                |
| 1.76  | Prkg2     | NM_008926    | protein kinase, cGMP-dependent, type II                                                      |
| -2.65 | Prmt3     | NM_133740    | protein arginine N-methyltransferase 3                                                       |
| 2.04  | Prmt7     | NM_145404    | protein arginine N-methyltransferase 7                                                       |
| 1.89  | Prodh     | NM_011172    | proline dehydrogenase, nuclear gene encoding mitochondrial protein                           |
| 1.78  | Prom1     | NM_001163577 | prominin 1, transcript variant 2                                                             |
| 1.72  | Prr13     | NM_025385    | proline rich 13, transcript variant 1                                                        |
| -2.06 | Prr15     | NM_030024    | proline rich 15                                                                              |
| 1.99  | Prrg4     | NM_178695    | proline rich Gla (G-carboxyglutamic acid) 4 (transmembrane)                                  |
| -2.28 | Prss48    | NM_001001650 | protease, serine, 48                                                                         |
| 4.65  | Psat1     | NM_177420    | phosphoserine aminotransferase 1                                                             |
| 3.16  | Psmb8     | NM_010724    | proteasome (prosome, macropain) subunit, beta type 8                                         |
| 3.58  | Psmb9     | NM_013585    | proteasome (prosome, macropain) subunit, beta type 9                                         |
| -2.06 | Pten      | BC150968     | RIKEN cDNA B430203M17 gene, mRNA (cDNA clone MGC:183880 IMAGE:9087880), complete cds.        |
| -1.83 | Pter      | NM_008961    | phosphotriesterase related                                                                   |
| 5.8   | Ptk6      | NM_009184    | PTK6 protein tyrosine kinase 6                                                               |
| 1.84  | Ptpn1     | NM_011201    | protein tyrosine phosphatase, non-receptor type 1                                            |
| 2.29  | Ptpn22    | NM_008979    | protein tyrosine phosphatase, non-receptor type 22 (lymphoid)                                |
| -2.0  | Pttg1ip   | NM_145925    | pituitary tumor-transforming 1 interacting protein                                           |
| -1.66 | Rab11fip1 | NM_001080813 | RAB11 family interacting protein 1 (class I), transcript variant 1                           |
| -2.69 | Rab30     | NM_029494    | RAB30, member RAS oncogene family                                                            |
| 1.74  | Rab8b     | NM_173413    | RAB8B, member RAS oncogene family                                                            |
| -1.7  | Rabac1    | NM_010261    | Rab acceptor 1 (prenylated)                                                                  |
| 1.72  | Ralgapa2  | NM_001033348 | Ral GTPase activating protein, alpha subunit 2 (catalytic)                                   |
| 1.65  | Ranbp1    | NM_011239    | RAN binding protein 1                                                                        |

|       |           |                    |                                                                                  |
|-------|-----------|--------------------|----------------------------------------------------------------------------------|
| 4.28  | Rasd1     | NM_009026          | RAS, dexamethasone-induced 1                                                     |
| -5.87 | Rasgef1b  | NM_145839          | RasGEF domain family, member 1B, transcript variant 1                            |
| 2.37  | Rassf4    | NM_178045          | Ras association (RalGDS/AF-6) domain family member 4                             |
| 1.77  | Rbm19     | NM_028762          | RNA binding motif protein 19                                                     |
| -1.68 | Rbp2      | NM_009034          | retinol binding protein 2, cellular                                              |
| 5.52  | Rdh18-ps  | AY053573           | truncated cis-retinol/3alpha-hydroxysterol short-chain dehydrogenase mRNA        |
| -2.34 | Rdh7      | NM_001150749       | retinol dehydrogenase 7, transcript variant 1                                    |
| 1.85  | Reg1      | NM_009042          | regenerating islet-derived 1                                                     |
| 5.07  | Reg3b     | NM_011036          | regenerating islet-derived 3 beta                                                |
| 2.35  | Reg3d     | NM_013893          | regenerating islet-derived 3 delta, transcript variant 1                         |
| 3.62  | Reg3g     | NM_011260          | regenerating islet-derived 3 gamma                                               |
| -3.15 | Reg4      | NM_026328          | regenerating islet-derived family, member 4                                      |
| -2.9  | Reps2     | NM_178256          | RALBP1 associated Eps domain containing protein 2                                |
| 21.34 | Retnlb    |                    | resistin like beta                                                               |
| -3.27 | Rgs13     | NM_153171          | regulator of G-protein signaling 13                                              |
| 1.68  | Rgs4      | NM_009062          | regulator of G-protein signaling 4                                               |
| 1.79  | Rhoj      | NM_023275          | ras homolog gene family, member J                                                |
| 1.84  | Ripk2     | NM_138952          | receptor (TNFRSF)-interacting serine-threonine kinase 2                          |
| 1.75  | Ripk3     | NM_019955          | receptor-interacting serine-threonine kinase 3, transcript variant 1             |
| -2.05 | Rmnd5a    | NM_024288          | required for meiotic nuclear division 5 homolog A (S. cerevisiae)                |
| 2.08  | Rnasel    | NM_011882          | ribonuclease L (2', 5'-oligoadenylate synthetase-dependent)                      |
| -1.81 | Rnf125    | NM_026301          | ring finger protein 125                                                          |
| -2.49 | Rnf152    | NM_178779          | ring finger protein 152, transcript variant 1                                    |
| -2.25 | Rnf167    | NM_027445          | ring finger protein 167                                                          |
| -1.72 | Rnf170    | NM_029965          | ring finger protein 170                                                          |
| 2.28  | Rnf19b    | NM_029219          | ring finger protein 19B                                                          |
| 6.31  | Rnf213    | AK173199           | premature mRNA for mKIAA1554 protein.                                            |
| 7.75  | Rnf213    | ENSMUST00000131035 | hypothetical protein gene:ENSMUSG00000070327                                     |
| -1.72 | Rnf24     | NM_178607          | ring finger protein 24                                                           |
| -2.98 | Rnf32     | NM_021470          | ring finger protein 32                                                           |
| 2.12  | Rnu3a     | NR_002842          | U3A small nuclear RNA, small nuclear RNA.                                        |
| 1.84  | Rpf2      | NM_023323          | ribosome production factor 2 homolog (S. cerevisiae), transcript variant 1       |
| 1.86  | Rpia      | NM_009075          | ribose 5-phosphate isomerase A                                                   |
| -2.4  | Rpl34     | NM_026724          | ribosomal protein L34, transcript variant 1                                      |
| -1.87 | Rps3a     | BC084675           | ribosomal protein S3A, mRNA (cDNA clone MGC:102469 IMAGE:5319512), complete cds. |
| -2.0  | Rragd     | NM_027491          | Ras-related GTP binding D                                                        |
| 1.66  | Rrp12     | NM_199447          | ribosomal RNA processing 12 homolog (S. cerevisiae)                              |
| 1.83  | Rrp15     | NM_026041          | ribosomal RNA processing 15 homolog (S. cerevisiae)                              |
| 2.45  | Rrp1b     | NM_028244          | ribosomal RNA processing 1 homolog B (S. cerevisiae), transcript variant 1       |
| 1.66  | Rrp9      | NM_145620          | RRP9, small subunit (SSU) processome component, homolog (yeast)                  |
| 2.2   | Rsad2     | NM_021384          | radical S-adenosyl methionine domain containing 2                                |
| 2.76  | Rtp4      | NM_023386          | receptor transporter protein 4                                                   |
| 1.75  | Ruvbl1    | NM_019685          | RuvB-like protein 1                                                              |
| -2.67 | S100a6    | NM_011313          | S100 calcium binding protein A6 (calyculin)                                      |
| 7.28  | Saa1      | NM_009117          | serum amyloid A 1                                                                |
| 2.23  | Samhd1    | NM_018851          | SAM domain and HD domain, 1, transcript variant 1                                |
| 1.96  | Sbno2     | NM_183426          | strawberry notch homolog 2 (Drosophila)                                          |
| -3.34 | Scd1      | NM_009127          | stearoyl-Coenzyme A desaturase 1                                                 |
| -6.16 | Scd2      | NM_009128          | stearoyl-Coenzyme A desaturase 2                                                 |
| -1.9  | Sdcbp2    | NM_145535          | syndecan binding protein (syntenin) 2                                            |
| -2.3  | Sec14l2   | NM_144520          | SEC14-like 2 (S. cerevisiae)                                                     |
| 1.94  | Sec23b    | NM_019787          | SEC23B (S. cerevisiae)                                                           |
| -2.49 | Serinc3   | NM_012032          | serine incorporator 3                                                            |
| -2.2  | Serinc5   | NM_172588          | serine incorporator 5                                                            |
| -1.73 | Serpina1b | NM_009244          | serine (or cysteine) peptidase inhibitor, clade A, member 1B                     |
| 4.23  | Serpina3f | NM_001168294       | serine (or cysteine) peptidase inhibitor, clade A, member 3F                     |
| 7.75  | Serpina3n | NM_009252          | serine (or cysteine) peptidase inhibitor, clade A, member 3N                     |
| 1.82  | Serping1  | NM_009776          | serine (or cysteine) peptidase inhibitor, clade G, member 1                      |
| -3.01 | Sesn1     | NM_001162908       | sestrin 1, transcript variant 1                                                  |
| -1.71 | Sfn       | NM_018754          | stratifin                                                                        |
| -1.7  | Sgcd      | NM_011891          | sarcoglycan, delta (dystrophin-associated glycoprotein)                          |
| 2.1   | Sgk1      | NM_001161845       | serum/glucocorticoid regulated kinase 1, transcript variant 1                    |
| -1.69 | Sgk2      | NM_013731          | serum/glucocorticoid regulated kinase 2                                          |
| 2.84  | Sgpp1     | NM_030750          | sphingosine-1-phosphate phosphatase 1                                            |
| 2.13  | Shmt2     | NM_028230          | serine hydroxymethyltransferase 2 (mitochondrial), mitochondrial                 |
| -2.13 | Siae      | NM_011734          | sialic acid acetyltransferase                                                    |
| -1.99 | Siah1a    | NM_009172          | seven in absentia 1A                                                             |
| 3.05  | Slc10a2   | NM_011388          | solute carrier family 10, member 2                                               |
| -2.37 | Slc10a5   | NM_001010834       | solute carrier family 10 (sodium/bile acid cotransporter family), member 5       |
| 2.04  | Slc10a6   | NM_029415          | solute carrier family 10 (sodium/bile acid cotransporter family), member 6       |
| -2.91 | Slc14a1   | NM_001171010       | solute carrier family 14 (urea transporter), member 1, transcript variant 1      |
| -7.71 | Slc17a4   | NM_177016          | solute carrier family 17 (sodium phosphate), member 4                            |
| -3.15 | Slc17a5   | NM_172773          | solute carrier family 17 (anion/sugar transporter), member 5                     |
| -1.98 | Slc22a5   | NM_011396          | solute carrier family 22 (organic cation transporter), member 5                  |
| -1.88 | Slc23a1   | NM_011397          | solute carrier family 23 (nucleobase transporters), member 1                     |
| -2.12 | Slc25a37  | NM_026331          | solute carrier family 25, member 37, nuclear gene encoding mitochondrial protein |
| -1.79 | Slc25a45  | NM_134154          | solute carrier family 25, member 45                                              |
| 1.97  | Slc26a2   | NM_007885          | solute carrier family 26 (sulfate transporter), member 2                         |
| -1.66 | Slc27a4   | NM_011989          | solute carrier family 27 (fatty acid transporter), member 4                      |
| -1.84 | Slc28a1   | NM_001004184       | solute carrier family 28 (sodium-coupled nucleoside transporter), member 1       |
| 1.74  | Slc28a3   | NM_022317          | solute carrier family 28 (sodium-coupled nucleoside transporter), member 3       |
| -1.74 | Slc30a4   | NM_011774          | solute carrier family 30 (zinc transporter), member 4                            |
| 5.81  | Slc36a1   | NM_153139          | solute carrier family 36 (proton/amino acid symporter), member 1                 |
| 1.75  | Slc39a10  | NM_172653          | solute carrier family 39 (zinc transporter), member 10                           |
| -1.92 | Slc39a4   | NM_028064          | solute carrier family 39 (zinc transporter), member 4                            |
| 2.57  | Slc43a3   | NM_021398          | solute carrier family 43, member 3                                               |
| -1.83 | Slc44a1   | ENSMUST00000107651 | Solute carrier family 44, member 1 gene:ENSMUSG00000028412                       |
| -1.87 | Slc44a3   | NM_145394          | solute carrier family 44, member 3                                               |
| -1.74 | Slc46a1   | NM_026740          | solute carrier family 46, member 1                                               |
| -1.72 | Slc46a3   | NM_027872          | solute carrier family 46, member 3                                               |
| 1.97  | Slc5a3    | NM_017391          | solute carrier family 5 (inositol transporters), member 3                        |
| -2.61 | Slc5a4a   | NM_133184          | solute carrier family 5, member 4a                                               |

|       |            |                    |                                                                                   |
|-------|------------|--------------------|-----------------------------------------------------------------------------------|
| -1.99 | Slc5a4b    | NM_023219          | solute carrier family 5 (neutral amino acid transporters, system A), member 4b    |
| 1.96  | Slc5a8     | NM_145423          | solute carrier family 5 (iodide transporter), member 8                            |
| -2.26 | Slc6a20a   | NM_139142          | solute carrier family 6 (neurotransmitter transporter), member 20A                |
| 2.55  | Slc7a11    | NM_011990          | solute carrier family 7 (cationic amino acid transporter, y+ system), member 11   |
| 2.49  | Slc7a5     | NM_011404          | solute carrier family 7 (cationic amino acid transporter, y+ system), member 5    |
| -2.82 | Slc9a2     | NM_001033289       | solute carrier family 9 (sodium/hydrogen exchanger), member 2                     |
| 4.39  | Slc9a3     | NM_001081060       | solute carrier family 9 (sodium/hydrogen exchanger), member 3                     |
| 4.16  | Slfn2      | NM_011408          | schlafen 2                                                                        |
| 4.3   | Slfn4      | NM_011410          | schlafen 4                                                                        |
| 6.9   | Slfn5      | NM_183201          | schlafen 5                                                                        |
| 1.73  | Smad4      | NM_008540          | MAD homolog 4 (Drosophila)                                                        |
| 1.71  | Snd1       | NM_019776          | staphylococcal nuclease and tudor domain containing 1                             |
| 2.02  | Snhg1      | AK051045           | 9 days embryo whole body cDNA, snoRNA host gene (UHG) gene                        |
| 1.89  | Snora44    | NR_034050          | small nucleolar RNA, H/ACA box 44, small nucleolar RNA.                           |
| 2.12  | Snord118   | NR_028566          | small nucleolar RNA, C/D box 118, small nucleolar RNA.                            |
| 2.19  | Snord14c   | NR_028276          | small nucleolar RNA, C/D box 14C, small nucleolar RNA.                            |
| 3.1   | Snord14e   | NR_028275          | small nucleolar RNA, C/D box 14E, small nucleolar RNA.                            |
| 1.73  | Snord32a   | NR_000002          | small nucleolar RNA, C/D box 32A, small nucleolar RNA.                            |
| 1.97  | Snord33    | NR_001277          | small nucleolar RNA, C/D box 33, small nucleolar RNA.                             |
| 1.7   | Snord35b   | NR_000004          | small nucleolar RNA, C/D box 35B, small nucleolar RNA.                            |
| 1.79  | Snord52    | NR_028527          | small nucleolar RNA, C/D box 52, small nucleolar RNA.                             |
| 2.38  | Snord53    | NR_028551          | small nucleolar RNA, C/D box 53, small nucleolar RNA.                             |
| 1.93  | Snrpd3     | NM_026095          | small nuclear ribonucleoprotein D3                                                |
| 2.01  | Snx10      | NM_028035          | sorting nexin 10, transcript variant 1                                            |
| -1.84 | Snx16      | NM_029068          | sorting nexin 16, transcript variant 1                                            |
| 3.26  | Socs3      | U72673             | EF-10 mRNA, complete cds.                                                         |
| 3.83  | Socs3      | NM_007707          | suppressor of cytokine signaling 3                                                |
| -2.09 | Sord       | NM_146126          | sorbitol dehydrogenase                                                            |
| 2.59  | Sp100      | NM_013673          | nuclear antigen                                                                   |
| 2.28  | Sp110      | NM_175397          | nuclear body protein                                                              |
| 1.76  | Spats2l    | NM_144882          | spermatogenesis associated, serine-rich 2-like, transcript variant 1              |
| -2.64 | Sprr1a     | NM_009264          | small proline-rich protein 1A                                                     |
| 1.63  | Sptlc2     | NM_011479          | serine palmitoyltransferase, long chain base subunit 2                            |
| -2.63 | Srd5a1     | NM_175283          | steroid 5 alpha-reductase 1                                                       |
| 1.75  | Srgn       | NM_011157          | serglycin                                                                         |
| 2.26  | Srm        | NM_009272          | spermidine synthase                                                               |
| -1.77 | St3gal1    | NM_009177          | ST3 beta-galactoside alpha-2,3-sialyltransferase 1                                |
| -2.35 | St6galnac1 | NM_011371          | ST6                                                                               |
| -2.22 | Stap1      | NM_019992          | signal transducing adaptor family member 1                                        |
| -1.66 | Stard4     | NM_133774          | StAR-related lipid transfer (START) domain containing 4                           |
| 4.7   | Stat1      | NM_009283          | signal transducer and activator of transcription 1                                |
| 4.94  | Stat2      | NM_019963          | signal transducer and activator of transcription 2                                |
| 1.71  | Stat3      | NM_213659          | signal transducer and activator of transcription 3, transcript variant 1          |
| 2.05  | Steap4     | NM_054098          | STEAP family member 4                                                             |
| 1.74  | Stip1      | NM_016737          | stress-induced phosphoprotein 1                                                   |
| 4.91  | Stom       | NM_013515          | stomatin                                                                          |
| -2.26 | Ston2      | NM_175367          | stonin 2                                                                          |
| -2.36 | Strbp      | NM_009261          | spermatid perinuclear RNA binding protein                                         |
| -1.85 | Sult1d1    | NM_016771          | sulfotransferase family 1D, member 1                                              |
| 2.16  | Suv39h1    | NM_011514          | suppressor of variegation 3-9 homolog 1 (Drosophila)                              |
| -2.06 | Swap70     | NM_009302          | SWA-70 protein                                                                    |
| -1.76 | Synn       | NM_201639          | synemin, intermediate filament protein, transcript variant 1                      |
| 2.47  | Tac1       | NM_009311          | tachykinin 1                                                                      |
| 1.86  | Taf13      | NM_025444          | TAF13 RNA polymerase II, TATA box binding protein (TBP)-associated factor         |
| 2.16  | Taf1a      | NM_021466          | TATA box binding protein (Tbp)-associated factor, RNA polymerase I, A             |
| -1.86 | Tagln2     | NM_178598          | transgelin 2                                                                      |
| 4.63  | Tap1       | NM_013683          | transporter 1, ATP-binding cassette, sub-family B (MDR/TAP), transcript variant 1 |
| 2.15  | Tars       | NM_033074          | threonyl-tRNA synthetase                                                          |
| 7.04  | Tat        | NM_146214          | tyrosine aminotransferase, nuclear gene encoding mitochondrial protein            |
| 1.72  | Tbk1       | NM_019786          | TANK-binding kinase 1                                                             |
| 2.27  | Tcrg-V3    | ENSMUST00000103558 | T-cell receptor gamma chain C region C7.5 gene:ENSMUSG00000076749                 |
| -1.76 | Tet1       | NM_027384          | tet oncogene 1                                                                    |
| 2.8   | Tgm2       | NM_009373          | transglutaminase 2, C polypeptide                                                 |
| 9.34  | Tgtp1      | NM_011579          | T-cell specific GTPase 1                                                          |
| 1.65  | Thpo       | NM_009379          | thrombopoietin, transcript variant 1                                              |
| -1.79 | Thrb       | NM_009380          | thyroid hormone receptor beta, transcript variant 2                               |
| 7.96  | Tifa       | NM_145133          | TRAF-interacting protein with forkhead-associated domain                          |
| 2.06  | Tlr2       | NM_011905          | toll-like receptor 2                                                              |
| 2.08  | Tm4sf20    | NM_025453          | transmembrane 4 L six family member 20                                            |
| -4.49 | Tm4sf4     | NM_145539          | transmembrane 4 superfamily member 4                                              |
| -1.67 | Tm4sf5     | NM_029360          | transmembrane 4 superfamily member 5                                              |
| 1.99  | Tmc5       | NM_001105252       | transmembrane channel-like gene family 5, transcript variant 1                    |
| -1.73 | Tmc7       | NM_172476          | transmembrane channel-like gene family 7                                          |
| -2.19 | Tmem117    | NM_178789          | transmembrane protein 117                                                         |
| -1.84 | Tmem135    | NM_028343          | transmembrane protein 135                                                         |
| -2.92 | Tmem144    | NM_027495          | transmembrane protein 144                                                         |
| -1.66 | Tmem195    | NM_178767          | transmembrane protein 195                                                         |
| 1.82  | Tmem199    | NM_199199          | transmembrane protein 199                                                         |
| -1.78 | Tmem218    | NM_025464          | transmembrane protein 218                                                         |
| 1.84  | Tmem39a    | NM_026407          | transmembrane protein 39a                                                         |
| -2.04 | Tmem43     | NM_028766          | transmembrane protein 43                                                          |
| -1.67 | Tmem62     | NM_175285          | transmembrane protein 62                                                          |
| -2.13 | Tmem86a    | NM_026436          | transmembrane protein 86A                                                         |
| -2.22 | Tmem86b    | NM_023440          | transmembrane protein 86B                                                         |
| 2.43  | Tnfrsf10   | NM_009425          | tumor necrosis factor (ligand) superfamily, member 10                             |
| -2.36 | Tppp       | NM_182839          | tubulin polymerization promoting protein                                          |
| -1.8  | Tppp3      | NM_026481          | tubulin polymerization-promoting protein family member 3                          |
| 1.74  | Tra2a      | AB052758           | mAWMS1 mRNA, complete cds.                                                        |
| 2.15  | Tra2a      | NM_198102          | transformer 2 alpha homolog (Drosophila)                                          |
| 2.49  | Traf1      | NM_001163470       | TRAF type zinc finger domain containing 1, transcript variant 1                   |
| -1.99 | Tram2      | NM_133252          | translocating chain-associating membrane protein 2, transcript variant 1          |
| -3.05 | Trdn       | NM_029726          | triadin                                                                           |

|        |           |                    |                                                                        |
|--------|-----------|--------------------|------------------------------------------------------------------------|
| -1.83  | Trib1     | NM_144549          | tribbles homolog 1 (Drosophila)                                        |
| 2.04   | Trim12a   | NM_023835          | tripartite motif-containing 12A                                        |
| -1.85  | Trim16    | NM_053169          | tripartite motif-containing 16                                         |
| 2.59   | Trim21    | NM_009277          | tripartite motif-containing 21, transcript variant 1                   |
| 4.38   | Trim30a   | NM_009099          | tripartite motif-containing 30A                                        |
| 1.96   | Trim34    | NM_030684          | tripartite motif-containing 34                                         |
| -5.88  | Trim38    | NM_001029935       | tripartite motif-containing 38                                         |
| 1.72   | Trim40    | NM_001033235       | tripartite motif-containing 40, transcript variant 1                   |
| 2.44   | Trim56    | NM_201373          | tripartite motif-containing 56                                         |
| -2.09  | Trp53inp1 | NM_021897          | transformation related protein 53 inducible nuclear protein 1          |
| -1.79  | Trpm4     | NM_175130          | transient receptor potential cation channel, subfamily M, member 4     |
| -2.19  | Trpm6     | NM_153417          | transient receptor potential cation channel, subfamily M, member 6     |
| -1.94  | Tsc22d1   | NM_207652          | TSC22 domain family, member 1, transcript variant 1                    |
| -1.65  | Tsku      | NM_001168541       | tsukushin, transcript variant 1                                        |
| -2.07  | Tspan1    | NM_133681          | tetraspanin 1                                                          |
| -1.84  | Tspan13   | NM_025359          | tetraspanin 13                                                         |
| -2.1   | Tspan5    | NM_019571          | tetraspanin 5                                                          |
| -1.91  | Ttc28     | NM_024477          | tetratricopeptide repeat domain 28                                     |
| 2.12   | Ttc39b    | NM_027238          | tetratricopeptide repeat domain 39B                                    |
| -1.68  | Ttc39c    | NM_028341          | tetratricopeptide repeat domain 39C                                    |
| -3.02  | Tubb2a    | NM_009450          | tubulin, beta 2A                                                       |
| -2.03  | Tubb2b    | NM_023716          | tubulin, beta 2B                                                       |
| -2.15  | Tuft1     | NM_011656          | tuftelin 1                                                             |
| 1.91   | Uap1      | NM_133806          | UDP-N-acetylglucosamine pyrophosphorylase 1                            |
| 1.66   | Ubash3b   | NM_176860          | ubiquitin associated and SH3 domain containing, B                      |
| 1.85   | Ube2g2    | NM_019803          | ubiquitin-conjugating enzyme E2G 2                                     |
| -2.07  | Ubxn2a    | NM_145441          | UBX domain protein 2A                                                  |
| 2.5    | Uck2      | ENSMUST00000053... | Uck2 protein (Fragment) gene:ENSMUSG00000053664                        |
| -1.68  | Ugcg      | NM_011673          | UDP-glucose ceramide glucosyltransferase                               |
| -2.29  | Ugdh      | NM_009466          | UDP-glucose dehydrogenase                                              |
| 1.69   | Ugt1      | NM_198899          | UDP-glucose glycoprotein glucosyltransferase 1                         |
| -1.79  | Ugt1a9    | NM_201644          | UDP glucuronosyltransferase 1 family, polypeptide A9                   |
| -4.34  | Ugt2a3    | NM_028094          | UDP glucuronosyltransferase 2 family, polypeptide A3                   |
| -2.19  | Ugt2b34   | NM_153598          | UDP glucuronosyltransferase 2 family, polypeptide B34                  |
| -2.58  | Ugt2b36   | NM_001029867       | UDP glucuronosyltransferase 2 family, polypeptide B36                  |
| 2.19   | Unc5cl    | NM_152823          | unc-5 homolog C (C. elegans)-like                                      |
| 2.23   | Upk1b     | NM_178924          | uroplakin 1B                                                           |
| 2.36   | Upp1      | NM_009477          | uridine phosphorylase 1, transcript variant 1                          |
| 7.99   | Usp18     | NM_011909          | ubiquitin specific peptidase 18                                        |
| 2.51   | Usp31     | NM_001033173       | ubiquitin specific peptidase 31                                        |
| 1.84   | Usp1      | NM_001115153       | ubiquitin specific peptidase like 1, transcript variant 1              |
| -1.89  | Vdr       | NM_009504          | vitamin D receptor                                                     |
| 1.93   | Vegfa     | NM_001025250       | vascular endothelial growth factor A, transcript variant 1             |
| -1.77  | Vldlr     | NM_013703          | very low density lipoprotein receptor, transcript variant 1            |
| -1.89  | Vmn1r45   | NM_011684          | vomeronasal 1 receptor 45                                              |
| 1.82   | Vps45     | NM_013841          | vacuolar protein sorting 45 (yeast)                                    |
| 2.62   | Vwa5a     | NM_172767          | von Willebrand factor A domain containing 5A                           |
| 3.24   | Wars      | NM_001164314       | tryptophanyl-tRNA synthetase, transcript variant 2                     |
| -1.78  | Wdfy1     | NM_001111279       | WD repeat and FYVE domain containing 1, transcript variant 1           |
| 2.07   | Wdr77     | NM_027432          | WD repeat domain 77                                                    |
| 4.37   | Xaf1      | NM_001037713       | XIAP associated factor 1                                               |
| 1.93   | Xdh       | NM_011723          | xanthine dehydrogenase                                                 |
| -49... | Xist      | NR_001463          | inactive X specific transcripts, transcript variant 1, non-coding RNA. |
| -1.83  | Xk        | NM_023500          | Kell blood group precursor (McLeod phenotype) homolog                  |
| 2.0    | Xpot      | NM_001081056       | exportin, tRNA (nuclear export receptor for tRNAs)                     |
| 2.92   | Yars      | NM_134151          | tyrosyl-tRNA synthetase                                                |
| -1.8   | Ypel5     | NM_027166          | yippee-like 5 (Drosophila)                                             |
| 10.13  | Zbp1      | NM_021394          | Z-DNA binding protein 1, transcript variant 1                          |
| 2.64   | Zbtb16    | NM_001033324       | zinc finger and BTB domain containing 16                               |
| 1.75   | Zdhhc13   | NM_028031          | zinc finger, DHHC domain containing 13                                 |
| 2.6    | Zdhhc15   | NM_175358          | zinc finger, DHHC domain containing 15                                 |
| -1.71  | Zfand2a   | NM_133349          | zinc finger, AN1-type domain 2A, transcript variant 1                  |
| -1.72  | Zfand6    | NM_022985          | zinc finger, AN1-type domain 6                                         |
| -1.65  | Zfp326    | NM_018759          | zinc finger protein 326, transcript variant 1                          |
| 1.68   | Zfp330    | NM_145600          | zinc finger protein 330                                                |
| -1.7   | Zfp780b   | NM_001081021       | zinc finger protein 780B                                               |
| 2.34   | Znfx1     | NM_001033196       | zinc finger, NFX1-type containing 1                                    |
| -2.05  | Zranb1    | ENSMUST00000106... | Ubiquitin thioesterase Zranb1 gene:ENSMUSG00000030967                  |

**Figure S3C** -Effect of both *Lactobacillus* on host response during *Lm* infection

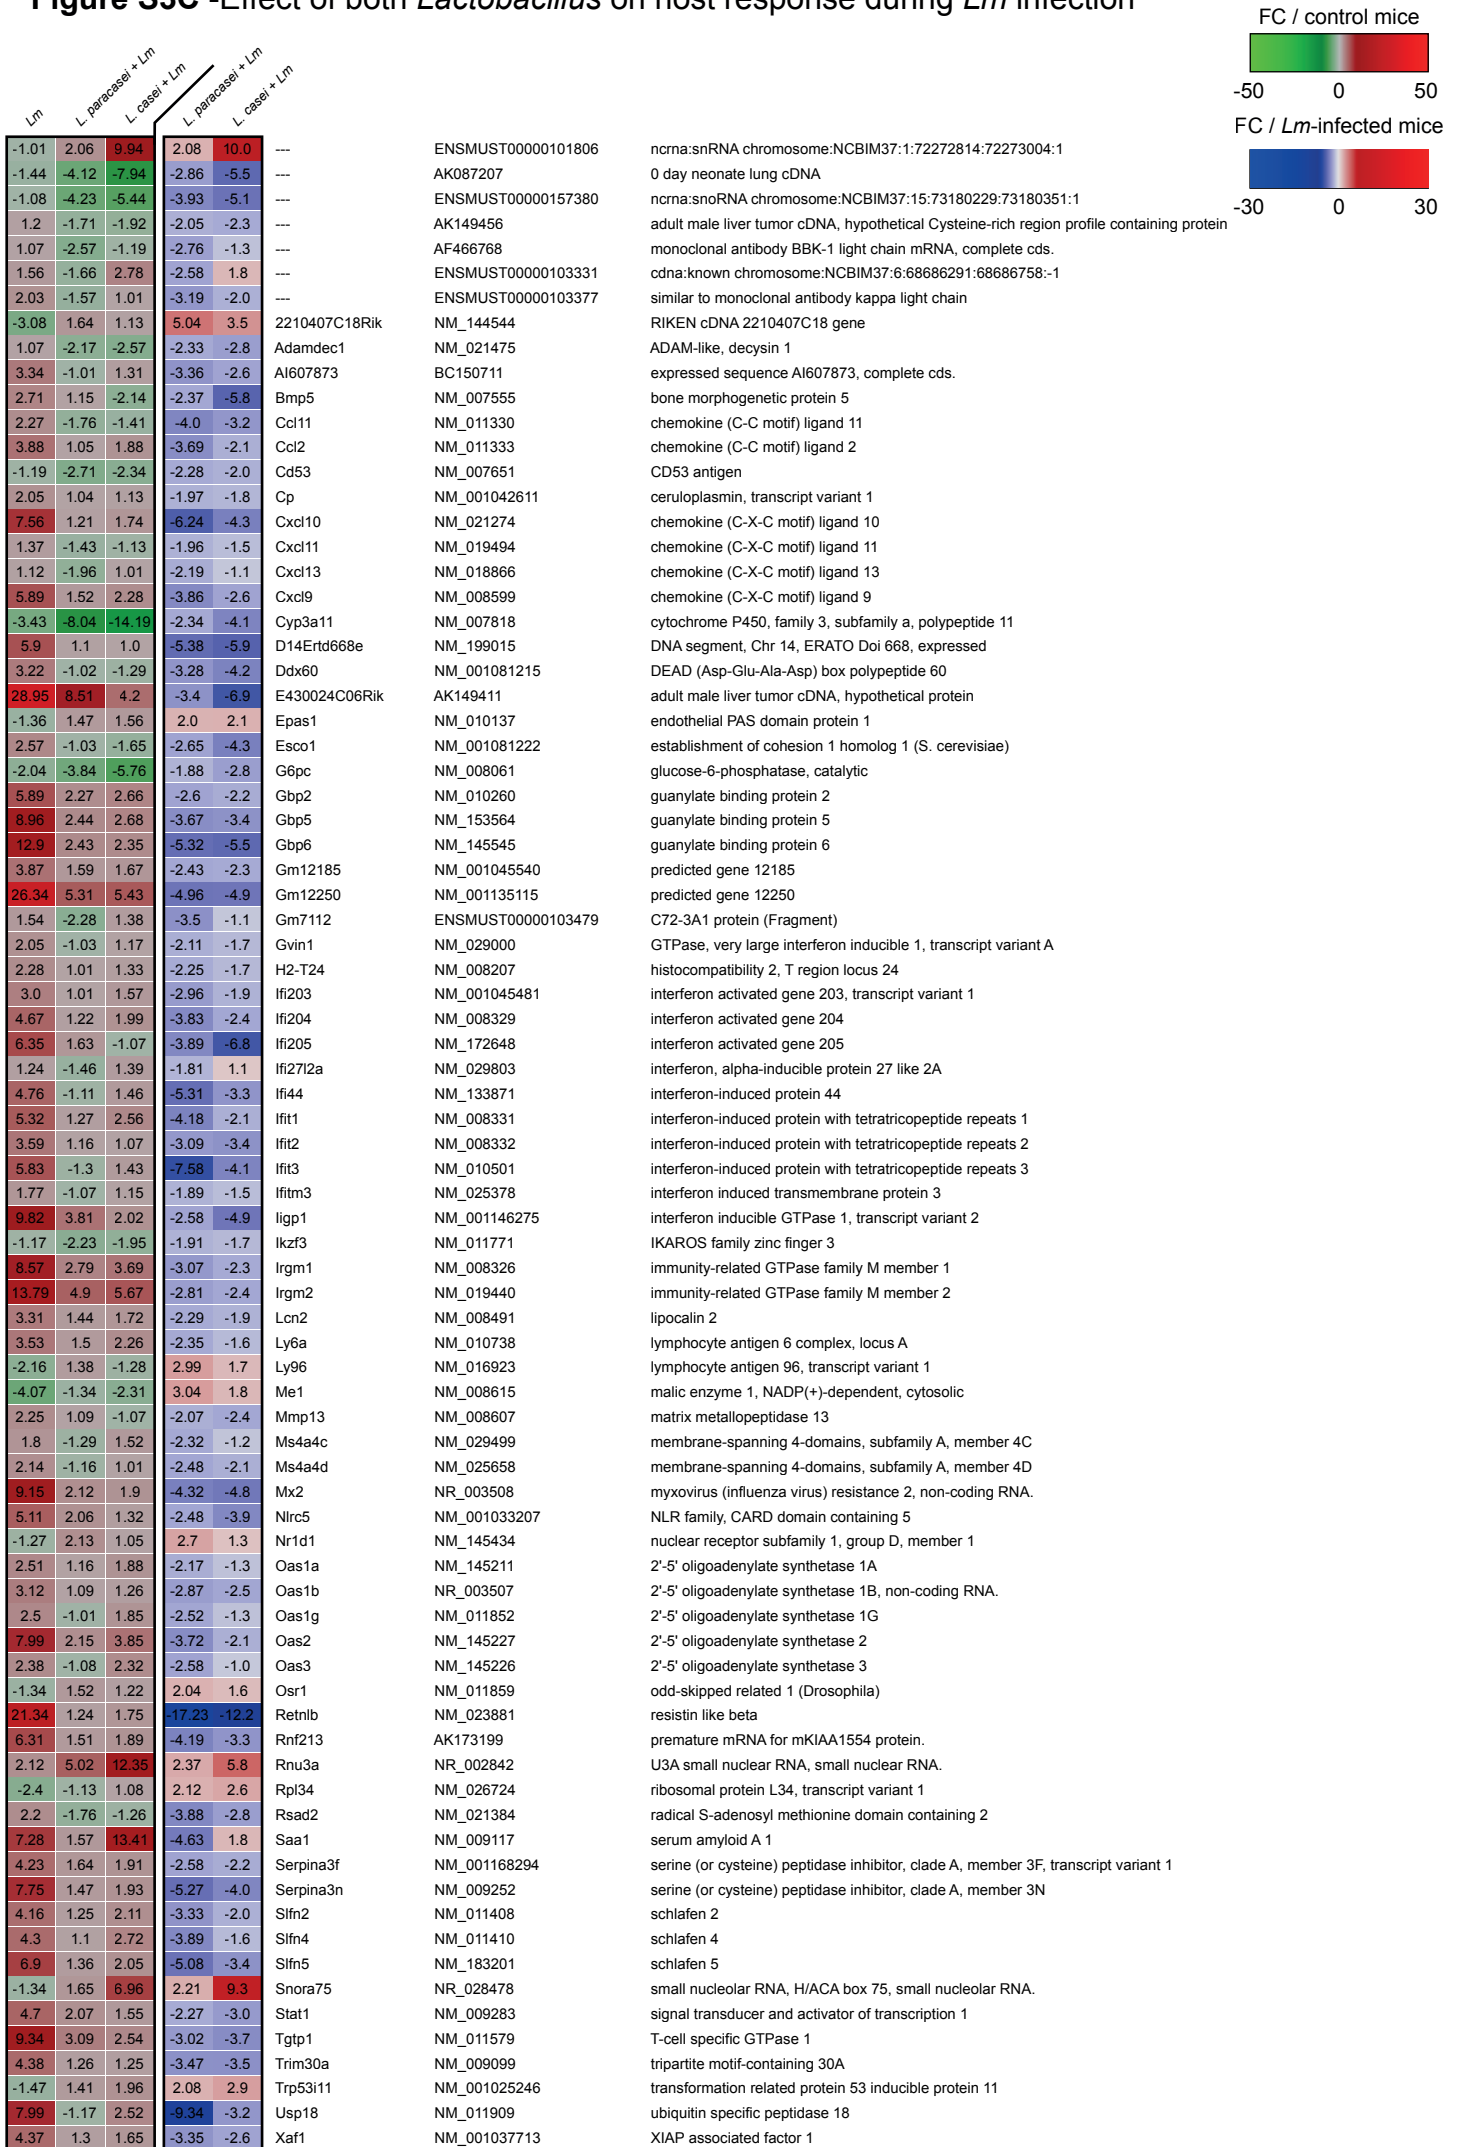

Figure S3D -Effect of *L. paracasei* on host response during *Lm* infection

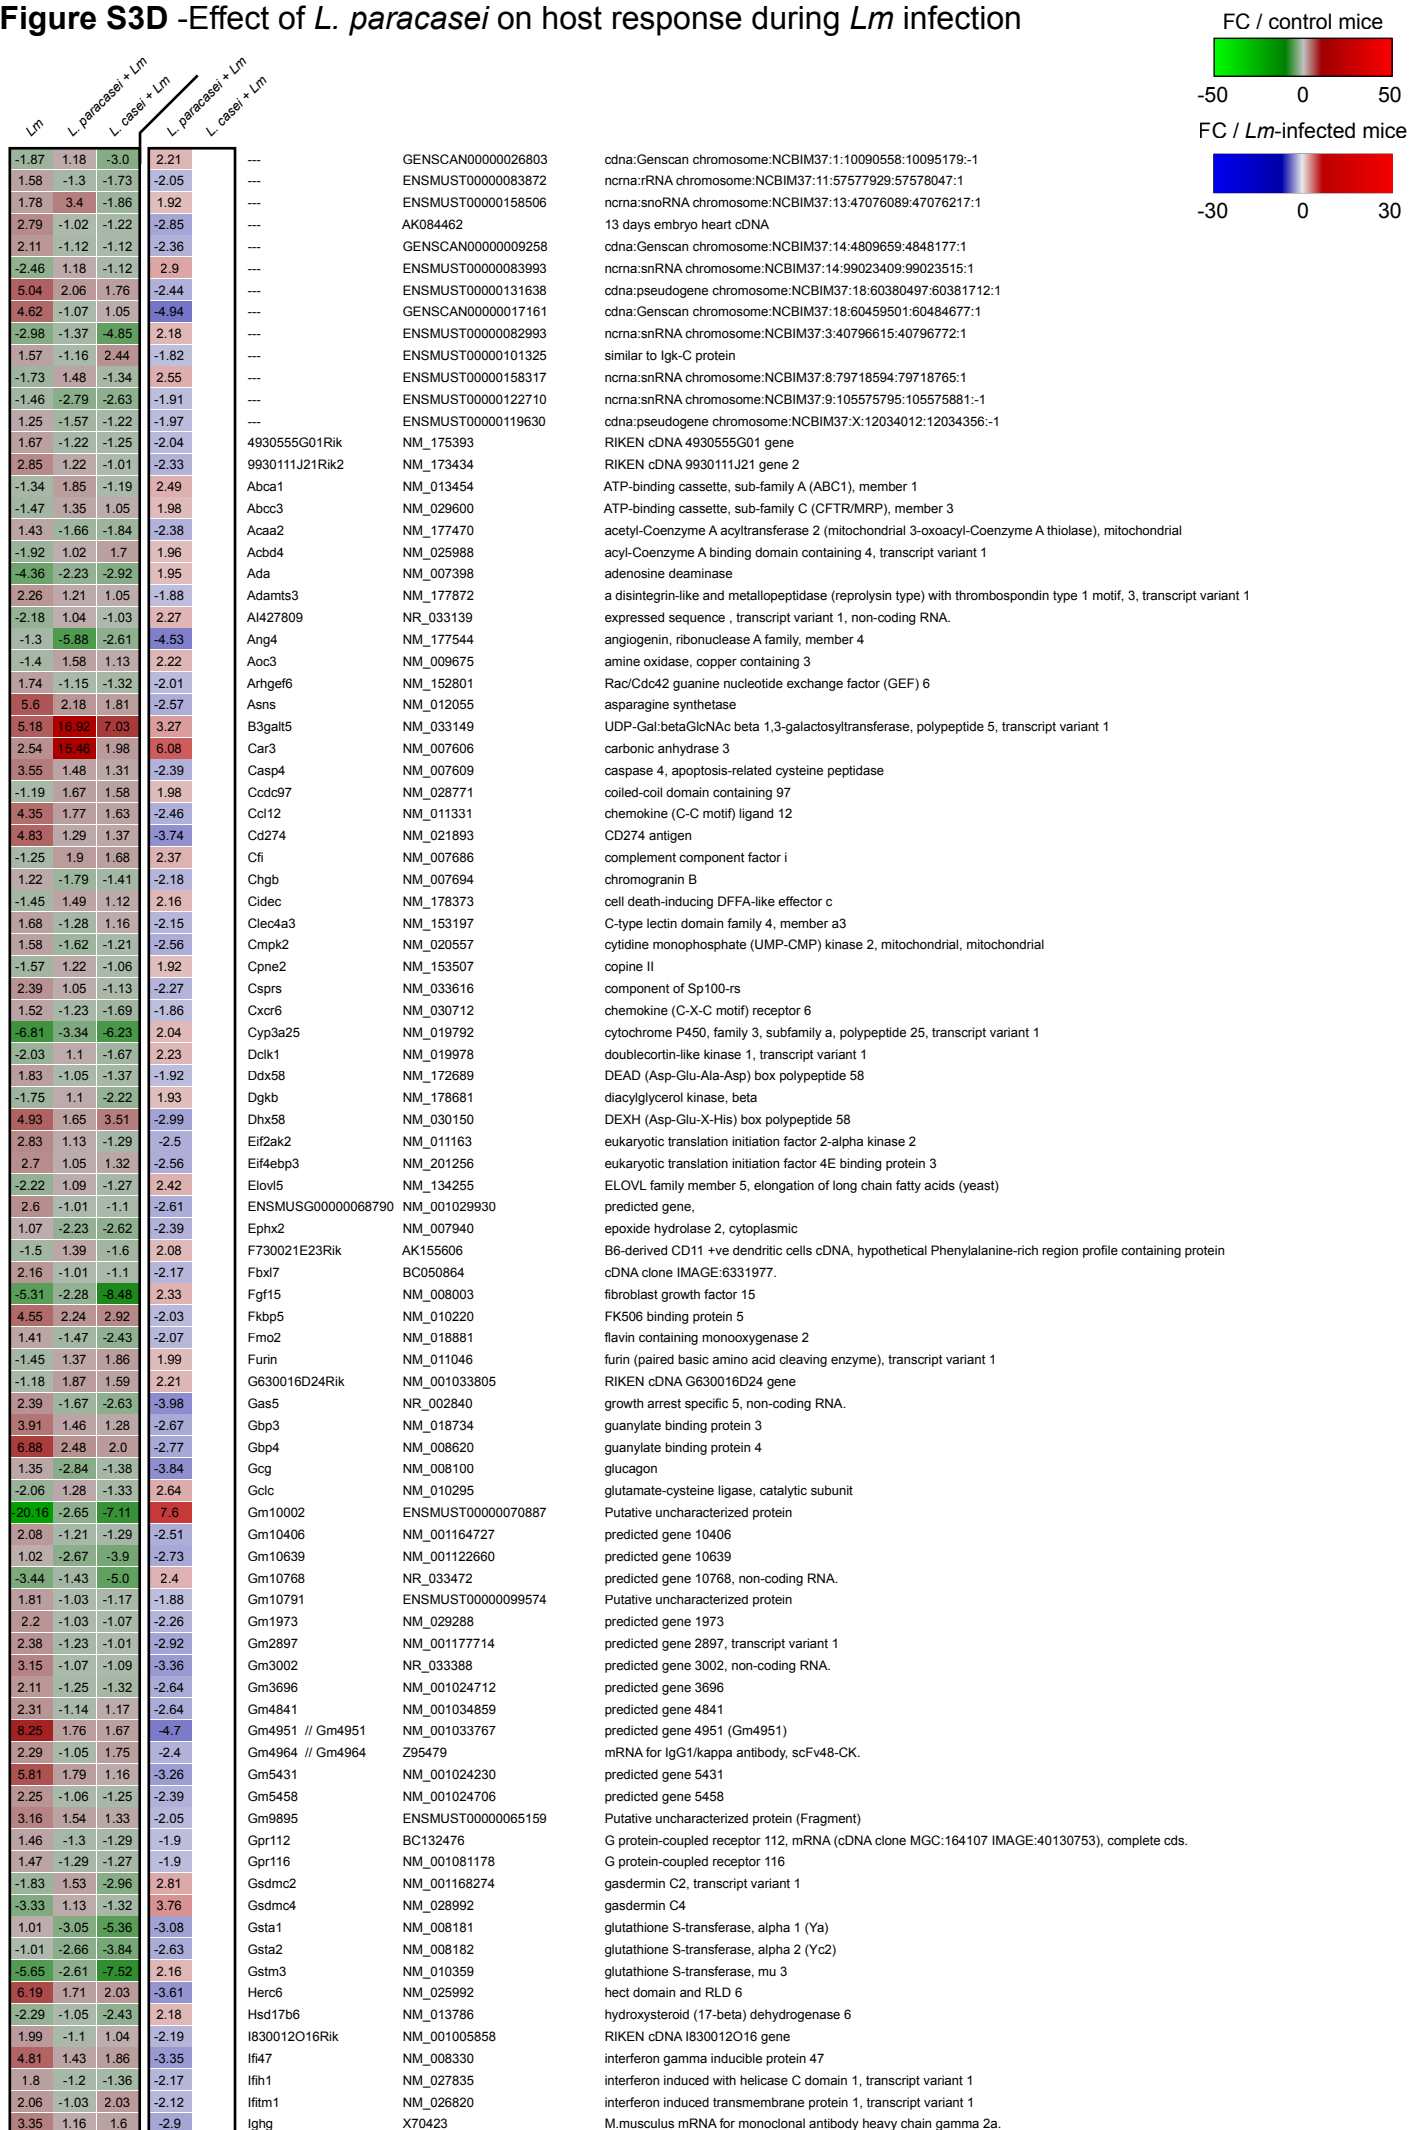

Lm  
 L. paracasei + Lm  
 L. casei + Lm  
 L. paracasei + Lm  
 L. casei + Lm

|       |       |       |       |              |              |                                                                                          |
|-------|-------|-------|-------|--------------|--------------|------------------------------------------------------------------------------------------|
| 2.5   | 1.3   | 2.09  | -1.92 | Il18bp       | NM_010531    | interleukin 18 binding protein                                                           |
| 2.51  | 5.02  | 2.23  | 2.0   | Il33         | NM_001164724 | interleukin 33, transcript variant 1                                                     |
| 1.74  | -1.08 | 1.06  | -1.87 | Il7          | NM_008371    | interleukin 7                                                                            |
| 3.52  | -1.08 | 2.94  | -3.8  | Isg15        | NM_015783    | ISG15 ubiquitin-like modifier                                                            |
| 1.98  | -1.02 | -1.63 | -2.02 | Lars         | NM_134137    | leucyl-tRNA synthetase                                                                   |
| -1.37 | 1.37  | -1.14 | 1.88  | Lasp1        | NM_010688    | LIM and SH3 protein 1                                                                    |
| -1.27 | -2.96 | -1.42 | -2.33 | LOC100503984 | XR_107221    | PREDICTED: hypothetical , transcript variant 11, partial miscRNA.                        |
| -3.31 | -1.53 | -1.49 | 2.17  | Loxl2        | NM_033325    | lysyl oxidase-like 2                                                                     |
| -5.42 | -1.61 | -3.49 | 3.38  | Lrat         | NM_023624    | lecithin-retinol acyltransferase (phosphatidylcholine-retinol-O-acyltransferase)         |
| 1.28  | -1.45 | -1.31 | -1.86 | Me3          | NM_181407    | malic enzyme 3, NADP(+)-dependent, mitochondrial, mitochondrial                          |
| -2.73 | -1.42 | -1.98 | 1.92  | Mettl7a1     | NM_027334    | methyltransferase like 7A1                                                               |
| -1.22 | -3.15 | -1.67 | -2.58 | Mir703       | NR_030484    | microRNA 703, microRNA.                                                                  |
| 3.39  | 1.48  | 1.16  | -2.29 | Miki         | NM_029005    | mixed lineage kinase domain-like                                                         |
| 1.86  | -1.12 | 1.68  | -2.08 | Mmp7         | NM_010810    | matrix metalloproteinase 7                                                               |
| 1.26  | -2.93 | -1.54 | -3.68 | Mmm1         | NM_027613    | multimerin 1, transcript variant 1                                                       |
| 8.89  | 2.28  | 2.1   | -3.81 | Mpa2l        | NM_194336    | macrophage activation 2 like                                                             |
| 1.86  | -1.25 | -1.19 | -2.34 | Ms4a6b       | NM_027209    | membrane-spanning 4-domains, subfamily A, member 6B                                      |
| 2.17  | 1.2   | 1.3   | -1.8  | Msr1         | NM_031195    | macrophage scavenger receptor 1, transcript variant 1                                    |
| 4.01  | 1.42  | 1.22  | -2.83 | Mthfd2       | NM_008638    | methylenetetrahydrofolate dehydrogenase (NAD+ dependent), mitochondrial                  |
| -1.01 | -2.04 | -2.61 | -2.03 | Mzt1         | NM_175245    | mitotic spindle organizing protein 1                                                     |
| -1.47 | 2.27  | -1.51 | 3.34  | Naaladl2     | XM_975226    | PREDICTED: N-acetylated alpha-linked acidic dipeptidase-like 2, transcript variant 2     |
| 2.62  | 1.13  | -1.15 | -2.32 | Nampt        | NM_021524    | nicotinamide phosphoribosyltransferase                                                   |
| 16.71 | 6.76  | 8.42  | -2.47 | Nos2         | NM_010927    | nitric oxide synthase 2, inducible                                                       |
| -1.97 | 1.0   | -1.29 | 1.97  | Npc1l1       | NM_207242    | NPC1-like 1                                                                              |
| 1.69  | -1.56 | -1.92 | -2.63 | Nt5c3        | NM_026004    | 5'-nucleotidase, cytosolic III                                                           |
| 1.55  | -1.34 | 1.19  | -2.08 | Oas1         | NM_145209    | 2'-5' oligoadenylate synthetase-like 1                                                   |
| 2.38  | 1.12  | 1.14  | -2.13 | Oas2         | NM_011854    | 2'-5' oligoadenylate synthetase-like 2                                                   |
| 2.71  | 1.27  | 1.08  | -2.13 | Osmr         | NM_011019    | oncostatin M receptor                                                                    |
| 2.84  | 1.45  | 1.58  | -1.95 | Pappa        | NM_021362    | pregnancy-associated plasma protein A                                                    |
| 2.61  | 1.03  | -1.34 | -2.53 | Parp14       | NM_001039530 | poly (ADP-ribose) polymerase family, member 14                                           |
| 3.01  | 1.07  | 1.06  | -2.81 | Pcdh9        | NM_001081377 | protocadherin 9                                                                          |
| -1.79 | 1.06  | -1.69 | 1.9   | Pcp4         | NM_008791    | Purkinje cell protein 4                                                                  |
| -1.73 | 1.11  | -1.92 | 1.92  | Pcp4l1       | NM_025557    | Purkinje cell protein 4-like 1                                                           |
| -1.89 | 1.13  | -2.37 | 2.13  | Pcyox1       | NM_025823    | prenylcysteine oxidase 1                                                                 |
| -2.11 | 1.01  | -1.98 | 2.13  | Pglyrp1      | NM_009402    | peptidoglycan recognition protein 1                                                      |
| -1.3  | 1.44  | 1.22  | 1.87  | Plau         | NM_008873    | plasminogen activator, urokinase                                                         |
| -4.83 | -1.85 | -3.65 | 2.62  | Pmp22        | NM_008885    | peripheral myelin protein 22                                                             |
| -2.65 | -5.94 | -3.21 | -2.24 | Pln1pp2      | NM_011128    | pancreatic lipase-related protein 2                                                      |
| 4.65  | 1.26  | 1.53  | -3.69 | Psa1         | NM_177420    | phosphoserine aminotransferase 1                                                         |
| 3.58  | 1.49  | 2.34  | -2.39 | Psmb9        | NM_013585    | proteasome (prosome, macropain) subunit, beta type 9 (large multifunctional peptidase 2) |
| -1.27 | 1.54  | -1.61 | 1.96  | Ptpn3        | NM_011207    | protein tyrosine phosphatase, non-receptor type 3                                        |
| 4.28  | 2.11  | 4.82  | -2.03 | Rasd1        | NM_009026    | RAS, dexamethasone-induced 1                                                             |
| -2.9  | -1.5  | -3.24 | 1.93  | Reps2        | NM_178256    | RALBP1 associated Eps domain containing protein 2                                        |
| 1.3   | -1.6  | -2.04 | -2.07 | Rfx6         | NM_001159389 | regulatory factor X, 6, transcript variant 1                                             |
| -3.27 | 1.25  | -2.92 | 4.07  | Rgs13        | NM_153171    | regulator of G-protein signaling 13                                                      |
| 1.55  | -1.42 | -1.59 | -2.2  | Rnase1       | NM_011271    | ribonuclease, RNase A family, 1 (pancreatic)                                             |
| 2.76  | -1.07 | 1.02  | -2.96 | Rtp4         | NM_023386    | receptor transporter protein 4                                                           |
| 2.23  | 1.12  | -1.14 | -2.0  | Samhd1       | NM_018851    | SAM domain and HD domain, 1, transcript variant 1                                        |
| -3.34 | 2.25  | -2.13 | 7.51  | Scd1         | NM_009127    | stearoyl-Coenzyme A desaturase 1                                                         |
| -2.49 | -1.23 | -1.35 | 2.03  | Serinc3      | NM_012032    | serine incorporator 3                                                                    |
| -3.15 | -1.27 | -3.42 | 2.49  | Slc17a5      | NM_172773    | solute carrier family 17 (anion/sugar transporter), member 5                             |
| -1.92 | 1.05  | 1.16  | 2.02  | Slc39a4      | NM_028064    | solute carrier family 39 (zinc transporter), member 4                                    |
| 1.12  | 2.58  | 2.74  | 2.29  | Slc40a1      | NM_016917    | solute carrier family 40 (iron-regulated transporter), member 1                          |
| 2.55  | -1.11 | 1.29  | -2.83 | Slc7a11      | NM_011990    | solute carrier family 7 (cationic amino acid transporter, y+ system), member 11          |
| -2.82 | -1.09 | -2.23 | 2.58  | Slc9a2       | NM_001033289 | solute carrier family 9 (sodium/hydrogen exchanger), member 2                            |
| 2.59  | -1.19 | -1.26 | -3.08 | Sp100        | NM_013673    | nuclear antigen                                                                          |
| 1.76  | -1.28 | -1.21 | -2.25 | Spats2l      | NM_144882    | spermatogenesis associated, serine-rich 2-like, transcript variant 1                     |
| -2.64 | -1.29 | -1.86 | 2.05  | Sprr1a       | NM_009264    | small proline-rich protein 1A                                                            |
| 4.94  | 2.19  | 1.69  | -2.25 | Stat2        | NM_019963    | signal transducer and activator of transcription 2                                       |
| 2.47  | -1.3  | -1.05 | -3.2  | Tac1         | NM_009311    | tachykinin 1                                                                             |
| 4.63  | 2.34  | 4.62  | -1.98 | Tap1         | NM_013683    | transporter 1, ATP-binding cassette, sub-family B (MDR/TAP), transcript variant 1        |
| -2.92 | -1.35 | -3.77 | 2.16  | Tmem144      | NM_027495    | transmembrane protein 144                                                                |
| 2.43  | 1.18  | 1.26  | -2.06 | Tnfsf10      | NM_009425    | tumor necrosis factor (ligand) superfamily, member 10                                    |
| 2.82  | -1.04 | 1.29  | -2.94 | Trdn         | NM_029726    | triadin                                                                                  |
| 2.04  | -1.03 | -1.5  | -2.1  | Trim12a      | NM_023835    | tripartite motif-containing 12A                                                          |
| 1.96  | -1.1  | -1.16 | -2.16 | Trim34       | NM_030684    | tripartite motif-containing 34                                                           |
| -1.2  | 1.68  | 1.07  | 2.02  | Tubb3        | NM_023279    | tubulin, beta 3                                                                          |
| 2.51  | 1.39  | 1.57  | -1.8  | Usp31        | NM_001033173 | ubiquitin specific peptidase 31                                                          |
| 1.52  | -1.57 | -1.44 | -2.39 | Zufsp        | NM_028287    | zinc finger with UFM1-specific peptidase domain                                          |



**Figure S3E -Effect of *L. casei* on host response during *Lm* infection**

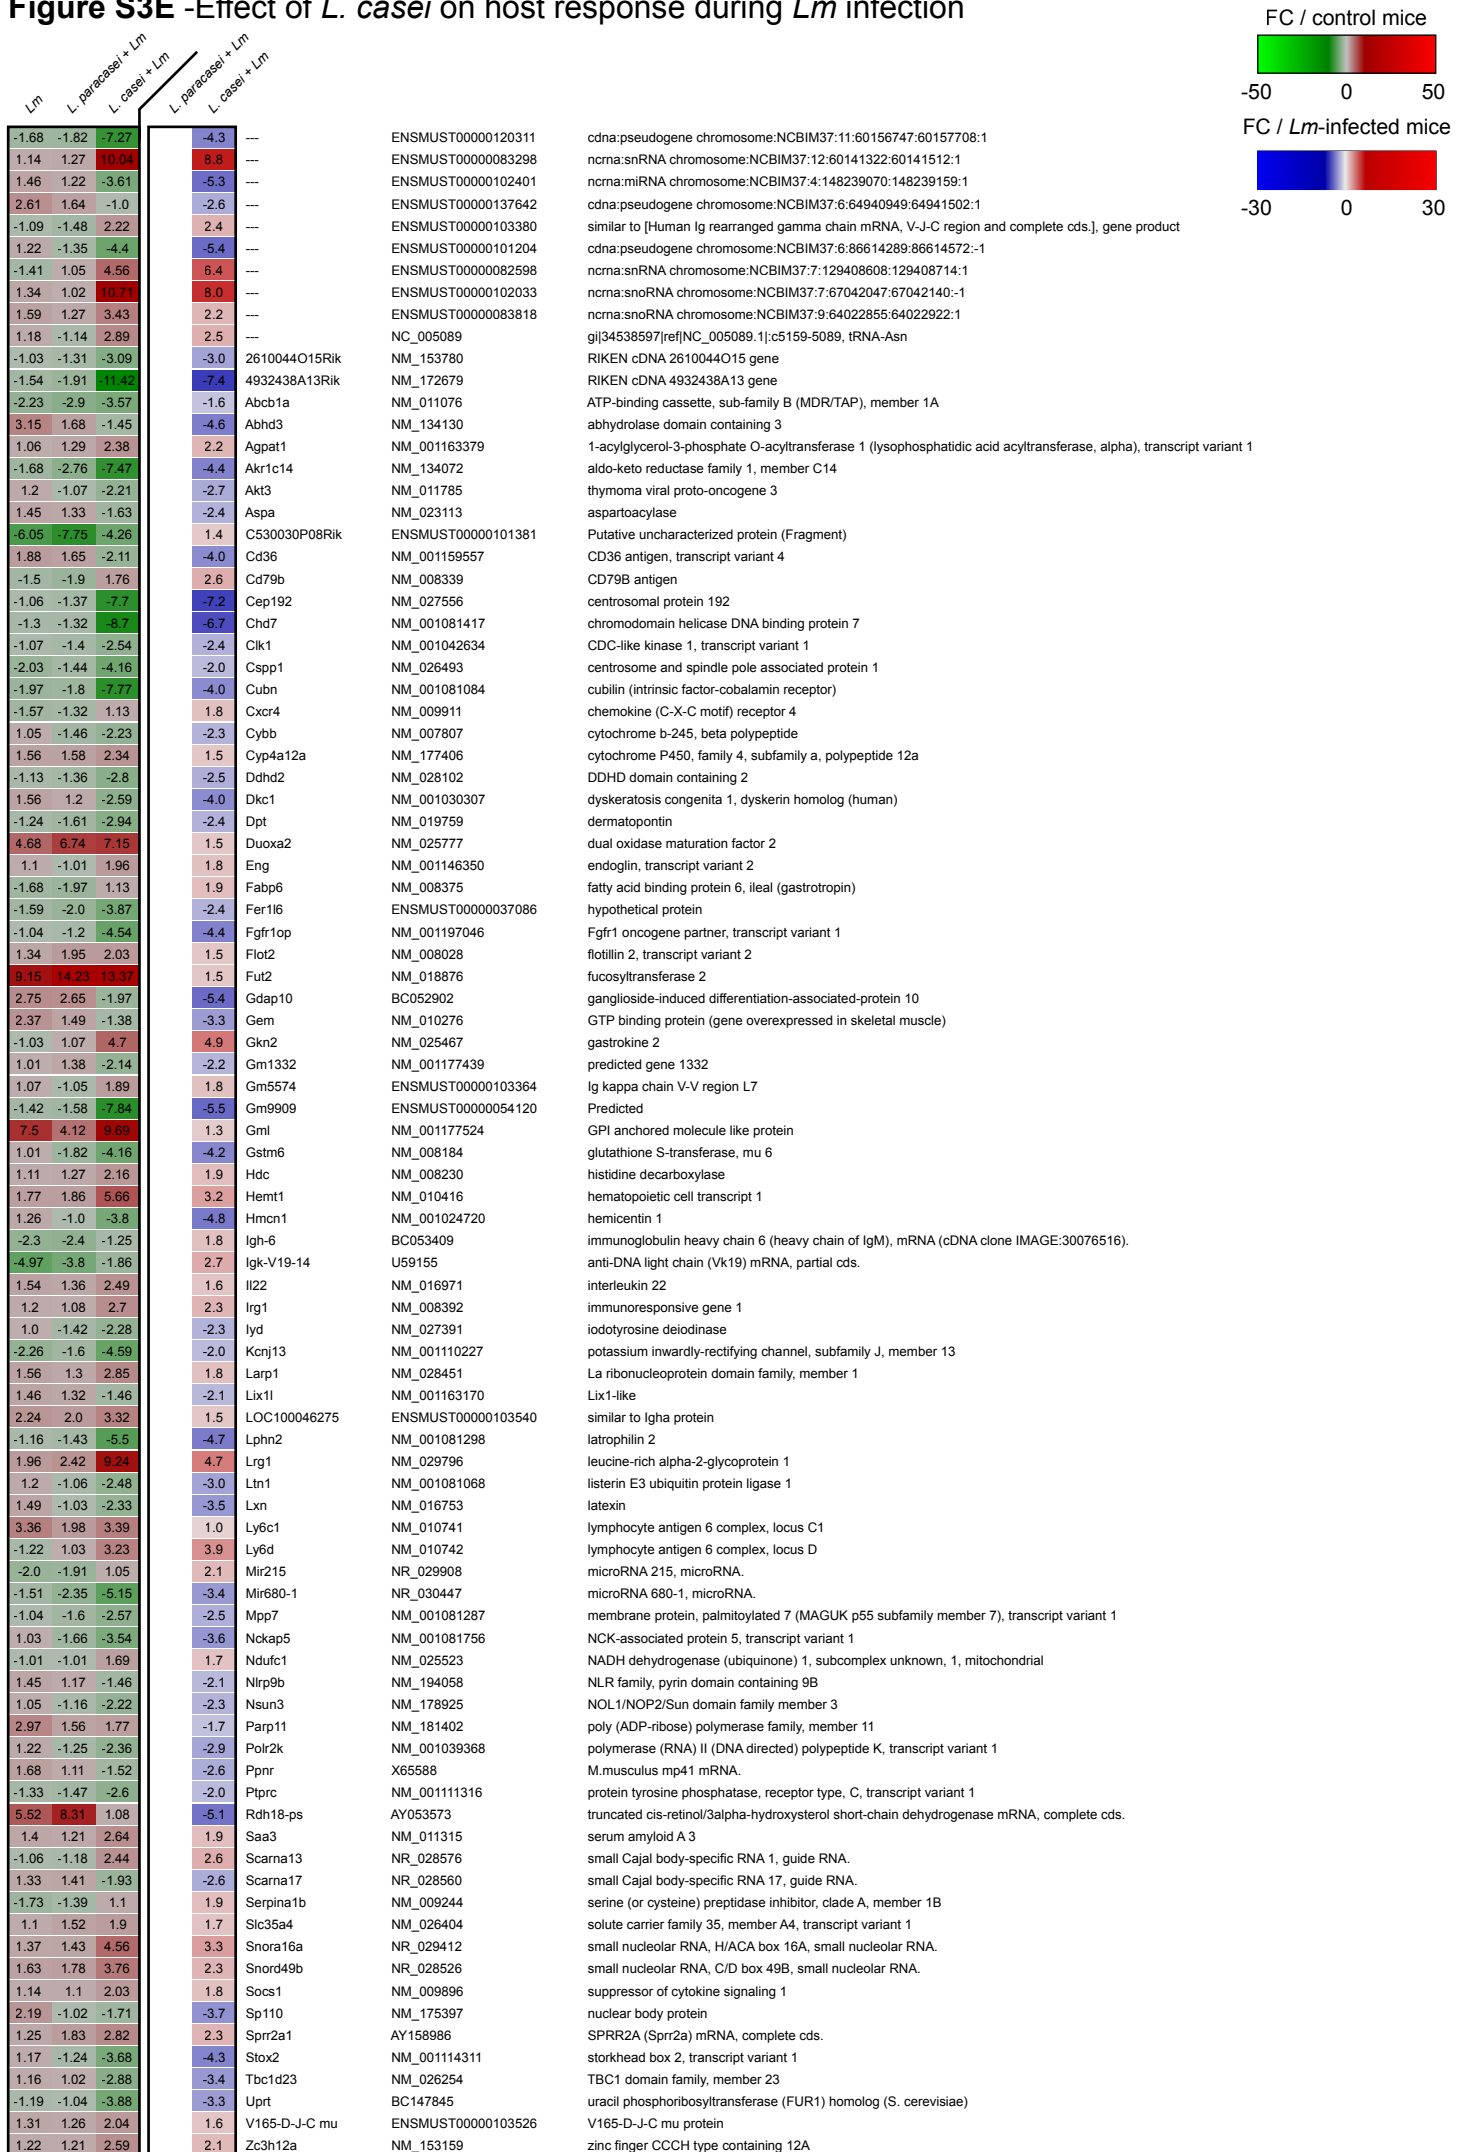

Supplement: 1212809109_sfig03.pdf [file 1212809109_sfig03.pdf]
