# Supplementary material
Source: PubMed Central journal article supplement (PMC3478606)
Supplement: 1212809109_sfig04.pdf [file 1212809109_sfig04.pdf]

Figure S4

A

| Ingenuity Canonical Pathways                        | p-value  | Molecules                            |
|-----------------------------------------------------|----------|--------------------------------------|
| LXR/RXR Activation                                  | 1.45E-07 | CD14,CD36,C3,LPL,SCD,NOS2,TF         |
| Tryptophan Metabolism                               | 9.55E-04 | CCBL1,CYP2B6,CYP3A4,CYP2E1           |
| PXR/RXR Activation                                  | 1.45E-03 | CYP2B6,CYP3A4,SCD                    |
| Linoleic Acid Metabolism                            | 1.95E-03 | CYP2B6,CYP3A4,CYP2E1                 |
| Xenobiotic Metabolism Signaling                     | 2.34E-03 | CYP2B6,CYP3A4,Ces1b/Ces1c,Ces1g,NOS2 |
| Metabolism of Xenobiotics by Cytochrome P450        | 3.47E-03 | CYP2B6,CYP3A4,CYP2E1                 |
| B Cell Development                                  | 3.80E-03 | CD79B,Igk-V28                        |
| Glycerolipid Metabolism                             | 4.07E-03 | LPL,DGKB,PNLIPRP2                    |
| Complement System                                   | 4.07E-03 | CFD,C3                               |
| LPS/IL-1 Mediated Inhibition of RXR Function        | 5.13E-03 | CD14,CYP2B6,CYP3A4,FABP4             |
| Fatty Acid Metabolism                               | 6.76E-03 | CYP2B6,CYP3A4,CYP2E1                 |
| Nitrogen Metabolism                                 | 7.24E-03 | CA3,CA5B                             |
| Arachidonic Acid Metabolism                         | 7.59E-03 | CYP2B6,CYP3A4,CYP2E1                 |
| MIF Regulation of Innate Immunity                   | 1.07E-02 | CD14,NOS2                            |
| Bile Acid Biosynthesis                              | 1.35E-02 | CYP3A4,CYP2E1                        |
| Hepatic Fibrosis / Hepatic Stellate Cell Activation | 1.55E-02 | CD14,CYP2E1,FIGF                     |
| Starch and Sucrose Metabolism                       | 1.58E-02 | PYGL,AMY2A                           |
| Acute Phase Response Signaling                      | 2.29E-02 | C3,HP,TF                             |
| PPAR $\alpha$ /RXR $\alpha$ Activation              | 2.57E-02 | CD36,ADIPOQ,LPL                      |
| TR/RXR Activation                                   | 4.27E-02 | THRSP,HP                             |

B

| Ingenuity Canonical Pathways                    | p-value  | Molecules      |
|-------------------------------------------------|----------|----------------|
| Retinol Metabolism                              | 3.31E-03 | UGT2B17,BMP2   |
| Metabolism of Xenobiotics by Cytochrome P450    | 2.00E-02 | CYP3A4,UGT2B17 |
| Tryptophan Metabolism                           | 3.89E-02 | CCBL1,CYP3A4   |
| Cardiomyocyte Differentiation via BMP Receptors | 4.17E-02 | BMP2           |
| Granzyme A Signaling                            | 4.79E-02 | GZMA           |

C

| Ingenuity Canonical Pathways                                                   | p-value  | Molecules                                                                                                                                                                                                |
|--------------------------------------------------------------------------------|----------|----------------------------------------------------------------------------------------------------------------------------------------------------------------------------------------------------------|
| Metabolism of Xenobiotics by Cytochrome P450                                   | 1.58E-08 | ADH4 (includes EG:127),GSTM5,CYP51A1,CYP2C18,CYP2B6,ALDH1A3,UGT2B10,CYP3A43,Adh6a,Gsta4,UGT2B15,ADH1C (includes EG:11522),CYP2S1,CYP2J2,CYP2C8,UGT2A3,Gstm3,GSTA3,CYP3A4,Cyp2c40 (includes others)       |
| LPS/IL-1 Mediated Inhibition of RXR Function                                   | 5.25E-08 | PPARA,GSTM5,FABP6,MAOB,CYP2B6,ALDH1A3,HMGCS2,ABCG8,ABCB1,SLC27A4,IL1RL1,ALDH3A2,Gstm3,FMO5,LBP,HS3ST1,CHST4,CYP2C8,GSTA3,LY96 (includes EG:17087),CYP3A4,ACSL1,ABCC2,ACSL3,PAPSS2,HMGCS1,Sult1d1         |
| Tryptophan Metabolism                                                          | 1.70E-07 | ADH4 (includes EG:127),CYP51A1,SIAH1,CYP2C18,MAOB,CYP2B6,DHCR24,ALDH1A3,CYP3A43,CYP2S1,DDC,CYP2J2,CYP2C8,CCBL1,ALDH3A2,WARS,BCKDHB,CYP3A4,ABP1 (includes EG:26),Cyp2c40 (includes others)                |
| Interferon Signaling                                                           | 1.17E-06 | IRF1 (includes EG:16362),IRF9,STAT1,MX1,OAS1,TAP1,STAT2,PSMB8,IFIT3,IFIT1                                                                                                                                |
| Xenobiotic Metabolism Signaling                                                | 3.89E-06 | GSTM5,MAOB,CYP2B6,ALDH1A3,GCLC,UGT2B10,UGT2B15,ABCB1,Ces1g,NOS2,LIPA,ALDH3A2,Gstm3,MAP3K13,PIK3R3,FMO5,NQO1,Ces1b/Ces1c,MAP2K6,HS3ST1,CHST4,CYP2C8,Ces2a,FTL,Ces2b/Ces2c,GSTA3,CYP3A4,CES1,ABCC2,Sult1d1 |
| Fatty Acid Metabolism                                                          | 5.25E-06 | ADH4 (includes EG:127),CYP51A1,CYP2C18,CYP2B6,ALDH1A3,CYP3A43,Adh6a,ADH1C (includes EG:11522),CYP2S1,SLC27A4,CYP2J2,CYP2C8,ALDH3A2,CYP3A4,ACSL1,ACSL3,Cyp2c40 (includes others)                          |
| Fructose and Mannose Metabolism                                                | 2.75E-05 | ADH4 (includes EG:127),NUDT5,PFKFB3,DUSP16,GMDS,ALDOC,SORD,HK2,GMPPB,PGM2                                                                                                                                |
| PXR/RXR Activation                                                             | 3.31E-05 | PPARA,G6PC,ALDH3A2,CYP2B6,HMGCS2,CYP3A4,ABCB1,ABCC2,PAPSS2,FOXO3,SCD,CYP2C8                                                                                                                              |
| Linoleic Acid Metabolism                                                       | 4.47E-05 | CYP51A1,CYP2C18,CYP2B6,FADS3,CYP3A4,CYP3A43,PLA2G2F,CYP2S1,PLA2G5,Cyp2c40 (includes others),CYP2J2,CYP2C8                                                                                                |
| Activation of IRF by Cytosolic Pattern Recognition Receptors                   | 7.76E-05 | ZBP1,IFIH1,IRF9,STAT1,DHX58,TBK1,STAT2,DDX58,ADAR,ISG15,IFIT2                                                                                                                                            |
| LXR/RXR Activation                                                             | 8.91E-05 | CD36,IL1RL1,CCL2,IL33,MSR1 (includes EG:20288),LY96 (includes EG:17087),ABCG8,ARG2 (includes EG:11847),SCD,LBP,NOS2,IL18 (includes EG:16173)                                                             |
| Nitrogen Metabolism                                                            | 1.02E-04 | CA13,CA3,CA8,ADAR,TGM2,ASNS,GLS,CA2                                                                                                                                                                      |
| Aminoacyl-tRNA Biosynthesis                                                    | 1.02E-04 | YARS,TARS,WARS,IARS,LARS,CARS,AARS,MARS                                                                                                                                                                  |
| Arachidonic Acid Metabolism                                                    | 1.15E-04 | GPX2,CYP51A1,CYP2C18,CYP2B6,CYP3A43,PLA2G2F,CYP2S1,PLA2G5,CYP2J2,CYP2C8,GGT1,CBR1,Cyp4f16/Gm9705,CYP3A4,Cyp2c40 (includes others)                                                                        |
| p38 MAPK Signaling                                                             | 1.32E-04 | ATF4,MAP2K6,PLA2G2F,TIFA,PLA2G5,MEF2C,IL18 (includes EG:16173),IL1RL1,HIST3H3,MYC,IL33,DAXX,STAT1,EEF2K                                                                                                  |
| Biosynthesis of Steroids                                                       | 1.55E-04 | FDPS,FDFT1,IDI1,DHCR7,LSS,NQO1                                                                                                                                                                           |
| Arginine and Proline Metabolism                                                | 1.82E-04 | SRM,ALDH3A2,MAOB,ALDH1A3,BCKDHB,Amd1 (includes others),ARG2 (includes EG:11847),ABP1 (includes EG:26),PRODH,NOS2,OAT                                                                                     |
| Glycolysis/Gluconeogenesis                                                     | 2.40E-04 | ADH4 (includes EG:127),G6PC,ALDH3A2,ALDH1A3,ALDOC,Adh6a,ADH1C (includes EG:11522),ACSL1,ACSS2,ACSL3,HK2,PGM2                                                                                             |
| Pyruvate Metabolism                                                            | 4.68E-04 | ADH4 (includes EG:127),ME1,ALDH3A2,ACOT12,ALDH1A3,BCKDHB,PKC1 (includes EG:18534),ACSL1,ACSS2,ACSL3                                                                                                      |
| Glutathione Metabolism                                                         | 6.46E-04 | GPX2,GSTM5,Gstm3,GSR,GCLC,GSTA3,Gsta4,GCLM,GGT1                                                                                                                                                          |
| Sphingolipid Metabolism                                                        | 6.76E-04 | ASAH2,DUSP16,SPTLC2,SPTSSA,KDSR,ASAH1,UGCG,SGPP1,LPIN2,LCT,PPAP2A                                                                                                                                        |
| Glycerolipid Metabolism                                                        | 7.76E-04 | ADH4 (includes EG:127),LIPA,ALDH3A2,ALDH1A3,CLPS,Adh6a,ADH1C (includes EG:11522),DGKB,LPIN2,LCT,PNLIPRP2,PPAP2A                                                                                          |
| Hepatic Fibrosis / Hepatic Stellate Cell Activation                            | 8.71E-04 | VEGFA,HGF,ICAM1,SMAD4,MMP13,CXCL9,FIGF,IL1RL1,CCL2,STAT1,LY96 (includes EG:17087),PDGFC,EDN1,IL4R,LBP                                                                                                    |
| Bile Acid Biosynthesis                                                         | 1.51E-03 | ADH4 (includes EG:127),LIPA,ALDH3A2,ALDH1A3,CYP3A4,Adh6a,ADH1C (includes EG:11522),SRD5A1                                                                                                                |
| Role of Pattern Recognition Receptors in Recognition of Bacteria and Viruses   | 1.62E-03 | IFIH1,TLR2,EIF2AK2,OAS1,OAS2,RIPK2,DDX58,PIK3R3,OAS3,RNASEL                                                                                                                                              |
| Starch and Sucrose Metabolism                                                  | 1.95E-03 | UGT2A3,NUDT5,G6PC,UGT2B10,UGT2B15,UGDH,ENPP3,HK2,PGM2                                                                                                                                                    |
| Tyrosine Metabolism                                                            | 1.95E-03 | ADH4 (includes EG:127),MAOB,ALDH1A3,BCKDHB,TAT,Adh6a,ADH1C (includes EG:11522),ABP1 (includes EG:26),DDC                                                                                                 |
| Atherosclerosis Signaling                                                      | 2.14E-03 | CCL11,CD36,CCL2,IL33,ICAM1,MSR1 (includes EG:20288),PDGFC,MMP13,PLA2G2F,PLA2G5,IL18 (includes EG:16173)                                                                                                  |
| Pancreatic Adenocarcinoma Signaling                                            | 2.19E-03 | HBEGF,SUV39H1,VEGFA,E2F3,STAT1,SMAD4,PDGFC,CCND1,STAT3,CDKN1B,PIK3R3,FIGF                                                                                                                                |
| IL-10 Signaling                                                                | 2.63E-03 | IL1RL1,IL33,SOCS3,ARG2 (includes EG:11847),MAP2K6,STAT3,IL4R,LBP,IL18 (includes EG:16173)                                                                                                                |
| IL-22 Signaling                                                                | 3.31E-03 | SOCS3,STAT1,IL22RA2,STAT3,IL22RA1                                                                                                                                                                        |
| Acute Phase Response Signaling                                                 | 3.39E-03 | SERPING1,MAP2K6,SERPINA3,STAT3,RBP2,IL18 (includes EG:16173),OSMR,IL33,SOCS3,FTL,CP,NOLC1,SA2,PIK3R3,LBP                                                                                                 |
| Phenylalanine Metabolism                                                       | 3.72E-03 | MAOB,DHCR24,ALDH1A3,TAT,ABP1 (includes EG:26),DDC                                                                                                                                                        |
| NRF2-mediated Oxidative Stress Response                                        | 3.72E-03 | GSTM5,GPX2,GCLC,ATF4,MAP2K6,FKBP5,CBR1,FTL,GSR,Gstm3,STIP1,GSTA3,ABCC2,GCLM,PIK3R3,NQO1                                                                                                                  |
| FXR/RXR Activation                                                             | 3.80E-03 | PPARA,SLC10A2,FABP6,G6PC,MLXIPL,IL33,ABCG8,ABCC2,VLDLR,IL18 (includes EG:16173)                                                                                                                          |
| Keratan Sulfate Biosynthesis                                                   | 5.01E-03 | B4GALT6,B4GALT5,B4GALT1,HS3ST1,CHST4,ST3GAL1,Sult1d1                                                                                                                                                     |
| Pentose and Glucuronate Interconversions                                       | 5.62E-03 | ADH4 (includes EG:127),UGT2A3,BCKDHB,UGT2B10,UGT2B15,UGDH                                                                                                                                                |
| Methionine Metabolism                                                          | 5.62E-03 | SRM,TAT,Amd1 (includes others),TGM2,MARS                                                                                                                                                                 |
| Fatty Acid Biosynthesis                                                        | 5.62E-03 | ACSL3,OXSM,BTD                                                                                                                                                                                           |
| Nicotinate and Nicotinamide Metabolism                                         | 8.32E-03 | BST1 (includes EG:12182),G6PC,EIF2AK2,DUSP16,NT5E,MAP2K6,ENPP3,NAMPT,CD38,SGK1                                                                                                                           |
| Retinol Metabolism                                                             | 9.12E-03 | ADH4 (includes EG:127),UGT2A3,UGT2B10,ADH1C (includes EG:11522),UGT2B15,Rdh7                                                                                                                             |
| Cell Cycle: G1/S Checkpoint Regulation                                         | 1.05E-02 | NRG1 (includes EG:112400),SUV39H1,MYC,E2F3,SMAD4,CCND1,CDKN1B                                                                                                                                            |
| Role of Macrophages, Fibroblasts and Endothelial Cells in Rheumatoid Arthritis | 1.05E-02 | TLR2,IL7,PLCE1,VEGFA,ATF4,ICAM1,MAP2K6,MMP13,CCND1,IL18R1,STAT3,FIGF,NOS2,IL18 (includes EG:16173),CCL2,IL1RL1,MYC,IL33,SOCS3,PDGFC,PIK3R3,CEBPD                                                         |
| Galactose Metabolism                                                           | 1.15E-02 | ADH4 (includes EG:127),G6PC,B4GALT1,LCT,HK2,PGM2                                                                                                                                                         |
| Bladder Cancer Signaling                                                       | 1.35E-02 | SUV39H1,VEGFA,MYC,PDGFC,CCND1,MMP13,MMP7,FIGF,FGF7                                                                                                                                                       |
| Pyrimidine Metabolism                                                          | 1.41E-02 | NUDT5,UPP1,POLR1B,ENTPD5,NT5E,POLR3E,ENTPD4,DPYSL2,PNPT1,ENPP3,CTPS,UCK2                                                                                                                                 |
| IL-9 Signaling                                                                 | 1.51E-02 | SOCS3,STAT1,BCL3,STAT3,PIK3R3                                                                                                                                                                            |
| Hepatic Cholestasis                                                            | 1.74E-02 | PPARA,SLC10A2,IL1RL1,FABP6,IL33,LY96 (includes EG:17087),ABCG8,ABCB1,ABCC2,PPRC1,LBP,IL18 (includes EG:16173)                                                                                            |
| ERK5 Signaling                                                                 | 1.78E-02 | MYC,SFN,ATF4,GAB1,MEF2C,FOXO3,SGK1                                                                                                                                                                       |
| Role of JAK1 and JAK3 in yc Cytokine Signaling                                 | 1.78E-02 | IL7,SOCS3,STAT1,STAT3,IL4R,PIK3R3,IL15RA                                                                                                                                                                 |
| Toll-like Receptor Signaling                                                   | 1.91E-02 | PPARA,TLR2,EIF2AK2,LY96 (includes EG:17087),MAP2K6,LBP                                                                                                                                                   |
| Glutamate Metabolism                                                           | 1.91E-02 | CCBL1,GSR,GCLC,GCLM,GLS                                                                                                                                                                                  |
| Phospholipid Degradation                                                       | 2.00E-02 | TMEM86B,PLCE1,GDE1 (includes EG:393213),PLA2G2F,DGKB,PLA2G5,LPIN2,PPAP2A                                                                                                                                 |
| Role of JAK family kinases in IL-6-type Cytokine Signaling                     | 2.19E-02 | OSMR,SOCS3,STAT1,STAT3                                                                                                                                                                                   |
| Glycine, Serine and Threonine Metabolism                                       | 2.63E-02 | PLCE1,MAOB,TARS,PSAT1,SHMT2,ABP1 (includes EG:26),PHGDH                                                                                                                                                  |
| Role of PKR in Interferon Induction and Antiviral Response                     | 2.88E-02 | IRF1 (includes EG:16362),EIF2AK2,STAT1,MAP2K6,RNASEL                                                                                                                                                     |
| Antigen Presentation Pathway                                                   | 2.88E-02 | HLA-DMA,CIITA,PSMB9,TAP1,PSMB8                                                                                                                                                                           |
| Neuregulin Signaling                                                           | 2.95E-02 | NRG1 (includes EG:112400),HBEGF,MYC,GRB7,CDKN1B,PIK3R3,EREG,PTEN                                                                                                                                         |
| T Helper Cell Differentiation                                                  | 3.02E-02 | HLA-DMA,STAT1,IL18R1,STAT3,IL4R,BCL6,IL18 (includes EG:16173)                                                                                                                                            |
| HIF1α Signaling                                                                | 3.02E-02 | VEGFA,EGLN3,PDGFC,MMP13,EDN1,PIK3R3,MMP7,FIGF,NOS2                                                                                                                                                       |
| Propanoate Metabolism                                                          | 3.47E-02 | ALDH3A2,DHCR24,ALDH1A3,ACSL1,ACSS2,ACSL3                                                                                                                                                                 |
| Glucocorticoid Receptor Signaling                                              | 3.47E-02 | CCL11,HSPA1A/HSPA1B,ICAM1,SMAD4,CCL13,TAF13 (includes EG:310784),FKBP5,STAT3,NOS2,GTF2B,CCL2,HSPA8,STAT1,TAT,PKC1 (includes EG:18534),PIK3R3,FOXO3,SGK1                                                  |
| Ascorbate and Aldarate Metabolism                                              | 3.55E-02 | ALDH3A2,ALDH1A3,BCKDHB                                                                                                                                                                                   |
| Histidine Metabolism                                                           | 4.47E-02 | ALDH3A2,MAOB,ALDH1A3,ABP1 (includes EG:26),DDC                                                                                                                                                           |
| ILK Signaling                                                                  | 4.57E-02 | ARHGEF6,VEGFA,ATF4,MAP2K6,CCND1,FIGF,NOS2,Actg2,MYC,PDGFC,RHOJ,PIK3R3,PTEN                                                                                                                               |
| Riboflavin Metabolism                                                          | 4.79E-02 | DUSP16,ENPP3,ACP6                                                                                                                                                                                        |
| MSP-RON Signaling Pathway                                                      | 4.90E-02 | CCL2,TLR2,Actg2,PIK3R3,NOS2                                                                                                                                                                              |
| JAK/Stat Signaling                                                             | 4.90E-02 | PTPN1,SOCS3,STAT1,STAT2,STAT3,PIK3R3                                                                                                                                                                     |
