# Supplementary material
Source: PubMed Central journal article supplement (PMC3478606)
Supplement: 1212809109_sfig07.pdf [file 1212809109_sfig07.pdf]

**Figure S7 - Effect of treatment by *Lactobacillus* on *Lm* gene expression**

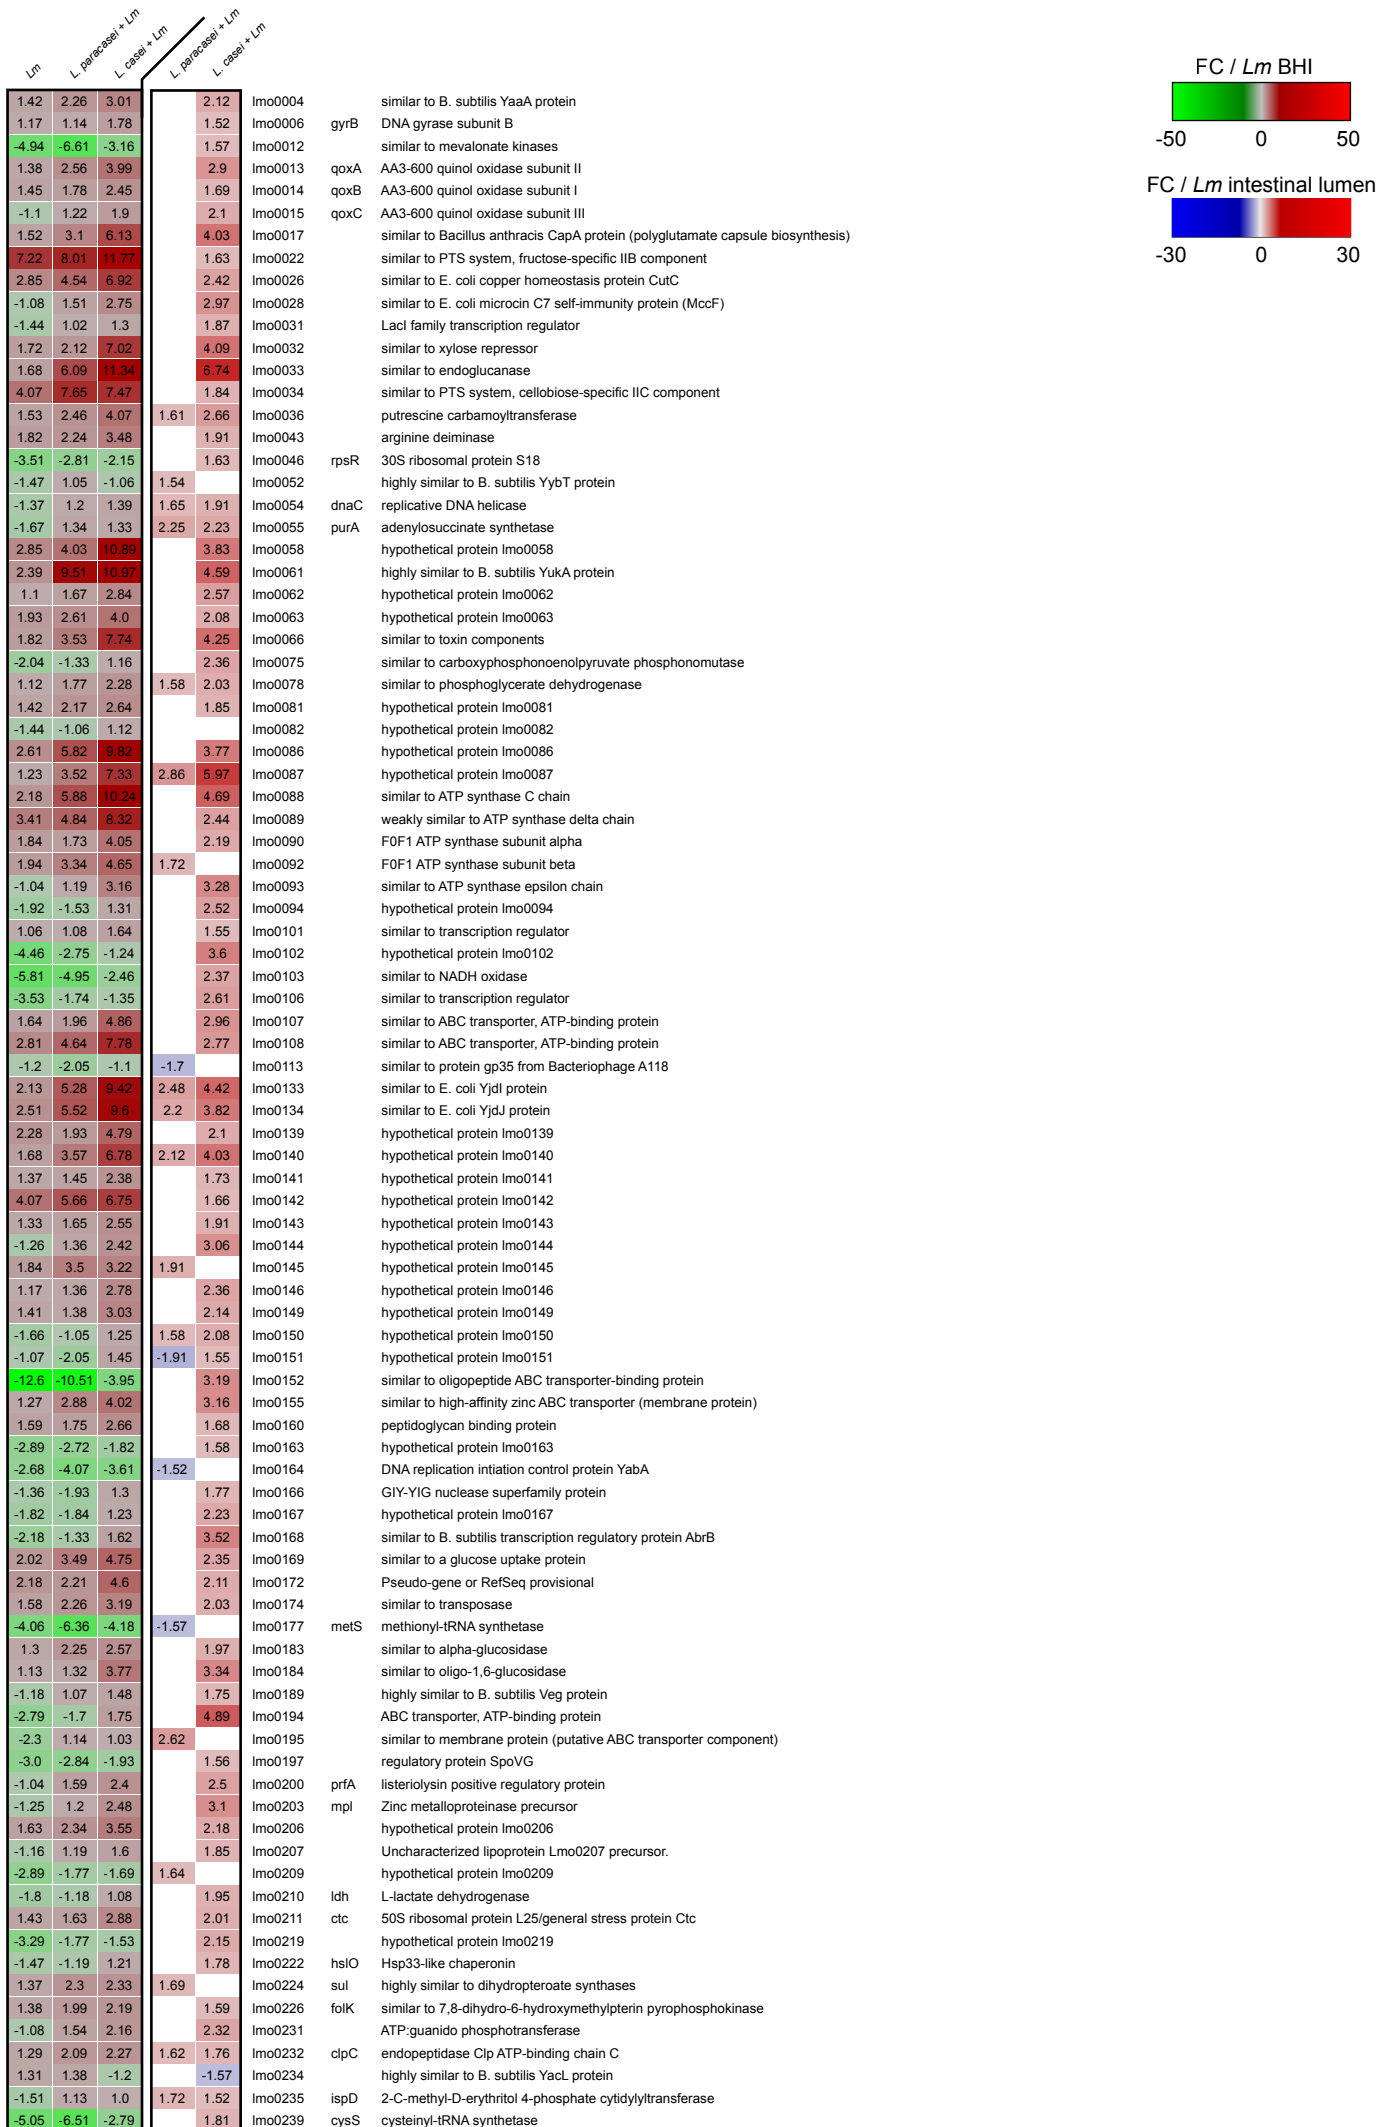

| Ln    | L. paracasei + Ln | L. casei + Ln | L. paracasei + Ln | L. casei + Ln |
|-------|-------------------|---------------|-------------------|---------------|
| -5.28 | -5.87             | -2.9          | 1.82              |               |
| -2.1  | 1.25              | 2.36          | 2.63              | 4.96          |
| -1.08 | 1.29              | 2.37          |                   | 2.56          |
| -1.2  | -1.86             | -1.13         | -1.55             |               |
| 6.18  | 9.3               | 12.88         |                   | 2.08          |
| 2.22  | 3.57              | 8.55          | 1.61              | 3.86          |
| 7.58  | 16.38             | 21.12         |                   | 2.78          |
| -1.02 | 1.21              | 3.13          |                   | 3.2           |
| 2.79  | 5.44              | 4.11          |                   | 1.47          |
| -2.54 | -2.35             | -1.79         |                   | 1.42          |
| 2.31  | 7.43              | 5.88          |                   | 2.54          |
| -1.06 | 1.48              | 2.07          |                   | 2.18          |
| -1.77 | -1.23             | 1.5           |                   | 2.65          |
| -3.86 | -2.04             | -1.05         |                   | 3.67          |
| -2.27 | -2.05             | 1.13          |                   | 2.57          |
| -1.88 | -2.79             | -2.98         | -1.48             |               |
| -2.68 | -3.67             | -1.26         |                   | 2.12          |
| 2.94  | 3.45              | 4.44          |                   | 1.51          |
| 3.09  | 4.5               | 4.5           | 1.45              | 1.45          |
| -1.71 | -2.74             | -1.18         | -1.6              |               |
| -1.25 | 1.26              | 1.6           |                   | 2.0           |
| 1.71  | 3.3               | 4.74          | 1.93              | 2.77          |
| 2.17  | 2.6               | 6.87          |                   | 3.16          |
| 1.42  | 1.24              | 4.49          |                   | 3.16          |
| 1.7   | 1.61              | 5.63          |                   | 3.31          |
| 1.13  | 1.39              | 2.14          |                   | 1.89          |
| -3.96 | -2.62             | -1.95         |                   | 2.03          |
| 1.17  | 1.72              | 3.01          |                   | 2.57          |
| 1.37  | 1.39              | 2.32          |                   | 1.69          |
| 1.12  | 1.59              | 2.57          |                   | 2.3           |
| 1.18  | 1.37              | 2.71          |                   | 2.29          |
| 1.23  | 3.16              | 3.93          |                   | 3.18          |
| 1.66  | 2.92              | 4.13          |                   | 2.49          |
| 1.07  | 1.88              | 2.8           |                   | 2.6           |
| 2.9   | 3.48              | 5.77          |                   | 1.99          |
| -1.12 | 1.58              | 2.09          | 1.76              | 2.33          |
| -2.11 | -1.09             | 1.13          | 1.94              | 2.38          |
| 1.56  | 1.55              | 3.48          |                   | 2.22          |
| 1.69  | 1.99              | 4.72          |                   | 2.79          |
| -1.63 | -1.64             | 1.36          |                   | 2.21          |
| 1.72  | 3.34              | 7.77          |                   | 4.51          |
| 1.04  | 1.6               | 2.47          |                   | 2.39          |
| 1.74  | 3.33              | 4.6           | 1.92              | 2.65          |
| 2.01  | 3.96              | 6.48          | 1.97              | 3.22          |
| 2.52  | 4.96              | 7.78          | 1.97              | 3.09          |
| 2.36  | 4.09              | 8.76          |                   | 3.72          |
| 2.03  | 4.39              | 10.24         | 2.16              | 5.05          |
| 5.97  | 10.66             | 15.28         |                   | 2.56          |
| 3.29  | 8.56              | 11.92         |                   | 3.62          |
| 2.57  | 5.61              | 10.38         | 2.18              | 4.03          |
| -1.63 | 1.16              | 1.27          |                   | 2.07          |
| -3.53 | -3.09             | -1.28         |                   | 2.76          |
| -1.08 | 1.0               | 2.34          |                   | 2.53          |
| -1.01 | 1.69              | 2.46          | 1.71              | 2.5           |
| 1.06  | 1.65              | 2.18          |                   | 2.06          |
| 1.23  | 2.19              | 2.94          |                   | 2.39          |
| 1.57  | 2.33              | 2.83          |                   | 1.8           |
| 3.22  | 4.3               | 6.93          |                   | 2.15          |
| 8.3   | 11.5              | 15.38         |                   | 1.85          |
| -1.71 | -1.03             | -1.07         |                   | 1.6           |
| 1.09  | 1.41              | 2.28          |                   | 2.09          |
| 1.15  | 1.5               | 1.94          |                   | 1.68          |
| 1.29  | 1.54              | 2.1           |                   | 1.63          |
| -1.53 | 1.67              | 1.86          | 2.55              | 2.84          |
| 2.24  | 3.76              | 5.0           |                   | 2.23          |
| 2.25  | 3.56              | 5.02          |                   | 2.23          |
| 2.3   | 4.63              | 4.19          | 2.02              | 1.82          |
| 1.23  | 1.85              | 2.42          |                   | 1.97          |
| 1.45  | 4.05              | 6.7           |                   | 4.62          |
| 1.65  | -1.18             | 1.45          | -1.95             |               |
| 1.06  | 1.58              | 1.56          | 1.49              |               |
| -1.44 | -1.49             | 1.5           |                   | 2.16          |
| 1.17  | -1.39             | -1.23         | -1.62             | -1.44         |
| -1.51 | -1.11             | 1.35          |                   | 2.04          |
| -2.22 | 2.05              | 1.39          | 4.54              | 3.07          |
| -1.28 | 2.18              | 2.75          | 2.79              | 3.51          |
| 4.28  | 6.59              | 9.61          |                   | 2.25          |
| 1.05  | 1.61              | 1.97          | 1.54              | 1.88          |
| 31.51 | 53.6              | 53.42         | 1.7               |               |
| 19.35 | 27.39             | 46.1          |                   | 2.38          |
| 2.57  | 7.91              | 8.88          | 3.08              | 3.46          |
| 1.29  | 1.83              | 3.39          |                   | 2.64          |
| 1.97  | 2.48              | 3.58          |                   | 1.81          |
| 1.01  | 1.07              | 3.4           |                   | 3.37          |
| 1.37  | 3.12              | 3.96          |                   | 2.88          |
| 1.74  | 6.76              | 6.56          |                   | 3.76          |
| 1.43  | 3.11              | 5.28          |                   | 3.69          |
| 1.9   | 3.26              | 3.5           |                   | 1.85          |
| -2.57 | -2.93             | -1.21         |                   | 2.13          |
| -1.44 | 1.41              | 3.45          |                   | 4.97          |
| -1.09 | 1.41              | 3.13          |                   | 3.4           |
| 1.16  | 1.7               | 2.3           | 1.47              |               |

Imo0241 similar to conserved hypothetical proteins like to B. subtilis YacO protein  
 Imo0247 hypothetical protein Imo0247  
 Imo0255 hypothetical protein Imo0255  
 Imo0257 hypothetical protein Imo0257  
 Imo0263 inIH internalin H  
 Imo0264 inIE internalin E  
 Imo0265 succinyl-diaminopimelate desuccinylase  
 Imo0267 similar to other proteins  
 Imo0270 hypothetical protein Imo0270  
 Imo0273 hypothetical protein Imo0273  
 Imo0274 hypothetical protein Imo0274  
 Imo0275 hypothetical protein Imo0275  
 Imo0277 similar to oxidoreductase  
 Imo0281 hypothetical protein Imo0281  
 Imo0286 transaminase  
 Imo0287 similar to two-component response regulator  
 Imo0289 similar to B. subtilis YycH protein  
 Imo0291 conserved hypothetical protein similar to B. subtilis YycJ protein  
 Imo0292 similar to heat-shock protein htrA serine protease  
 Imo0293 rRNA large subunit methyltransferase  
 Imo0295 similar to FMN-containing NADPH-linked nitroflavin reductase  
 Imo0296 hypothetical protein Imo0296  
 Imo0297 similar to transcriptional antiterminator (BglG family)  
 Imo0298 similar to PTS beta-glucoside-specific enzyme IIC component  
 Imo0301 similar to PTS beta-glucoside-specific enzyme IIA component  
 Imo0305 similar to low specificity L-allo-threonine aldolase  
 Imo0306 hypothetical protein Imo0306  
 Imo0308 Pseudo-gene or RefSeq provisional  
 Imo0310 hypothetical protein Imo0310  
 Imo0311 hypothetical protein Imo0311  
 Imo0313 hypothetical protein Imo0313  
 Imo0315 similar to thiamin biosynthesis protein  
 Imo0316 hydroxyethylthiazole kinase  
 Imo0318 thiE thiamine-phosphate pyrophosphorylase  
 Imo0320 similar to surface protein (peptidoglycan bound, LPXTG motif)  
 Imo0321 hypothetical protein Imo0321  
 Imo0322 hypothetical protein Imo0322  
 Imo0326 similar to transcriptional regulators  
 Imo0327 similar to cell surface proteins (LPXTG motif)  
 Imo0332 hypothetical protein Imo0332  
 Imo0333 similar to internalin proteins, putative peptidoglycan bound protein (LPXTG motif)  
 Imo0335 hypothetical protein Imo0335  
 Imo0339 weakly similar to inorganic pyrophosphatase  
 Imo0340 hypothetical protein Imo0340  
 Imo0342 similar to transketolase  
 Imo0343 putative transaldolase  
 Imo0344 short chain dehydrogenase  
 Imo0347 similar to dihydroxyacetone kinase  
 Imo0348 similar to dihydroxyacetone kinase  
 Imo0350 hypothetical protein Imo0350  
 Imo0359 similar to D-fructose-1,6-biphosphate aldolase  
 Imo0362 similar to conserved hypothetical protein  
 Imo0367 conserved hypothetical protein similar to B. subtilis YwbN protein  
 Imo0378 hypothetical protein Imo0378  
 Imo0379 hypothetical protein Imo0379  
 Imo0380 hypothetical protein Imo0380  
 Imo0381 hypothetical protein Imo0381  
 Imo0383 highly similar to B. subtilis methylmalonate-semialdehyde dehydrogenase lolA  
 Imo0386 similar to B. subtilis lolD protein, to acetolactate synthase  
 Imo0389 itrA low temperature requirement protein A  
 Imo0391 hypothetical protein Imo0391  
 Imo0392 highly similar to B. subtilis YqfA protein  
 Imo0393 hypothetical protein Imo0393  
 Imo0398 similar to phosphotransferase system enzyme IIA  
 Imo0401 alpha-mannosidase  
 Imo0405 similar to phosphate transport protein  
 Imo0406 similar to B. subtilis YyaH protein  
 Imo0408 hypothetical protein Imo0408  
 Imo0409 similar to internalin, peptidoglycan bound protein (LPxTG motif)  
 Imo0411 phosphoenolpyruvate synthase  
 Imo0412 hypothetical protein Imo0412  
 Imo0414 hypothetical protein Imo0414  
 Imo0415 similar to endo-1,4-beta-xylanase  
 Imo0416 similar to putative transcription regulator  
 Imo0420 hypothetical protein Imo0420  
 Imo0424 similar to Staphylococcus xylosus glucose uptake protein  
 Imo0428 similar to PTS fructose-specific enzyme IIC component  
 Imo0431 similar to acetyltransferase  
 Imo0433 inIA internalin A  
 Imo0434 inIB internalin B  
 Imo0435 peptidoglycan binding protein  
 Imo0437 hypothetical protein Imo0437  
 Imo0439 weakly similar to a module of peptide synthetase  
 Imo0444 hypothetical protein Imo0444  
 Imo0446 similar to penicillin acylase and to conjugated bile acid hydrolase  
 Imo0447 similar to glutamate decarboxylase  
 Imo0448 similar to amino acid antiporter  
 Imo0450 hypothetical protein Imo0450  
 Imo0454 conserved hypothetical protein similar to B. subtilis YeaC  
 Imo0456 similar to permeases  
 Imo0458 similar to hydantoinase  
 Imo0462 hypothetical protein Imo0462

| Ln     | L. paracasei + Ln | L. casei + Ln | L. paracasei + Ln | L. casei + Ln | Imo     | Protein Name                                                                      |
|--------|-------------------|---------------|-------------------|---------------|---------|-----------------------------------------------------------------------------------|
| 1.02   | 1.53              | 2.8           |                   | 2.73          | Imo0463 | hypothetical protein Imo0463                                                      |
| 1.83   | 4.19              | 6.14          |                   | 2.29          | Imo0466 | hypothetical protein Imo0466                                                      |
| -2.2   | -1.59             | 1.28          |                   | 2.82          | Imo0470 | weakly similar to site-specific DNA-methyltransferase                             |
| 11.93  | 20.74             | 26.74         |                   | 1.74          | Imo0471 | hypothetical protein Imo0471                                                      |
| 2.3    | 2.83              | 4.8           |                   | 2.09          | Imo0473 | Pseudo-gene or RefSeq provisional                                                 |
| 1.27   | -1.32             | 1.12          |                   | -1.68         | Imo0477 | putative secreted protein                                                         |
| 1.05   | -2.38             | -3.44         |                   | -2.5          | Imo0478 | putative secreted protein                                                         |
| -1.89  | -1.87             | -1.15         |                   | 1.64          | Imo0482 | ribosomal RNA large subunit methyltransferase N                                   |
| -17.87 | -5.99             | -3.67         |                   | 4.87          | Imo0485 | hypothetical protein Imo0485                                                      |
| -2.17  | -1.33             | 1.34          | 1.63              | 2.92          | Imo0491 | aroD 3-dehydroquinate dehydratase                                                 |
| -1.72  | -1.2              | 1.8           |                   | 3.1           | Imo0495 | similar to transmembrane protein                                                  |
| 2.57   | 5.17              | 10.5          |                   | 4.08          | Imo0498 | similar to ribose 5-phosphate isomerase                                           |
| 3.73   | 2.93              | 8.7           |                   | 2.33          | Imo0499 | similar to ribulose-5-phosphate 3 epimerase                                       |
| 4.14   | 5.85              | 11.32         |                   | 2.73          | Imo0502 | similar to putative sugar-phosphate isomerase                                     |
| 9.72   | 10.38             | 20.97         |                   | 2.16          | Imo0503 | similar to PTS fructose-specific enzyme IIA component                             |
| 6.03   | 6.16              | 10.47         |                   | 1.74          | Imo0508 | similar to PTS system, Galactitol-specific IIC component                          |
| -2.96  | -1.26             | 1.09          |                   | 2.35          | Imo0513 | weakly similar to transcription regulator                                         |
| 1.11   | 1.63              | 3.38          |                   | 3.04          | Imo0514 | similar to internalin protein, putative peptidoglycan bound protein (LPXTG motif) |
| 4.38   | 7.96              | 24.41         |                   | 1.82          | Imo0515 | hypothetical protein Imo0515                                                      |
| -3.76  | -2.07             | -1.63         |                   | 1.81          | Imo0523 | similar to B. subtilis YybC protein                                               |
| 1.41   | 2.32              | 2.57          |                   | 1.82          | Imo0524 | similar to putative sulfate transporter                                           |
| 1.8    | 3.84              | 7.6           |                   | 4.23          | Imo0526 | similar to transcription regulator (TipA from Streptomyces coelicolor)            |
| -3.44  | -1.82             | -1.73         |                   | 1.99          | Imo0527 | transmembrane protein                                                             |
| -1.66  | -1.55             | 1.61          |                   | 2.67          | Imo0532 | hypothetical protein Imo0532                                                      |
| -2.79  | -2.39             | -1.2          |                   | 2.31          | Imo0534 | hypothetical protein Imo0534                                                      |
| -1.6   | 1.05              | 1.48          | 1.69              | 2.36          | Imo0535 | similar to transcription regulator (LacI family)                                  |
| -1.57  | -1.94             | 1.41          |                   | 2.21          | Imo0538 | similar to N-acyl-L-amino acid amidohydrolase                                     |
| 2.26   | 3.92              | 4.45          |                   | 1.97          | Imo0539 | tagatose 1,6-diphosphate aldolase                                                 |
| -2.78  | -1.55             | 1.01          |                   | 2.82          | Imo0541 | similar to ABC transporter (binding protein)                                      |
| 1.92   | 4.55              | 4.5           |                   | 2.36          | Imo0542 | similar to PTS system, glucitol/sorbitol-specific enzyme IIA component            |
| 1.15   | 1.76              | 5.13          |                   | 4.45          | Imo0551 | hypothetical protein Imo0551                                                      |
| 1.77   | 4.09              | 5.38          |                   | 2.31          | Imo0552 | hypothetical protein Imo0552                                                      |
| -1.53  | -1.15             | 1.33          |                   | 2.03          | Imo0553 | hypothetical protein Imo0553                                                      |
| 1.28   | 2.18              | 1.68          |                   | 1.7           | Imo0555 | similar to di-tripeptide transporter                                              |
| 1.28   | 1.61              | 2.43          |                   | 1.89          | Imo0556 | similar to phosphoglycerate mutase                                                |
| 1.42   | 1.55              | 2.74          |                   | 1.93          | Imo0557 | similar to phosphoglycerate mutase                                                |
| 1.39   | 3.42              | 6.07          |                   | 2.45          | Imo0563 | hisF imidazole glycerol phosphate synthase subunit HisF                           |
| 1.28   | 3.39              | 3.6           |                   | 2.65          | Imo0564 | hisA 1-(5-phosphoribosyl)-5-                                                      |
| 1.75   | 2.73              | 5.04          |                   | 2.88          | Imo0566 | hisB imidazoleglycerol-phosphate dehydratase                                      |
| 1.04   | 1.74              | 4.08          |                   | 3.91          | Imo0567 | hisD histidinol dehydrogenase                                                     |
| -1.59  | -1.22             | 2.9           |                   | 4.62          | Imo0568 | hisG ATP phosphoribosyltransferase catalytic subunit                              |
| 1.37   | 1.94              | 2.21          |                   | 1.61          | Imo0570 | hisJ histidinol-phosphatase                                                       |
| -2.21  | -2.16             | -1.1          |                   | 2.0           | Imo0572 | hypothetical protein Imo0572                                                      |
| 1.18   | 3.76              | 3.24          |                   | 3.19          | Imo0574 | similar to beta-glucosidase                                                       |
| 1.44   | 2.01              | 2.65          |                   | 1.85          | Imo0578 | hypothetical protein Imo0578                                                      |
| 1.25   | 2.59              | 4.42          |                   | 2.06          | Imo0579 | hypothetical protein Imo0579                                                      |
| 1.19   | 2.16              | 2.74          |                   | 2.3           | Imo0580 | weakly similar to carboxylesterase                                                |
| 1.64   | 2.86              | 3.71          |                   | 1.75          | Imo0584 | hypothetical protein Imo0584                                                      |
| 1.86   | 3.08              | 6.85          |                   | 3.67          | Imo0585 | putative secreted protein                                                         |
| 1.39   | 5.39              | 5.29          |                   | 3.87          | Imo0587 | putative secreted protein                                                         |
| 1.18   | 1.25              | 1.67          |                   | 1.42          | Imo0593 | similar to transport proteins (formate%3F)                                        |
| -1.37  | -1.04             | 1.86          |                   | 2.54          | Imo0594 | metX homoserine O-acetyltransferase                                               |
| -4.37  | -2.03             | -2.67         |                   | 2.16          | Imo0597 | similar to transcription regulator CRP/FNR family                                 |
| 1.28   | 1.76              | 2.92          |                   | 2.28          | Imo0602 | weakly similar to transcription regulator                                         |
| -4.47  | -3.33             | -1.54         |                   | 2.9           | Imo0605 | hypothetical protein Imo0605                                                      |
| 1.75   | 1.91              | 2.64          |                   | 1.51          | Imo0606 | similar to transcription regulator MarR family                                    |
| 1.36   | 1.79              | 2.24          |                   | 1.65          | Imo0607 | similar to ABC transporter, ATP-binding protein                                   |
| 1.16   | 1.59              | 2.77          |                   | 2.38          | Imo0608 | similar to ABC transporter, ATP-binding protein                                   |
| -2.92  | -2.15             | -1.82         |                   |               | Imo0609 | similar to E. coli phage shock protein E                                          |
| -2.15  | -3.05             | -1.12         |                   | 1.92          | Imo0613 | similar to oxidoreductase                                                         |
| 1.04   | 1.22              | 2.72          |                   | 2.62          | Imo0617 | hypothetical protein Imo0617                                                      |
| -1.93  | -1.62             | 1.03          |                   | 1.98          | Imo0622 | hypothetical protein Imo0622                                                      |
| 1.69   | 1.8               | 4.47          |                   | 2.64          | Imo0623 | hypothetical protein Imo0623                                                      |
| 1.03   | 1.18              | 1.74          |                   | 1.69          | Imo0624 | hypothetical protein Imo0624                                                      |
| -2.49  | -1.36             | 1.1           |                   | 1.83          | Imo0626 | hypothetical protein Imo0626                                                      |
| 2.75   | 3.17              | 8.74          |                   | 3.17          | Imo0627 | peptidoglycan bound protein                                                       |
| 1.97   | 3.76              | 3.42          |                   | 1.74          | Imo0628 | hypothetical protein Imo0628                                                      |
| 2.23   | 3.28              | 3.68          |                   | 1.47          | Imo0629 | hypothetical protein Imo0629                                                      |
| 1.52   | 2.07              | 2.71          |                   |               | Imo0630 | similar to transcription antiterminator BglG family                               |
| 2.44   | 6.07              | 11.31         |                   | 4.63          | Imo0634 | similar to an E. coli putative tagatose 6-phosphate kinase                        |
| -2.73  | -1.06             | -1.35         |                   | 2.57          | Imo0637 | weakly similar to methyltransferase                                               |
| 1.71   | 1.46              | 2.94          |                   | 1.73          | Imo0638 | hypothetical protein Imo0638                                                      |
| 1.31   | 1.34              | 1.96          |                   | 1.5           | Imo0639 | similar to a transcription regulator (surface protein PAG negative regulator par) |
| -1.78  | -1.16             | 1.14          |                   | 2.04          | Imo0642 | hypothetical protein Imo0642                                                      |
| -4.12  | -4.62             | -2.42         |                   | 1.7           | Imo0646 | hypothetical protein Imo0646                                                      |
| 1.09   | 1.99              | 2.41          |                   | 1.83          | Imo0647 | hypothetical protein Imo0647                                                      |
| 4.27   | 7.89              | 9.52          |                   | 1.85          | Imo0648 | similar to membrane proteins                                                      |
| 4.96   | 9.68              | 10.86         |                   | 2.19          | Imo0649 | similar to transcription regulators                                               |
| -2.11  | -1.03             | 1.78          |                   | 2.06          | Imo0652 | hypothetical protein Imo0652                                                      |
| 1.35   | 1.74              | 2.2           |                   | 1.63          | Imo0655 | similar to phosphoprotein phosphatases                                            |
| -2.08  | -1.81             | -1.44         |                   | 1.45          | Imo0656 | hypothetical protein Imo0656                                                      |
| -1.08  | 1.07              | 2.07          |                   | 2.22          | Imo0657 | hypothetical protein Imo0657                                                      |
| 1.51   | 2.85              | 4.61          |                   | 3.06          | Imo0659 | similar to transcription regulator (Rgg type)                                     |
| 1.11   | 2.15              | 3.24          |                   | 2.91          | Imo0661 | hypothetical protein Imo0661                                                      |
| -1.98  | -1.67             | -1.16         |                   | 1.71          | Imo0662 | thiD highly similar to phosphomethylpyrimidine kinase thiD                        |
| -1.26  | -1.86             | -1.71         |                   | -1.47         | Imo0663 | hypothetical protein Imo0663                                                      |
| -1.59  | -1.47             | 1.13          |                   | 1.81          | Imo0664 | similar to acetyl transferase                                                     |
| 2.42   | 3.45              | 4.31          |                   | 1.78          | Imo0670 | hypothetical protein Imo0670                                                      |
| -2.45  | 1.18              | 1.02          |                   | 2.49          | Imo0672 | hypothetical protein Imo0672                                                      |
| 2.07   | 6.79              | 12.59         |                   | 6.09          | Imo0676 | fljP flagellar biosynthesis protein FljP                                          |
| -1.43  | 2.29              | 3.71          |                   | 5.32          | Imo0677 | fljQ flagellar biosynthesis protein FljQ                                          |
| 3.1    | 6.55              | 8.28          |                   | 2.11          | Imo0678 | fljR flagellar biosynthesis protein FljR                                          |

| Lm     |        |        | L. paracasei + Lm |      |       | L. casei + Lm |      |                                                                                           | L. paracasei + Lm |  |  | L. casei + Lm |  |  |
|--------|--------|--------|-------------------|------|-------|---------------|------|-------------------------------------------------------------------------------------------|-------------------|--|--|---------------|--|--|
| -1.01  | 1.38   | 2.63   |                   |      | 2.65  | Imo0679       | flhB | flagellar biosynthesis protein FlhB                                                       |                   |  |  |               |  |  |
| 1.81   | 4.17   | 7.92   | 2.31              |      |       | Imo0683       |      | similar to chemotactic methyltransferase CheR                                             |                   |  |  |               |  |  |
| 2.19   | 3.72   | 6.39   |                   |      | 2.92  | Imo0685       |      | flagellar motor protein MotA                                                              |                   |  |  |               |  |  |
| 1.93   | 3.28   | 8.25   | 1.7               | 4.28 |       | Imo0688       |      | hypothetical protein Imo0688                                                              |                   |  |  |               |  |  |
| 1.22   | 2.66   | 7.39   |                   |      | 6.05  | Imo0693       |      | flagellar motor switch protein                                                            |                   |  |  |               |  |  |
| 1.95   | 3.5    | 5.85   |                   |      | 3.0   | Imo0696       | figD | flagellar basal body rod modification protein                                             |                   |  |  |               |  |  |
| 1.55   | 4.66   | 8.36   | 3.01              | 5.39 |       | Imo0697       | figE | flagellar hook protein FigE                                                               |                   |  |  |               |  |  |
| 2.61   | 5.68   | 6.4    |                   |      | 2.45  | Imo0698       |      | flagellar motor switch protein                                                            |                   |  |  |               |  |  |
| 1.33   | 1.73   | 3.1    |                   |      | 2.34  | Imo0704       |      | hypothetical protein Imo0704                                                              |                   |  |  |               |  |  |
| 1.69   | 3.39   | 5.52   |                   |      | 3.27  | Imo0705       | figK | flagellar hook-associated protein FigK                                                    |                   |  |  |               |  |  |
| 1.26   | 1.53   | 1.8    |                   |      | 1.43  | Imo0706       | figL | flagellar hook-associated protein FigL                                                    |                   |  |  |               |  |  |
| -1.35  | 1.75   | 2.42   | 2.35              | 3.26 |       | Imo0707       | fliD | flagellar capping protein                                                                 |                   |  |  |               |  |  |
| 2.07   | 1.35   | 4.17   |                   |      | 2.01  | Imo0711       | figC | flagellar basal body rod protein FigC                                                     |                   |  |  |               |  |  |
| 1.18   | 1.88   | 2.16   |                   |      | 1.82  | Imo0714       | fliG | flagellar motor switch protein G                                                          |                   |  |  |               |  |  |
| 2.55   | 6.03   | 12.64  |                   |      | 4.95  | Imo0716       | fliI | flagellum-specific ATP synthase                                                           |                   |  |  |               |  |  |
| 1.84   | 2.65   | 6.83   |                   |      | 3.71  | Imo0717       |      | similar to transglycosylase                                                               |                   |  |  |               |  |  |
| 1.37   | 1.52   | 3.32   |                   |      | 2.43  | Imo0718       |      | hypothetical protein Imo0718                                                              |                   |  |  |               |  |  |
| -1.32  | 1.56   | 2.4    | 2.06              | 3.16 |       | Imo0719       |      | hypothetical protein Imo0719                                                              |                   |  |  |               |  |  |
| -1.61  | 1.19   | 2.03   | 1.92              | 3.26 |       | Imo0720       |      | hypothetical protein Imo0720                                                              |                   |  |  |               |  |  |
| -1.42  | -4.05  | -2.1   | -2.85             |      |       | Imo0727       |      | glucosamine--fructose-6-phosphate aminotransferase                                        |                   |  |  |               |  |  |
| 1.29   | 2.16   | 2.55   |                   |      | 1.97  | Imo0728       |      | similar to riboflavin kinase / FAD synthase                                               |                   |  |  |               |  |  |
| -14.55 | -11.02 | -6.3   |                   |      | 2.31  | Imo0731       |      | hypothetical protein Imo0731                                                              |                   |  |  |               |  |  |
| 1.18   | 2.13   | 2.02   | 1.8               |      |       | Imo0733       |      | similar to transcription regulator                                                        |                   |  |  |               |  |  |
| 2.04   | 5.08   | 8.9    | 2.5               | 4.37 |       | Imo0736       |      | ribose-5-phosphate isomerase B                                                            |                   |  |  |               |  |  |
| 4.18   | 6.79   | 11.62  |                   |      | 2.78  | Imo0737       |      | hypothetical protein Imo0737                                                              |                   |  |  |               |  |  |
| 4.77   | 12.52  | 19.88  | 2.62              | 4.17 |       | Imo0738       |      | similar to phosphotransferase system (PTS) beta-glucoside-specific enzyme IIABC component |                   |  |  |               |  |  |
| 5.13   | 13.04  | 16.69  | 2.54              | 3.25 |       | Imo0739       |      | similar to 6-phospho-beta-glucosidase                                                     |                   |  |  |               |  |  |
| 1.9    | 2.07   | 6.49   |                   |      | 3.42  | Imo0741       |      | similar to transcriptional regulator (GntR family)                                        |                   |  |  |               |  |  |
| 1.84   | 2.93   | 4.85   |                   |      | 2.64  | Imo0742       |      | similar to ABC transporter, ATP-binding protein                                           |                   |  |  |               |  |  |
| 1.51   | 3.06   | 4.3    |                   |      | 2.84  | Imo0743       |      | hypothetical protein Imo0743                                                              |                   |  |  |               |  |  |
| 1.72   | 2.7    | 6.78   |                   |      | 3.94  | Imo0744       |      | similar to ABC transporter, ATP-binding protein                                           |                   |  |  |               |  |  |
| 1.34   | 2.24   | 2.41   |                   |      | 1.8   | Imo0747       |      | hypothetical protein Imo0747                                                              |                   |  |  |               |  |  |
| -1.82  | -1.07  | 1.05   |                   |      | 1.92  | Imo0748       |      | hypothetical protein Imo0748                                                              |                   |  |  |               |  |  |
| -1.42  | -1.57  | 1.4    |                   |      | 2.0   | Imo0749       |      | hypothetical protein Imo0749                                                              |                   |  |  |               |  |  |
| -2.27  | -1.6   | 1.07   | 1.42              | 2.42 |       | Imo0751       |      | hypothetical protein Imo0751                                                              |                   |  |  |               |  |  |
| -2.13  | -1.25  | 1.21   | 1.7               |      |       | Imo0755       |      | hypothetical protein Imo0755                                                              |                   |  |  |               |  |  |
| -2.8   | -1.3   | -1.01  |                   |      | 2.77  | Imo0756       |      | Similar to ABC transporter (ATP-binding protein)                                          |                   |  |  |               |  |  |
| 1.34   | 2.98   | 5.21   | 2.22              | 3.88 |       | Imo0758       |      | hypothetical protein Imo0758                                                              |                   |  |  |               |  |  |
| 1.12   | 3.06   | 3.94   | 2.73              | 3.52 |       | Imo0759       |      | hypothetical protein Imo0759                                                              |                   |  |  |               |  |  |
| 1.12   | 2.24   | 2.72   | 2.0               | 2.43 |       | Imo0760       |      | hypothetical protein Imo0760                                                              |                   |  |  |               |  |  |
| -1.57  | -1.49  | 1.35   |                   |      | 2.13  | Imo0762       |      | similar to ATP/GTP-binding protein                                                        |                   |  |  |               |  |  |
| 1.06   | 1.88   | 2.02   | 1.78              |      |       | Imo0772       |      | similar to transcription regulator                                                        |                   |  |  |               |  |  |
| 1.35   | 2.41   | 3.63   | 1.79              | 2.7  |       | Imo0774       |      | hypothetical protein Imo0774                                                              |                   |  |  |               |  |  |
| 1.43   | 3.52   | 4.71   | 2.47              | 3.3  |       | Imo0775       |      | hypothetical protein Imo0775                                                              |                   |  |  |               |  |  |
| 1.91   | 2.32   | 5.03   |                   |      | 2.64  | Imo0776       |      | similar to transcription regulator (repressor)                                            |                   |  |  |               |  |  |
| -1.14  | 1.44   | 2.19   |                   |      | 2.49  | Imo0780       |      | hypothetical protein Imo0780                                                              |                   |  |  |               |  |  |
| -1.67  | -1.18  | -1.51  | 1.42              |      |       | Imo0786       |      | similar to acyl-carrier protein phosphodiesterase and to NAD(P)H dehydrogenase            |                   |  |  |               |  |  |
| -1.29  | -1.18  | 1.81   |                   |      | 2.32  | Imo0790       |      | similar to transcription regulator (EbsC from Enterococcus faecalis)                      |                   |  |  |               |  |  |
| -1.39  | 1.63   | 1.88   | 2.26              | 2.6  |       | Imo0798       |      | similar to lysine-specific permease                                                       |                   |  |  |               |  |  |
| -5.52  | -4.09  | -1.37  |                   |      | 4.04  | Imo0800       |      | similar to B. subtilis YqkB protein                                                       |                   |  |  |               |  |  |
| 1.33   | 1.95   | 4.4    |                   |      | 3.31  | Imo0801       |      | similar to internalin, putative peptidoglycan bound protein (LPXTG motif)                 |                   |  |  |               |  |  |
| 1.35   | 1.85   | 2.78   |                   |      | 2.07  | Imo0807       |      | similar to spermidine/putrescine ABC transporter, ATP-binding protein                     |                   |  |  |               |  |  |
| -13.45 | -28.25 | -13.36 | -2.1              |      |       | Imo0811       |      | similar to carbonic anhydrase                                                             |                   |  |  |               |  |  |
| -1.51  | -1.03  | 1.05   |                   |      | 1.58  | Imo0816       |      | similar to B. subtilis regulatory protein PaiA                                            |                   |  |  |               |  |  |
| 2.7    | 3.96   | 3.69   | 1.47              |      |       | Imo0818       |      | similar to cation transporting ATPase                                                     |                   |  |  |               |  |  |
| -1.48  | -1.3   | 1.28   |                   |      | 1.89  | Imo0820       |      | some similarity to acetyltransferases                                                     |                   |  |  |               |  |  |
| -1.7   | 1.35   | 1.27   | 2.3               | 2.16 |       | Imo0821       |      | hypothetical protein Imo0821                                                              |                   |  |  |               |  |  |
| -2.31  | -5.7   | -2.52  | -2.47             |      |       | Imo0823       |      | similar to oxidoreductases                                                                |                   |  |  |               |  |  |
| 1.91   | 1.55   | 3.34   |                   |      | 1.75  | Imo0825       |      | similar to 3-hydroxy-3-methylglutaryl-coenzyme a reductase                                |                   |  |  |               |  |  |
| -1.04  | -2.15  | -1.51  | -2.07             |      |       | Imo0826       |      | similar to transport protein                                                              |                   |  |  |               |  |  |
| -1.13  | 1.34   | 2.94   |                   |      | 3.34  | Imo0833       |      | similar to transcriptional regulator                                                      |                   |  |  |               |  |  |
| 1.46   | 2.95   | 4.35   |                   |      | 2.97  | Imo0835       |      | peptidoglycan binding protein                                                             |                   |  |  |               |  |  |
| -6.97  | -4.03  | -1.47  |                   |      | 4.76  | Imo0837       |      | Pseudo-gene or RefSeq provisional                                                         |                   |  |  |               |  |  |
| -1.01  | 2.17   | 3.61   | 2.19              | 3.64 |       | Imo0839       |      | similar to Tetracycline resistance protein                                                |                   |  |  |               |  |  |
| 1.84   | 2.79   | 3.92   |                   |      | 2.13  | Imo0842       |      | peptidoglycan binding protein                                                             |                   |  |  |               |  |  |
| 2.3    | 2.76   | 5.29   |                   |      | 2.3   | Imo0849       |      | amidase                                                                                   |                   |  |  |               |  |  |
| 4.37   | 1.83   | 2.03   |                   |      | -2.15 | Imo0850       |      | hypothetical protein Imo0850                                                              |                   |  |  |               |  |  |
| -4.71  | -2.98  | -2.41  | 1.58              |      |       | Imo0854       |      | similar to E. coli SugE protein (transmembrane chaperone)                                 |                   |  |  |               |  |  |
| 5.75   | 7.81   | 15.98  |                   |      | 2.78  | Imo0860       |      | similar to sugar ABC transporter, permease protein                                        |                   |  |  |               |  |  |
| -4.45  | -3.71  | -2.94  |                   |      | 1.51  | Imo0866       |      | similar to ATP-dependent RNA helicase                                                     |                   |  |  |               |  |  |
| 1.41   | 1.7    | 4.77   |                   |      | 3.39  | Imo0869       |      | hypothetical protein Imo0869                                                              |                   |  |  |               |  |  |
| -1.14  | 1.44   | 3.28   | 1.64              | 3.76 |       | Imo0870       |      | hypothetical protein Imo0870                                                              |                   |  |  |               |  |  |
| 1.52   | -1.11  | -1.38  | -1.69             | -2.1 |       | Imo0871       |      | similar to B. subtilis YtcD protein                                                       |                   |  |  |               |  |  |
| 1.14   | 1.8    | 3.14   |                   |      | 2.75  | Imo0872       |      | similar to antibiotic resistance protein                                                  |                   |  |  |               |  |  |
| 1.13   | 1.89   | 3.17   |                   |      | 2.8   | Imo0873       |      | Similar to transcriptional regulator (antiterminator)                                     |                   |  |  |               |  |  |
| 2.05   | 4.72   | 5.78   | 2.3               |      |       | Imo0877       |      | similar to B. subtilis NagB protein (glucosamine-6-phosphate isomerase)                   |                   |  |  |               |  |  |
| 2.82   | 2.83   | 5.6    |                   |      | 1.98  | Imo0878       |      | similar to oxidoreductases                                                                |                   |  |  |               |  |  |
| 3.97   | 4.06   | 9.44   |                   |      | 2.38  | Imo0879       |      | hypothetical protein Imo0879                                                              |                   |  |  |               |  |  |
| -1.45  | 1.03   | 1.5    |                   |      | 2.17  | Imo0880       |      | similar to wall associated protein precursor (LPXTG motif)                                |                   |  |  |               |  |  |
| 2.04   | 2.5    | 3.86   |                   |      | 1.89  | Imo0881       |      | hypothetical protein Imo0881                                                              |                   |  |  |               |  |  |
| -2.63  | -3.42  | -1.46  |                   |      | 1.8   | Imo0886       | dal  | similar to alanine racemase                                                               |                   |  |  |               |  |  |
| -4.32  | -5.46  | -2.82  |                   |      | 1.53  | Imo0896       | rsbX | indirect negative regulation of sigma B dependant gene expression (serine phosphatase)    |                   |  |  |               |  |  |
| 1.57   | 2.43   | 3.32   |                   |      | 2.11  | Imo0897       |      | similar to transport proteins                                                             |                   |  |  |               |  |  |
| 1.09   | 2.36   | 4.63   |                   |      | 4.26  | Imo0901       |      | similar to PTS system, cellobiose-specific IIC component                                  |                   |  |  |               |  |  |
| -1.09  | 1.33   | 1.88   | 1.45              | 2.06 |       | Imo0902       |      | similar to transcription regulator (GntR family)                                          |                   |  |  |               |  |  |
| -16.71 | -9.58  | -4.41  |                   |      | 3.79  | Imo0903       |      | hypothetical protein Imo0903                                                              |                   |  |  |               |  |  |
| -1.13  | 1.19   | 1.58   |                   |      |       | Imo0906       |      | glutathione reductase                                                                     |                   |  |  |               |  |  |
| -3.37  | -2.49  | -1.38  |                   |      | 2.44  | Imo0908       |      | similar to membrane proteins                                                              |                   |  |  |               |  |  |
| -1.22  | 1.11   | 1.87   |                   |      | 2.28  | Imo0910       |      | hypothetical protein Imo0910                                                              |                   |  |  |               |  |  |
| 2.13   | 2.69   | 5.96   |                   |      | 2.8   | Imo0911       |      | hypothetical protein Imo0911                                                              |                   |  |  |               |  |  |
| -1.13  | 1.61   | 1.73   | 1.82              |      |       | Imo0912       |      | similar to transporters (formate)                                                         |                   |  |  |               |  |  |
| 2.64   | 3.63   | 4.7    |                   |      | 1.78  | Imo0913       |      | similar to succinate semialdehyde dehydrogenase                                           |                   |  |  |               |  |  |



|  | Lm     | L. paracasei + Lm | L. casei + Lm | L. paracasei + Lm | L. casei + Lm |         |         |                                                                                                                   |                                   |
|--|--------|-------------------|---------------|-------------------|---------------|---------|---------|-------------------------------------------------------------------------------------------------------------------|-----------------------------------|
|  | 1.68   | 16.19             | 3.97          | 9.63              | 2.36          | lmo1152 |         | similar to Salmonella typhimurium PduB protein                                                                    |                                   |
|  | 1.44   | 19.38             | 5.3           | 13.46             | 3.68          | lmo1153 |         | highly similar to propanediol dehydratase, alpha subunit                                                          |                                   |
|  | 1.13   | 27.18             | 6.8           | 24.09             | 6.03          | lmo1154 |         | similar to diol dehydratase (diol dehydratase) gamma subunit                                                      |                                   |
|  | 2.57   | 12.69             | 6.96          | 4.93              | 2.71          | lmo1155 |         | similar to diol dehydratase (diol dehydratase) gamma subunit (pddC)                                               |                                   |
|  | 2.3    | 9.18              | 10.71         |                   | 4.66          | lmo1156 |         | similar to diol dehydratase-reactivating factor large subunit                                                     |                                   |
|  | 1.19   | 5.43              | 4.2           | 4.58              | 3.55          | lmo1157 |         | similar to diol dehydratase-reactivating factor small chain                                                       |                                   |
|  | 3.7    | 8.88              | 11.47         | 2.4               | 3.1           | lmo1158 |         | similar to Salmonella enterica PduK protein                                                                       |                                   |
|  | 1.4    | 11.16             | 10.07         | 7.96              | 7.19          | lmo1159 |         | similar to carboxysome structural protein                                                                         |                                   |
|  | 1.73   | 5.68              | 4.63          | 3.28              | 2.67          | lmo1160 |         | similar to Salmonella enterica PduL protein                                                                       |                                   |
|  | 2.06   | 11.8              | 7.0           | 5.74              | 3.4           | lmo1161 |         | similar to ethanolamine utilization protein EutJ                                                                  |                                   |
|  | 2.75   | 6.22              | 7.84          |                   | 2.85          | lmo1162 |         | hypothetical protein lmo1162                                                                                      |                                   |
|  | 1.72   | 4.61              | 4.24          | 2.69              | 2.47          | lmo1163 |         | similar to carbon dioxide concentrating mechanism protein                                                         |                                   |
|  | 1.61   | 3.88              | 4.76          |                   | 2.96          | lmo1165 |         | similar to ethanolamine utilization protein EutE                                                                  |                                   |
|  | 1.25   | 9.85              | 7.23          |                   | 5.8           | lmo1167 | glpF    | similar to glycerol uptake facilitator protein                                                                    |                                   |
|  | -2.13  | -1.12             | 1.12          |                   | 2.39          | lmo1169 | cobD    | threonine-phosphate decarboxylase                                                                                 |                                   |
|  | 6.8    | 13.09             | 25.59         |                   | 3.76          | lmo1174 | eutA    | reactivating factor for ethanolamine ammonia lyase                                                                |                                   |
|  | 6.6    | 11.76             | 17.37         |                   | 2.63          | lmo1175 | eutB    | similar to ethanolamine ammonia-lyase, heavy chain                                                                |                                   |
|  | 2.66   | 12.57             | 12.11         |                   | 4.54          | lmo1178 |         | similar to putative carboxysome structural protein                                                                |                                   |
|  | 9.88   | 25.73             | 10.04         | 2.61              |               | lmo1180 |         | similar to putative carboxysome structural protein                                                                |                                   |
|  | 4.18   | 9.5               | 11.77         | 2.28              | 2.82          | lmo1183 |         | hypothetical protein lmo1183                                                                                      |                                   |
|  | 3.37   | 9.62              | 9.67          | 2.92              | 2.87          | lmo1186 |         | similar to ethanolamine utilization protein EutH - Escherichia coli                                               |                                   |
|  | 5.44   | 11.86             | 5.77          | 2.18              |               | lmo1187 |         | similar to ethanolamine utilization protein EutQ                                                                  |                                   |
|  | 1.53   | 2.68              | 4.82          |                   | 3.16          | lmo1189 |         | similar to transcriptional regulator                                                                              |                                   |
|  | 20.96  | 97.22             | 62.35         | 4.64              | 2.97          | lmo1190 |         | hypothetical protein lmo1190                                                                                      |                                   |
|  | 1.84   | 4.45              | 2.92          | 2.42              |               | lmo1191 | cbiA    | cobyrinic acid a,c-diamide synthase                                                                               |                                   |
|  | 2.52   | 9.05              | 5.89          | 3.59              |               | lmo1192 | cobD    | cobalamin biosynthesis protein                                                                                    |                                   |
|  | 2.55   | 5.68              | 11.73         |                   | 4.6           | lmo1193 | cbiC    | cobalt-precorrin-8X methylmutase                                                                                  |                                   |
|  | 2.22   | 4.24              | 4.22          | 1.91              | 1.9           | lmo1194 | cbiD    | cobalt-precorrin-6A synthase                                                                                      |                                   |
|  | 2.53   | 7.92              | 4.7           | 3.13              |               | lmo1196 |         | cobalt-precorrin-6Y C(15)-methyltransferase                                                                       |                                   |
|  | 1.74   | 8.54              | 2.94          | 4.92              | 1.69          | lmo1198 | cbiG    | cobalamin biosynthesis protein CbiG                                                                               |                                   |
|  | 1.66   | 4.73              | 5.31          | 2.84              | 3.19          | lmo1200 |         | similar to cobalamin biosynthesis J protein CbiJ                                                                  |                                   |
|  | 2.54   | 5.68              | 6.68          | 2.24              | 2.63          | lmo1203 | cbiL    | cobalt-precorrin-2 C(20)-methyltransferase                                                                        |                                   |
|  | -1.04  | 2.09              | 2.62          |                   | 2.73          | lmo1208 | cbiP    | cobyrinic acid synthase                                                                                           |                                   |
|  | -1.55  | 1.0               | 1.65          |                   | 2.56          | lmo1209 |         | hypothetical protein lmo1209                                                                                      |                                   |
|  | -5.8   | -4.9              | -3.5          |                   | 1.66          | lmo1211 |         | hypothetical protein lmo1211                                                                                      |                                   |
|  | 1.37   | -1.2              | 1.27          | -1.65             |               | lmo1215 |         | similar to N-acetylmuramoyl-L-alanine amidase (autolysin)                                                         |                                   |
|  | -4.49  | -5.07             | -1.59         |                   | 2.81          | lmo1216 |         | similar to N-acetylmuramoyl-L-alanine amidase (autolysin)                                                         |                                   |
|  | -1.29  | -1.2              | 1.57          |                   | 2.02          | lmo1219 |         | hypothetical protein lmo1219                                                                                      |                                   |
|  | -1.27  | -1.58             | 2.15          |                   | 2.73          | lmo1220 |         | hypothetical protein lmo1220                                                                                      |                                   |
|  | -2.78  | -2.14             | -1.11         |                   | 2.5           | lmo1221 | pheS    | phenylalanyl-tRNA synthetase subunit alpha                                                                        |                                   |
|  | -1.12  | 1.32              | 2.04          |                   | 2.28          | lmo1231 |         | similar to DNA polymerase beta, to B. subtilis YshC protein                                                       |                                   |
|  | -6.66  | -3.39             | -2.68         |                   | 2.48          | lmo1233 | trxA    | thioredoxin                                                                                                       |                                   |
|  | -1.54  | -1.31             | 1.24          |                   | 1.91          | lmo1236 |         | similar to B. subtilis YslB protein                                                                               |                                   |
|  | 4.12   | 8.0               | 6.41          | 1.94              |               | lmo1241 |         | hypothetical protein lmo1241                                                                                      |                                   |
|  | 1.04   | 1.53              | 2.65          |                   | 2.56          | lmo1242 |         | similar to B. subtilis YdeI protein                                                                               |                                   |
|  | 1.05   | 1.86              | 2.05          |                   | 1.94          | lmo1244 |         | weakly similar to phosphoglycerate mutase 1                                                                       |                                   |
|  | -1.21  | 2.2               | 3.23          | 2.66              | 3.91          | lmo1249 |         | hypothetical protein lmo1249                                                                                      |                                   |
|  | -1.26  | 2.65              | 2.98          | 3.33              | 3.74          | lmo1251 |         | similar to regulator of the Fnr CRP family (including PrfA)                                                       |                                   |
|  | -5.03  | -2.14             | -2.44         | 2.35              |               | lmo1252 |         | similar to B. subtilis YxkD protein                                                                               |                                   |
|  | 3.61   | 5.32              | 7.75          |                   | 2.15          | lmo1253 |         | similar to transcription regulator GntR family                                                                    |                                   |
|  | -13.54 | -14.01            | -5.23         |                   | 2.59          | lmo1255 |         | similar to PTS system trehalose specific enzyme IIBC                                                              |                                   |
|  | 1.61   | 3.44              | 6.62          | 2.13              | 4.1           | lmo1256 |         | hypothetical protein lmo1256                                                                                      |                                   |
|  | -1.61  | -1.18             | 1.24          |                   | 1.99          | lmo1257 |         | hypothetical protein lmo1257                                                                                      |                                   |
|  | -3.25  | -3.86             | -1.74         |                   | 1.87          | lmo1260 | proB    | gamma-glutamyl kinase                                                                                             |                                   |
|  | 2.62   | 3.24              | 4.17          |                   | 1.59          | lmo1261 |         | hypothetical protein lmo1261                                                                                      |                                   |
|  | 1.3    | 1.66              | 6.38          |                   | 4.9           | lmo1263 |         | similar to transcriptional regulator                                                                              |                                   |
|  | 1.69   | 1.65              | 4.34          |                   | 2.56          | lmo1264 |         | hypothetical protein lmo1264                                                                                      |                                   |
|  | 1.9    | 2.62              | 5.62          |                   | 2.95          | lmo1265 |         | weakly similar to oligopeptide ABC transporter AppA (binding protein)                                             |                                   |
|  | 1.74   | -1.03             | 1.15          | -1.78             |               | lmo1271 |         | similar to signal peptidase I                                                                                     |                                   |
|  | 1.12   | -1.43             | -1.35         | -1.6              |               | lmo1276 | gid     | tRNA (uracil-5-)-methyltransferase Gid                                                                            |                                   |
|  | 1.74   | 2.09              | 3.4           |                   | 1.95          | lmo1281 |         | similar to B. subtilis YneP protein                                                                               |                                   |
|  | 1.05   | 1.41              | 2.13          |                   | 2.04          | lmo1282 |         | similar to B. subtilis YneQ protein                                                                               |                                   |
|  | 1.25   | 1.94              | 2.66          |                   | 2.13          | lmo1284 |         | conserved hypothetical protein, similar to B. subtilis YneS protein                                               |                                   |
|  | 1.57   | 3.45              | 4.94          |                   | 3.15          | lmo1289 |         | similar to internalin proteins, putative peptidoglycan bound protein (LPXTG motif)                                |                                   |
|  | 1.57   | 1.25              | -1.04         |                   | -1.64         | lmo1291 |         | similar to acyltransferase (to B. subtilis YrhL protein)                                                          |                                   |
|  | 7.74   | 9.4               | 15.03         |                   | 1.94          | lmo1293 | glpD    | similar to glycerol 3 phosphate dehydrogenase                                                                     |                                   |
|  | -1.0   | -1.17             | 2.12          |                   | 2.13          | lmo1295 |         | similar to host factor-1 protein                                                                                  |                                   |
|  | -4.94  | -2.35             | -1.85         | 2.11              | 2.66          | lmo1296 |         | conserved hypothetical protein similar to B. subtilis YrnA protein                                                |                                   |
|  | 1.43   | 2.57              | 3.54          |                   | 1.79          | lmo1301 |         | hypothetical protein lmo1301                                                                                      |                                   |
|  | 1.76   | 3.06              | 3.91          |                   | 1.74          | 2.23    | lmo1302 |                                                                                                                   | LexA repressor                    |
|  | -1.67  | -1.33             | -2.59         |                   | -1.55         | lmo1318 |         | Putative zinc metalloprotease lmo1318                                                                             |                                   |
|  | -2.33  | -4.65             | -2.63         | -2.0              |               | lmo1319 | proS    | prolyl-tRNA synthetase                                                                                            |                                   |
|  | -2.12  | -1.5              | -1.3          | 1.42              |               | lmo1322 | nusA    | transcription elongation factor NusA                                                                              |                                   |
|  | 2.8    | 4.09              | 5.44          |                   | 1.94          | lmo1340 |         | similar to B. subtilis YqgU protein                                                                               |                                   |
|  | 1.14   | 1.55              | 2.7           |                   | 2.37          | lmo1344 |         | similar to comG operon protein 4 (comGD)                                                                          |                                   |
|  | 1.22   | 1.56              | 2.97          |                   | 2.43          | lmo1346 | comGB   | similar to B. subtilis comG operon protein 2                                                                      |                                   |
|  | 14.2   | 7.85              | 15.24         | -1.81             |               | lmo1349 |         | glycine dehydrogenase subunit 1                                                                                   |                                   |
|  | -1.79  | -2.23             | -2.9          |                   | -1.62         | lmo1354 |         | similar to aminopeptidase P                                                                                       |                                   |
|  | -1.26  | -1.24             | 1.17          |                   | 1.48          | lmo1362 |         | exodeoxyribonuclease VII small subunit                                                                            |                                   |
|  | -1.7   | -1.19             | -1.0          |                   | 1.69          | lmo1363 |         | similar to geranyltransferase                                                                                     |                                   |
|  | -1.74  | -1.59             | -1.21         |                   | 1.44          | lmo1364 | cspL    | similar to cold shock protein                                                                                     |                                   |
|  | 1.14   | 1.11              | 2.18          |                   | 1.91          | lmo1368 | recN    | DNA repair and genetic recombination                                                                              |                                   |
|  | 1.32   | 2.74              | 3.36          |                   | 2.07          | 2.54    | lmo1370 |                                                                                                                   | butyrate kinase                   |
|  | 1.32   | 2.48              | 2.15          |                   | 1.63          | lmo1371 |         | dihydroliipoamide dehydrogenase                                                                                   |                                   |
|  | 1.36   | 1.6               | 2.03          |                   | 1.5           | lmo1372 |         | similar to branched-chain alpha-keto acid dehydrogenase E1 subunit (2-oxoisovalerate dehydrogenase alpha subunit) |                                   |
|  | 3.63   | 6.34              | 5.88          |                   | 1.62          | lmo1375 |         | similar to aminotripeptidase                                                                                      |                                   |
|  | -1.21  | 1.06              | 1.17          |                   | 1.42          | lmo1376 |         | 6-phosphogluconate dehydrogenase                                                                                  |                                   |
|  | -1.32  | 1.08              | 1.21          |                   | 1.61          | lmo1379 |         | OxaA-like protein precursor                                                                                       |                                   |
|  | 1.56   | 2.22              | 2.74          |                   | 1.43          | 1.76    | lmo1380 |                                                                                                                   | hypothetical protein lmo1380      |
|  | 1.46   | 3.01              | 2.62          |                   |               | 1.8     | lmo1381 |                                                                                                                   | acylphosphatase                   |
|  | -3.39  | -2.4              | -1.21         |                   |               | 2.8     | lmo1387 |                                                                                                                   | pyrroline-5-carboxylate reductase |
|  | 1.53   | 1.04              | 1.11          | -1.46             |               | lmo1395 |         | hypothetical protein lmo1395                                                                                      |                                   |

| Ln     | L. paracassi + Lm | L. casapi + Lm | L. paracassi + Lm | L. casapi + Lm | Imo     | Gene    | Description                                                                       |
|--------|-------------------|----------------|-------------------|----------------|---------|---------|-----------------------------------------------------------------------------------|
| 1.09   | 1.44              | 4.22           |                   | 3.89           | Imo1397 | cinA    | competence damage-inducible protein A                                             |
| -1.37  | -1.0              | 1.75           |                   | 2.4            | Imo1398 | recA    | recombinase A                                                                     |
| 1.78   | -1.0              | 1.17           | -1.78             |                | Imo1403 | mutS    | DNA mismatch repair protein MutS                                                  |
| -1.39  | 1.14              | 1.8            |                   | 2.5            | Imo1409 |         | similar to multidrug-efflux transporter                                           |
| -1.37  | 1.67              | 1.56           |                   | 2.29           | 2.14    | Imo1413 | peptidoglycan binding protein                                                     |
| 2.1    | 2.6               | 2.98           |                   | 1.42           | Imo1415 |         | similar to hydroxy-3-methylglutaryl coenzyme A synthase                           |
| -5.56  | -3.78             | -2.0           |                   | 2.77           | Imo1416 |         | hypothetical protein Imo1416                                                      |
| -1.42  | 1.07              | 1.73           | 1.51              |                | Imo1423 |         | hypothetical protein Imo1423                                                      |
| -3.79  | -1.07             | -1.09          | 3.55              | 3.49           | Imo1429 |         | hypothetical protein Imo1429                                                      |
| -4.22  | -2.05             | -2.68          | 2.06              |                | Imo1430 |         | hypothetical protein Imo1430                                                      |
| 8.17   | 18.33             | 22.26          |                   | 2.24           | 2.72    | Imo1433 | similar to glutathione reductase                                                  |
| 1.5    | 1.05              | 1.39           | -1.43             |                | Imo1434 |         | hypothetical protein Imo1434                                                      |
| -1.34  | -1.34             | 1.15           |                   | 1.53           | Imo1441 | ispG    | 4-hydroxy-3-methylbut-2-en-1-yl diphosphate synthase                              |
| 1.83   | 2.66              | 3.55           |                   | 1.95           | Imo1453 |         | hypothetical protein Imo1453                                                      |
| 1.63   | 2.25              | 4.82           |                   | 2.95           | Imo1454 | rpoD    | RNA polymerase sigma factor RpoD                                                  |
| 1.99   | 3.36              | 2.86           | 1.69              | 1.44           | Imo1463 |         | similar to cytidine deaminase                                                     |
| 3.28   | 3.34              | 5.22           |                   | 1.59           | Imo1464 |         | similar to diacylglycerol kinase                                                  |
| 3.29   | 4.49              | 4.78           |                   |                | Imo1465 |         | putative metalloprotease                                                          |
| -1.77  | -1.85             | 1.24           |                   | 2.19           | Imo1470 |         | 16S ribosomal RNA methyltransferase RsmE                                          |
| -1.69  | -1.89             | -1.08          |                   | 1.56           | Imo1472 | dnaJ    | chaperone protein DnaJ                                                            |
| 1.85   | 2.74              | 3.54           |                   | 1.91           | Imo1484 | comEA   | similar to integral membrane protein ComEA                                        |
| -3.05  | -2.38             | -1.16          |                   | 2.63           | Imo1491 |         | GTP-binding protein YqeH                                                          |
| 1.29   | 1.37              | 2.41           |                   | 1.87           | Imo1501 |         | hypothetical protein Imo1501                                                      |
| 1.85   | 2.42              | 2.89           |                   | 1.57           | Imo1502 |         | Holliday junction resolvase-like protein                                          |
| 1.72   | 2.26              | 3.03           |                   | 1.77           | Imo1503 |         | hypothetical protein Imo1503                                                      |
| -3.64  | -2.38             | -1.81          |                   | 2.01           | Imo1504 | alaS    | alanyl-tRNA synthetase                                                            |
| 1.66   | 3.3               | 7.14           |                   | 4.3            | Imo1505 |         | similar to ABC transporter, ATP-binding protein                                   |
| 1.92   | 1.9               | 4.17           |                   | 2.17           | Imo1507 |         | similar to two-component response regulators                                      |
| -13.86 | -6.48             | -3.19          |                   | 4.34           | Imo1516 |         | similar to ammonium transporter NrgA                                              |
| -10.63 | -5.72             | -5.1           |                   | 2.08           | Imo1520 | hisS    | histidyl-tRNA synthetase                                                          |
| 2.32   | 1.38              | 1.94           | -1.67             |                | Imo1522 |         | D-tyrosyl-tRNA(Tyr) deacylase                                                     |
| 1.97   | 2.86              | 2.24           | 1.45              |                | Imo1534 |         | similar to L-lactate dehydrogenase                                                |
| 2.08   | 2.01              | 3.0            |                   | 1.44           | Imo1535 |         | hypothetical protein Imo1535                                                      |
| 2.19   | 3.05              | 4.77           |                   | 2.17           | Imo1538 | glpK    | glycerol kinase                                                                   |
| 9.03   | 10.18             | 16.88          |                   | 1.87           | Imo1539 |         | similar to glycerol uptake facilitator                                            |
| -2.28  | -1.64             | -1.46          |                   | 1.56           | Imo1551 | folC    | similar to Folyl-polyglutamate synthetase                                         |
| -1.58  | -2.37             | -3.05          | -1.5              |                | Imo1558 | engB    | ribosome biogenesis GTP-binding protein YsxC                                      |
| 1.99   | 1.05              | 1.96           | -1.89             |                | Imo1561 | dnaB    | chromosome replication initiation / membrane attachment protein DnaB              |
| 1.2    | 1.5               | 1.92           |                   | 1.61           | Imo1570 | pykA    | pyruvate kinase                                                                   |
| 1.91   | 3.71              | 4.05           | 1.95              |                | Imo1575 |         | hypothetical protein Imo1575                                                      |
| 2.4    | 3.44              | 5.21           | 1.44              | 2.17           | Imo1577 |         | metal-dependent hydrolase                                                         |
| -2.82  | -1.84             | 1.04           |                   | 2.93           | Imo1579 |         | similar to alanine dehydrogenase                                                  |
| 3.18   | 6.03              | 8.13           | 1.89              | 2.55           | Imo1580 |         | hypothetical protein Imo1580                                                      |
| 1.17   | 2.16              | 9.08           |                   | 7.75           | Imo1588 | argD    | acetylornithine aminotransferase                                                  |
| -1.01  | 4.01              | 7.38           |                   | 7.44           | Imo1589 | argB    | acetylglutamate kinase                                                            |
| 1.0    | 1.59              | 2.79           |                   | 2.79           | Imo1590 | argJ    | bifunctional ornithine acetyltransferase/N-acetylglutamate synthase protein       |
| 2.97   | 6.65              | 10.1           |                   | 3.4            | Imo1591 | argC    | N-acetyl-gamma-glutamyl-phosphate reductase                                       |
| -1.92  | -1.95             | 1.04           |                   | 1.99           | Imo1595 |         | hypothetical protein Imo1595                                                      |
| 1.55   | 2.78              | 3.62           |                   | 2.35           | Imo1601 |         | similar to general stress protein                                                 |
| 2.43   | 3.25              | 4.28           |                   | 1.76           | Imo1602 |         | hypothetical protein Imo1602                                                      |
| 1.09   | -1.7              | 1.16           | -1.86             |                | Imo1612 |         | hypothetical protein Imo1612                                                      |
| -2.87  | -1.35             | 1.66           | 2.13              | 4.78           | Imo1613 |         | hypothetical protein Imo1613                                                      |
| 1.26   | 1.08              | 2.86           |                   | 2.26           | Imo1618 |         | similar to transcription regulator MarR family                                    |
| -16.47 | -10.78            | -6.91          |                   | 2.38           | Imo1619 | daaA    | D-amino acid aminotransferase                                                     |
| -1.42  | -2.08             | -2.02          | -1.46             |                | Imo1621 |         | weakly similar to E. coli MutT protein (dGTP pyrophosphohydrolase                 |
| -2.92  | -2.17             | -1.46          |                   | 2.0            | Imo1627 | trpA    | tryptophan synthase subunit alpha                                                 |
| 1.8    | 2.39              | 3.4            |                   | 1.89           | Imo1629 | trpF    | N-(5'-phosphoribosyl)anthranilate isomerase                                       |
| 2.15   | 2.36              | 5.99           |                   | 2.79           | Imo1631 | trpD    | anthranilate phosphoribosyltransferase                                            |
| -1.15  | 1.37              | 3.1            |                   | 3.57           | Imo1633 | trpE    | anthranilate synthase component I                                                 |
| 1.07   | 3.12              | 2.39           | 2.91              | 2.23           | Imo1634 |         | bifunctional acetaldehyde-CoA/alcohol dehydrogenase                               |
| 1.38   | 1.81              | 3.28           |                   |                | Imo1638 |         | hypothetical protein Imo1638                                                      |
| 1.02   | 1.57              | 1.91           | 1.54              | 1.87           | Imo1639 |         | similar to dna-3-methyladenine glycosidase                                        |
| 1.32   | 1.51              | 3.99           |                   | 3.03           | Imo1640 |         | hypothetical protein Imo1640                                                      |
| -1.84  | 1.04              | 1.06           |                   | 1.95           | Imo1641 | citB    | aconitate hydratase                                                               |
| 2.28   | 3.04              | 3.52           |                   | 1.54           | Imo1642 |         | similar to putative sigma factor regulator                                        |
| 1.82   | 2.0               | 3.9            |                   | 2.15           | Imo1646 |         | similar to putative exonucleases SbcD                                             |
| 6.44   | 8.04              | 11.58          |                   | 1.8            | Imo1659 |         | hypothetical protein Imo1659                                                      |
| -2.84  | -6.73             | -4.1           | -2.37             |                | Imo1660 | leuS    | leucyl-tRNA synthetase                                                            |
| -1.08  | -1.47             | 1.39           |                   | 1.51           | Imo1662 |         | similar to conserved hypothetical protein                                         |
| 1.96   | 2.72              | 3.26           |                   |                | Imo1666 |         | peptidoglycan linked protein (LPXTG)                                              |
| -1.12  | 1.0               | 1.85           |                   | 2.08           | Imo1674 |         | similar to prolyl aminopeptidases                                                 |
| -1.11  | 1.36              | 1.19           | 1.52              |                | Imo1675 | menD    | 2-succinyl-5-enolpyruvyl-6-hydroxy-3-cyclohexene-1-carboxylate synthase           |
| -8.58  | -3.05             | -2.88          |                   | 2.98           | Imo1682 |         | similar to transmembrane transport proteins                                       |
| 1.49   | 3.27              | 3.02           | 2.2               | 2.03           | Imo1684 |         | similar to glycerate dehydrogenases                                               |
| 1.44   | 2.81              | 5.56           |                   | 3.88           | Imo1694 |         | similar to CDP-abequose synthase                                                  |
| -1.02  | 1.27              | 2.43           |                   | 2.47           | Imo1698 |         | similar to ribosomal-protein-alanine N-acetyltransferase                          |
| 1.16   | 2.09              | 3.01           | 1.79              | 2.58           | Imo1699 |         | some similarities to methyl-accepting chemotaxis proteins                         |
| 1.33   | 1.66              | 2.14           |                   | 1.6            | Imo1703 |         | similar to similar to RNA methyltransferases                                      |
| -12.21 | -22.19            | -5.45          |                   | 2.24           | Imo1707 |         | hypothetical protein Imo1707                                                      |
| 1.75   | 2.09              | 2.74           |                   | 1.57           | Imo1708 |         | similar to aminoglycoside N3'-acetyltransferases                                  |
| 1.02   | 1.65              | 2.18           |                   | 2.14           | Imo1716 |         | similar to putative transcription regulators                                      |
| -2.1   | -1.32             | 1.45           |                   | 1.59           | 3.05    | Imo1718 | similar to putative outer surface protein                                         |
| -1.57  | 1.33              | 3.02           | 2.09              | 4.73           | Imo1719 |         | similar to phosphotransferase system (PTS) lichenan-specific enzyme IIA component |
| -1.12  | 2.17              | 5.5            | 2.42              | 6.15           | Imo1720 |         | similar to phosphotransferase system (PTS) lichenan-specific enzyme IIB component |
| 1.79   | 1.39              | 2.56           |                   | 1.43           | Imo1725 |         | similar to transcriptional regulator (GntR family)                                |
| 1.22   | -1.48             | -1.36          |                   | -1.66          | Imo1726 |         | hypothetical protein Imo1726                                                      |
| 1.83   | 2.53              | 5.89           |                   | 3.22           | Imo1731 |         | similar to sugar ABC transporter, permease protein                                |
| 1.29   | 2.99              | 7.62           |                   | 5.93           | Imo1732 |         | similar to sugar ABC transporter, permease protein                                |
| -3.05  | -2.73             | -1.24          |                   | 2.47           | Imo1735 | gltC    | transcription activator of glutamate synthase operon GltC                         |
| 1.27   | 3.24              | 3.39           |                   | 2.67           | Imo1739 |         | similar to amino acid (glutamine) ABC transporter (ATP-binding protein)           |
| 1.05   | 3.84              | 2.59           |                   | 2.46           | Imo1740 |         | similar to amino acid (glutamine) ABC transporter, permease protein               |
| -2.28  | -2.07             | 1.13           |                   | 2.58           | Imo1744 |         | hypothetical protein Imo1744                                                      |

| Lm     |        |        | L. paracasei + Lm |       |      | L. casei + Lm |      |                                                                                                                     | L. paracasei + Lm |  |  | L. casei + Lm |  |  |
|--------|--------|--------|-------------------|-------|------|---------------|------|---------------------------------------------------------------------------------------------------------------------|-------------------|--|--|---------------|--|--|
| -5.26  | -3.2   | -1.57  |                   |       | 3.35 | lmo1751       |      | Uncharacterized RNA methyltransferase lmo1751                                                                       |                   |  |  |               |  |  |
| -6.15  | -3.05  | -1.65  |                   |       | 3.72 | lmo1752       |      | hypothetical protein lmo1752                                                                                        |                   |  |  |               |  |  |
| -1.32  | -1.92  | -1.68  | -1.46             |       |      | lmo1755       | gatA | aspartyl/glutamyl-tRNA amidotransferase subunit A                                                                   |                   |  |  |               |  |  |
| 1.19   | 1.25   | -1.54  |                   | -1.83 |      | lmo1756       | gatC | aspartyl/glutamyl-tRNA amidotransferase subunit C                                                                   |                   |  |  |               |  |  |
| -1.18  | -1.83  | -1.72  | -1.55             | -1.45 |      | lmo1759       | pcrA | ATP-dependent DNA helicase                                                                                          |                   |  |  |               |  |  |
| -2.24  | -1.74  | -1.06  |                   | 2.1   |      | lmo1761       |      | similar to putative sodium-dependent transporter                                                                    |                   |  |  |               |  |  |
| -1.33  | 1.55   | 1.43   | 2.07              | 1.91  |      | lmo1765       | purH | bifunctional phosphoribosylaminoimidazolecarboxamide formyltransferase/IMP cyclohydrolase                           |                   |  |  |               |  |  |
| -1.3   | -1.14  | 1.34   |                   | 1.74  |      | lmo1767       | purM | phosphoribosylaminoimidazole synthetase                                                                             |                   |  |  |               |  |  |
| -1.28  | 1.41   | 1.51   | 1.81              |       |      | lmo1769       | purQ | phosphoribosylformylglycinamide synthase II                                                                         |                   |  |  |               |  |  |
| -1.82  | 1.14   | 1.01   |                   | 1.84  |      | lmo1771       |      | phosphoribosylformylglycinamide synthase subunit PurS                                                               |                   |  |  |               |  |  |
| 1.25   | 2.29   | 1.66   | 1.84              |       |      | lmo1777       |      | hypothetical protein lmo1777                                                                                        |                   |  |  |               |  |  |
| -1.99  | 1.02   | -1.22  | 2.02              | 1.63  |      | lmo1778       |      | similar to ABC transporter (ATP-binding protein)                                                                    |                   |  |  |               |  |  |
| 1.47   | 3.38   | 4.51   | 2.29              | 3.06  |      | lmo1781       |      | hypothetical protein lmo1781                                                                                        |                   |  |  |               |  |  |
| -3.48  | -3.24  | -2.23  |                   | 1.56  |      | lmo1787       | rplS | 50S ribosomal protein L19                                                                                           |                   |  |  |               |  |  |
| 2.69   | 2.7    | 4.24   |                   | 1.58  |      | lmo1789       |      | weakly similar to Nad(P)h Oxidoreductase chain B                                                                    |                   |  |  |               |  |  |
| 1.47   | 1.4    | 3.06   |                   | 2.08  |      | lmo1790       |      | hypothetical protein lmo1790                                                                                        |                   |  |  |               |  |  |
| 1.68   | 2.81   | 5.04   |                   | 3.01  |      | lmo1791       |      | hypothetical protein lmo1791                                                                                        |                   |  |  |               |  |  |
| 2.12   | 3.07   | 3.73   |                   | 1.76  |      | lmo1792       | trmD | tRNA (guanine-N(1)-)-methyltransferase                                                                              |                   |  |  |               |  |  |
| 2.8    | 4.6    | 4.93   | 1.64              |       |      | lmo1795       |      | hypothetical protein lmo1795                                                                                        |                   |  |  |               |  |  |
| 3.81   | 2.67   | 7.29   |                   | 1.91  |      | lmo1798       |      | hypothetical protein lmo1798                                                                                        |                   |  |  |               |  |  |
| -2.02  | -2.31  | -1.24  |                   | 1.63  |      | lmo1805       | mc   | ribonuclease III                                                                                                    |                   |  |  |               |  |  |
| -1.7   | -2.83  | -2.27  | -1.66             |       |      | lmo1807       | fabG | similar to 3-ketoacyl-acyl carrier protein reductase                                                                |                   |  |  |               |  |  |
| -1.11  | 1.45   | -1.35  | 1.62              |       |      | lmo1812       |      | similar to L-serine dehydratase                                                                                     |                   |  |  |               |  |  |
| -1.19  | 1.02   | 1.45   |                   | 1.73  |      | lmo1813       |      | similar to phosphoglycerate dehydrogenase                                                                           |                   |  |  |               |  |  |
| -1.09  | -1.71  | -1.25  | -1.57             |       |      | lmo1821       |      | similar to putative phosphoprotein phosphatase                                                                      |                   |  |  |               |  |  |
| 2.22   | 1.55   | -1.2   |                   | -2.65 |      | lmo1822       |      | similar to RNA-binding Sun protein                                                                                  |                   |  |  |               |  |  |
| 1.78   | 3.01   | 4.36   |                   | 2.45  |      | lmo1830       |      | short chain dehydrogenase                                                                                           |                   |  |  |               |  |  |
| 1.87   | 2.83   | 5.0    |                   | 2.67  |      | lmo1835       | carB | carbamoyl phosphate synthase large subunit                                                                          |                   |  |  |               |  |  |
| -1.14  | 1.81   | 2.74   |                   | 3.12  |      | lmo1837       | pyrC | dihydroorotase                                                                                                      |                   |  |  |               |  |  |
| -2.55  | -1.19  | 1.99   | 2.13              | 5.07  |      | lmo1839       | pyrP | highly similar to uracil permease                                                                                   |                   |  |  |               |  |  |
| 1.03   | 1.29   | 2.41   |                   | 2.34  |      | lmo1842       |      | hypothetical protein lmo1842                                                                                        |                   |  |  |               |  |  |
| -1.66  | 1.03   | 1.25   |                   | 2.07  |      | lmo1845       |      | hypothetical protein lmo1845                                                                                        |                   |  |  |               |  |  |
| 101    | -50.28 | -28.39 | 2.02              | 3.58  |      | lmo1847       |      | similar to adhesion binding proteins and lipoproteins with multiple specificity for metal cations (ABC transporter) |                   |  |  |               |  |  |
| -31.24 | -28.48 | -10.32 |                   | 3.03  |      | lmo1848       |      | similar metal cations ABC transporter (permease protein)                                                            |                   |  |  |               |  |  |
| 1.14   | 1.51   | 2.41   |                   | 2.12  |      | lmo1851       |      | similar to carboxy-terminal processing proteinase                                                                   |                   |  |  |               |  |  |
| -1.12  | 1.11   | 2.08   |                   | 2.33  |      | lmo1854       |      | hypothetical protein lmo1854                                                                                        |                   |  |  |               |  |  |
| 1.94   | 3.79   | 3.85   |                   | 1.99  |      | lmo1858       |      | similar to dehydrogenases and hypothetical proteins                                                                 |                   |  |  |               |  |  |
| -3.91  | 1.14   | 1.56   | 4.44              | 6.09  |      | lmo1865       |      | hypothetical protein lmo1865                                                                                        |                   |  |  |               |  |  |
| -2.96  | -1.24  | 1.7    | 2.4               |       |      | lmo1866       |      | hypothetical protein lmo1866                                                                                        |                   |  |  |               |  |  |
| 1.82   | 6.41   | 11.49  | 3.52              | 6.3   |      | lmo1867       |      | pyruvate phosphate dikinase                                                                                         |                   |  |  |               |  |  |
| -1.01  | -1.69  | 2.28   |                   | 2.31  |      | lmo1869       |      | similar to conserved hypothetical proteins, putative integral membrane protein                                      |                   |  |  |               |  |  |
| 1.82   | 2.41   | 5.06   |                   | 2.78  |      | lmo1871       |      | similar to phosphoglucomutases                                                                                      |                   |  |  |               |  |  |
| -1.88  | -1.75  | -1.19  |                   | 1.57  |      | lmo1873       |      | similar to dihydrofolate reductases                                                                                 |                   |  |  |               |  |  |
| 8.2    | 29.04  | 25.65  |                   | 3.13  |      | lmo1883       |      | similar to chitinases                                                                                               |                   |  |  |               |  |  |
| -4.71  | -4.49  | -1.32  |                   | 3.55  |      | lmo1884       |      | similar to xanthine permeases                                                                                       |                   |  |  |               |  |  |
| -1.62  | -1.24  | -1.14  |                   |       |      | lmo1892       | pbpA | similar to penicillin-binding protein 2A                                                                            |                   |  |  |               |  |  |
| 2.4    | 4.89   | 4.1    | 2.03              |       |      | lmo1895       | dnaD | similar to chromosome replication initiation protein                                                                |                   |  |  |               |  |  |
| 1.47   | 1.45   | -1.11  |                   | -1.64 |      | lmo1897       | aspB | aspartate aminotransferase                                                                                          |                   |  |  |               |  |  |
| 2.34   | 2.9    | 3.35   |                   | 1.43  |      | lmo1902       | panB | 3-methyl-2-oxobutanoate hydroxymethyltransferase                                                                    |                   |  |  |               |  |  |
| 1.08   | 2.06   | 2.07   |                   | 1.91  |      | lmo1904       | birA | similar to transcriptional regulator and biotin acetyl-CoA-carboxylase synthetase                                   |                   |  |  |               |  |  |
| -1.61  | -1.02  | 1.72   |                   | 2.76  |      | lmo1910       |      | similar to oxidoreductases                                                                                          |                   |  |  |               |  |  |
| 1.11   | 1.77   | 2.13   | 1.6               | 1.93  |      | lmo1912       |      | similar to unknown proteins (hypothetical sensory transduction histidine kinase)                                    |                   |  |  |               |  |  |
| -4.27  | -4.27  | -2.99  |                   | 1.43  |      | lmo1922       |      | hypothetical protein lmo1922                                                                                        |                   |  |  |               |  |  |
| -3.15  | -2.96  | -1.63  |                   | 1.93  |      | lmo1928       | aroF | chorismate synthase                                                                                                 |                   |  |  |               |  |  |
| -1.18  | -1.09  | 1.68   |                   | 1.98  |      | lmo1930       |      | similar to heptaprenyl diphosphate synthase component II (menaquinone biosynthesis)                                 |                   |  |  |               |  |  |
| 1.73   | 2.58   | 3.01   |                   | 1.74  |      | lmo1931       | ubiE | ubiquinone/menaquinone biosynthesis methyltransferase                                                               |                   |  |  |               |  |  |
| 1.81   | 3.28   | 3.29   |                   | 1.81  |      | lmo1932       |      | similar to heptaprenyl diphosphate synthase component I                                                             |                   |  |  |               |  |  |
| 1.1    | 2.21   | 2.56   | 2.01              | 2.34  |      | lmo1933       | folE | GTP cyclohydrolase I                                                                                                |                   |  |  |               |  |  |
| -11.3  | -7.84  | -6.83  |                   | 1.66  |      | lmo1936       | gpsA | NAD(P)H-dependent glycerol-3-phosphate dehydrogenase                                                                |                   |  |  |               |  |  |
| -1.12  | 1.39   | 1.36   |                   | 1.52  |      | lmo1941       |      | hypothetical protein lmo1941                                                                                        |                   |  |  |               |  |  |
| 1.06   | 1.24   | 1.61   |                   | 1.52  |      | lmo1943       |      | hypothetical protein lmo1943                                                                                        |                   |  |  |               |  |  |
| -1.15  | 1.65   | 2.33   | 1.89              | 2.67  |      | lmo1946       |      | similar to similar to acyl-CoA hydrolase                                                                            |                   |  |  |               |  |  |
| -1.6   | -1.15  | 1.02   |                   | 1.63  |      | lmo1948       | resD | similar to two-component response regulator (ResD)                                                                  |                   |  |  |               |  |  |
| -2.38  | -3.7   | -2.12  | -1.56             |       |      | lmo1949       |      | hypothetical protein lmo1949                                                                                        |                   |  |  |               |  |  |
| 1.09   | 2.53   | 11.17  |                   | 10.3  |      | lmo1959       |      | similar to ferrichrome binding protein                                                                              |                   |  |  |               |  |  |
| -1.48  | -1.46  | 1.78   |                   | 2.64  |      | lmo1960       | fhuC | similar to ferrichrome ABC transporter (ATP-binding protein)                                                        |                   |  |  |               |  |  |
| -5.92  | -4.11  | -1.53  |                   | 3.85  |      | lmo1961       |      | similar to oxidoreductases                                                                                          |                   |  |  |               |  |  |
| 1.45   | 2.17   | 2.48   |                   | 1.71  |      | lmo1962       |      | similar to transcription regulators (TetR family)                                                                   |                   |  |  |               |  |  |
| 1.83   | 2.29   | 3.37   |                   | 1.84  |      | lmo1963       |      | hypothetical protein lmo1963                                                                                        |                   |  |  |               |  |  |
| 2.01   | 2.91   | 4.29   | 1.45              | 2.14  |      | lmo1964       |      | similar to ABC transporter, ATP-binding protein                                                                     |                   |  |  |               |  |  |
| -1.63  | -1.21  | 1.65   |                   | 2.69  |      | lmo1965       |      | hypothetical protein lmo1965                                                                                        |                   |  |  |               |  |  |
| 2.13   | 2.29   | 5.0    |                   | 2.35  |      | lmo1968       |      | similar to creatinine amidohydrolases                                                                               |                   |  |  |               |  |  |
| 1.83   | 3.2    | 7.92   |                   | 4.33  |      | lmo1971       | ulaA | PTS system ascorbate-specific transporter subunit IIC                                                               |                   |  |  |               |  |  |
| 1.11   | -1.79  | -1.76  | -1.99             | -1.96 |      | lmo1980       |      | hypothetical protein lmo1980                                                                                        |                   |  |  |               |  |  |
| -10.93 | -2.77  | -2.29  |                   | 4.78  |      | lmo1983       | ilvD | dihydroxy-acid dehydratase                                                                                          |                   |  |  |               |  |  |
| -2.56  | 1.78   | 1.56   |                   | 3.98  |      | lmo1984       | ilvB | similar to acetolactate synthase (acetohydroxy-acid synthase) (large subunit)                                       |                   |  |  |               |  |  |
| -1.31  | -1.92  | 1.44   |                   | 1.88  |      | lmo1985       | ilvH | acetolactate synthase 3 regulatory subunit                                                                          |                   |  |  |               |  |  |
| -4.11  | -3.11  | -1.77  |                   | 2.32  |      | lmo1986       | ilvC | ketol-acid reductoisomerase                                                                                         |                   |  |  |               |  |  |
| 1.66   | 5.31   | 7.02   |                   | 4.22  |      | lmo1987       | leuA | 2-isopropylmalate synthase                                                                                          |                   |  |  |               |  |  |
| 1.23   | 2.06   | 3.63   |                   | 2.95  |      | lmo1988       | leuB | 3-isopropylmalate dehydrogenase                                                                                     |                   |  |  |               |  |  |
| -1.2   | 1.54   | 2.47   |                   | 2.97  |      | lmo1989       | leuC | isopropylmalate isomerase large subunit                                                                             |                   |  |  |               |  |  |
| 1.0    | 1.95   | 3.83   |                   | 3.82  |      | lmo1991       | ilvA | threonine dehydratase                                                                                               |                   |  |  |               |  |  |
| 1.28   | 2.3    | 1.18   | 1.8               |       |      | lmo1994       |      | similar to transcription regulators (LacI family)                                                                   |                   |  |  |               |  |  |
| 1.46   | 2.72   | 1.59   | 1.87              |       |      | lmo1995       | dra  | deoxyribose-phosphate aldolase                                                                                      |                   |  |  |               |  |  |
| 2.05   | 8.23   | 7.81   |                   | 3.81  |      | lmo1997       |      | similar to PTS mannose-specific enzyme IIA component                                                                |                   |  |  |               |  |  |
| 3.49   | 5.32   | 5.7    | 1.53              | 1.64  |      | lmo2000       |      | similar to PTS mannose-specific enzyme IID component                                                                |                   |  |  |               |  |  |
| 2.78   | 5.07   | 5.82   | 1.82              |       |      | lmo2001       |      | similar to PTS mannose-specific enzyme IIC component                                                                |                   |  |  |               |  |  |
| 2.19   | 3.88   | 3.9    |                   | 1.78  |      | lmo2002       |      | similar to PTS mannose-specific enzyme IIB component                                                                |                   |  |  |               |  |  |
| 2.4    | 7.5    | 2.7    | 3.13              |       |      | lmo2003       |      | similar to transcription regulator GntR family                                                                      |                   |  |  |               |  |  |
| 1.8    | 4.06   | 2.95   |                   | 2.25  |      | lmo2004       |      | similar to transcription regulator GntR family                                                                      |                   |  |  |               |  |  |
| -1.05  | 1.01   | 2.57   |                   | 2.7   |      | lmo2005       |      | similar to oxidoreductase                                                                                           |                   |  |  |               |  |  |
| 2.81   | 3.42   | 6.84   |                   | 2.43  |      | lmo2008       |      | similar to putative ABC transporter, permease protein                                                               |                   |  |  |               |  |  |



| Ln    | L. parvasei + Ln | L. casei + Ln | L. parvasei + Ln | L. casei + Ln | Ln      | Ln    | Ln                                                                              |
|-------|------------------|---------------|------------------|---------------|---------|-------|---------------------------------------------------------------------------------|
| 2.86  | 5.93             | 6.64          | 2.07             | 2.33          | Imo2009 |       | similar to putative transport system integral membrane protein                  |
| 1.13  | 1.19             | 2.22          |                  | 1.96          | Imo2011 |       | similar to two-component sensor histidine kinase                                |
| 1.15  | 1.97             | 3.36          |                  | 2.93          | Imo2013 |       | hypothetical protein Imo2013                                                    |
| 2.59  | 2.88             | 8.8           |                  | 3.39          | Imo2014 |       | similar to putative sugar hydrolases                                            |
| 1.42  | 3.37             | 6.33          |                  | 4.46          | Imo2015 |       | similar to alpha-mannosidase                                                    |
| 1.25  | 1.8              | 2.45          |                  | 1.95          | Imo2016 | cspB  | similar to major cold-shock protein                                             |
| -5.13 | -7.62            | -3.63         |                  | 1.41          | Imo2018 | dapF  | diaminopimelate epimerase                                                       |
| 1.02  | 1.31             | 1.88          |                  | 1.85          | Imo2021 |       | hypothetical protein Imo2021                                                    |
| 1.49  | 2.12             | 3.31          |                  | 2.21          | Imo2022 |       | similar to a NifS-like protein required for NAD biosynthesis                    |
| 1.05  | 1.49             | 4.48          |                  | 4.25          | Imo2023 | nadB  | L-aspartate oxidase                                                             |
| 1.26  | 1.37             | 4.34          |                  | 3.43          | Imo2024 | nadC  | nicotinate-nucleotide pyrophosphorylase                                         |
| 2.07  | 3.43             | 8.43          |                  | 4.08          | Imo2025 | nadA  | quinolinate synthetase                                                          |
| 1.05  | 1.77             | 4.12          |                  | 3.93          | Imo2027 |       | putative cell surface protein, internalin proteins                              |
| 1.13  | 1.45             | 1.77          |                  | 1.56          | Imo2029 |       | hypothetical protein Imo2029                                                    |
| 2.65  | 1.92             | 1.48          |                  | -1.79         | Imo2035 | murG  | undecaprenyldiphospho-muramoylpentapeptide beta-N-acetylglucosaminyltransferase |
| 1.45  | -1.05            | -1.22         |                  | -1.77         | Imo2036 | murD  | UDP-N-acetylmuramoyl-L-alanyl-D-glutamate synthetase                            |
| 1.96  | 1.57             | 1.29          |                  | -1.52         | Imo2040 | ftsL  | similar to cell-division protein FtsL                                           |
| -1.99 | -1.35            | 1.37          |                  | 2.72          | Imo2043 |       | similar to integral membrane proteins                                           |
| -1.63 | -1.31            | 1.74          |                  | 2.83          | Imo2049 |       | hypothetical protein Imo2049                                                    |
| -1.32 | -1.19            | 1.27          |                  | 1.68          | Imo2054 |       | hypothetical protein Imo2054                                                    |
| 1.04  | 1.35             | 2.25          |                  | 2.16          | Imo2057 | ctaB  | protoheme IX farnesyltransferase                                                |
| -2.43 | -1.81            | -1.72         |                  | 1.41          | Imo2059 |       | similar to potassium channel subunit                                            |
| 1.18  | 1.83             | 2.35          |                  | 1.99          | Imo2065 |       | hypothetical protein Imo2065                                                    |
| 4.27  | 5.87             | 9.99          |                  | 2.34          | Imo2066 |       | hypothetical protein Imo2066                                                    |
| 9.77  | 14.39            | 22.61         | 1.47             | 2.32          | Imo2067 |       | similar to conjugated bile acid hydrolase                                       |
| -1.25 | 1.62             | 1.9           | 2.02             | 2.37          | Imo2069 | groES | co-chaperonin GroES                                                             |
| -1.21 | 1.6              | 2.11          |                  | 2.56          | Imo2074 |       | hypothetical protein Imo2074                                                    |
| -2.2  | -2.19            | -1.28         |                  | 1.72          | Imo2075 |       | putative DNA-binding/iron metalloprotein/AP endonuclease                        |
| -5.64 | -3.79            | -3.46         | 1.49             | 1.63          | Imo2080 |       | hypothetical protein Imo2080                                                    |
| -1.47 | -1.27            | 1.19          |                  | 1.75          | Imo2082 |       | camphor resistance protein CrcB                                                 |
| -1.25 | 1.02             | 1.31          |                  | 1.64          | Imo2084 |       | hypothetical protein Imo2084                                                    |
| 3.92  | 9.56             | 11.54         | 2.44             | 2.94          | Imo2085 |       | peptidoglycan binding protein                                                   |
| 1.02  | -1.67            | 1.08          |                  | -1.7          | Imo2089 |       | similar to lipases                                                              |
| -1.81 | -1.12            | 1.58          |                  | 2.86          | Imo2091 | argH  | argininosuccinate lyase                                                         |
| -1.19 | -1.2             | 1.22          |                  | 1.45          | Imo2092 | betL  | glycine betaine transporter BetL                                                |
| 1.71  | 5.16             | 4.54          | 3.01             | 2.65          | Imo2093 |       | hypothetical protein Imo2093                                                    |
| 2.25  | 5.42             | 4.19          | 2.41             |               | Imo2097 |       | similar to PTS system galactitol-specific enzyme IIB component                  |
| 3.99  | 6.19             | 13.13         |                  | 3.29          | Imo2098 |       | similar to PTS system galactitol-specific enzyme IIA component                  |
| 5.9   | 10.96            | 16.44         | 1.84             | 2.79          | Imo2099 |       | similar to transcription antiterminator                                         |
| -1.27 | 1.24             | 1.45          |                  | 1.84          | Imo2105 |       | similar to ferrous iron transport protein B                                     |
| -1.06 | -1.2             | 2.01          |                  | 2.13          | Imo2108 |       | similar to N-acetylglucosamine-6-phosphate deacetylase                          |
| 1.83  | 1.74             | 2.79          |                  | 1.52          | Imo2112 |       | hypothetical protein Imo2112                                                    |
| -1.37 | 1.29             | 1.73          | 1.77             | 2.37          | Imo2113 |       | putative heme peroxidase                                                        |
| -1.39 | 1.28             | 2.51          | 1.78             | 3.48          | Imo2115 |       | similar to ABC transporter (permease)                                           |
| -7.04 | -3.24            | -2.02         |                  | 3.49          | Imo2116 |       | hypothetical protein Imo2116                                                    |
| -2.47 | -1.69            | -1.37         |                  | 1.8           | Imo2117 |       | hypothetical protein Imo2117                                                    |
| 2.16  | 3.09             | 9.39          |                  | 4.35          | Imo2121 |       | maltose phosphorylase                                                           |
| 7.88  | 8.81             | 15.31         |                  | 1.94          | Imo2122 |       | similar to maltodextrin utilization protein MalA                                |
| -2.53 | -1.43            | -1.77         | 1.77             | 1.43          | Imo2128 |       | similar to transcription regulator, LacI family                                 |
| 1.17  | 2.27             | 3.14          |                  | 2.68          | Imo2131 |       | hypothetical protein Imo2131                                                    |
| 1.26  | 2.24             | 2.87          | 1.79             | 2.29          | Imo2132 |       | hypothetical protein Imo2132                                                    |
| 4.32  | 7.3              | 11.91         |                  | 2.76          | Imo2134 |       | similar to fructose-1,6-biphosphate aldolase type II                            |
| 5.24  | 9.32             | 14.69         |                  | 2.8           | Imo2135 |       | similar to PTS system, fructose-specific enzyme IIC component                   |
| 2.29  | 3.56             | 7.71          |                  | 3.36          | Imo2137 |       | similar to PTS system, fructose-specific enzyme IIA component                   |
| 2.43  | 3.24             | 4.82          |                  | 1.99          | Imo2140 |       | similar to ABC transporter (membrane protein)                                   |
| -3.82 | -2.68            | -1.63         |                  | 2.35          | Imo2145 |       | hypothetical protein Imo2145                                                    |
| 3.38  | 2.69             | 1.56          |                  | -2.16         | Imo2154 | nrpF  | ribonucleotide-diphosphate reductase subunit beta                               |
| 2.66  | 3.61             | 4.74          |                  | 1.78          | Imo2157 | sepA  | hypothetical protein Imo2157                                                    |
| 2.91  | 6.05             | 4.78          | 2.08             |               | Imo2158 |       | similar to B. subtilis YwmG protein                                             |
| 1.16  | -1.53            | -1.77         |                  | -2.06         | Imo2165 |       | similar to transcription regulator CRP/FNR family                               |
| 5.7   | 6.93             | 8.42          |                  | 1.48          | Imo2170 |       | hypothetical protein Imo2170                                                    |
| 1.42  | 3.67             | 7.32          | 2.58             | 5.15          | Imo2171 |       | similar to antiporter proteins                                                  |
| 2.31  | 2.69             | 5.06          |                  | 2.19          | Imo2172 |       | similar to propionate CoA-transferase                                           |
| 2.86  | 3.65             | 5.69          |                  | 1.99          | Imo2174 |       | hypothetical protein Imo2174                                                    |
| -1.72 | 1.2              | 1.36          | 2.07             |               | Imo2177 |       | hypothetical protein Imo2177                                                    |
| 2.56  | 5.64             | 12.79         | 2.2              | 5.0           | Imo2178 |       | peptidoglycan binding protein                                                   |
| 1.56  | 2.97             | 2.54          |                  | 1.63          | Imo2180 |       | hypothetical protein Imo2180                                                    |
| -1.5  | 1.28             | 2.04          |                  | 3.07          | Imo2181 |       | hypothetical protein Imo2181                                                    |
| -6.34 | -1.98            | -1.01         |                  | 6.28          | Imo2186 |       | hypothetical protein Imo2186                                                    |
| -1.15 | -1.13            | 1.37          |                  | 1.58          | Imo2187 |       | hypothetical protein Imo2187                                                    |
| 1.62  | 1.91             | 2.31          |                  | 1.42          | Imo2191 | spxA  | transcriptional regulator Spx                                                   |
| -3.84 | -4.11            | -1.51         |                  | 2.54          | Imo2197 |       | hypothetical protein Imo2197                                                    |
| -4.96 | -2.84            | 1.17          |                  | 5.78          | Imo2198 | trpS  | tryptophanyl-tRNA synthetase                                                    |
| -2.42 | -1.01            | -1.16         | 2.4              |               | Imo2200 |       | similar to transcription regulator                                              |
| 1.33  | 1.69             | 2.08          |                  | 1.57          | Imo2204 |       | hypothetical protein Imo2204                                                    |
| 2.56  | 3.93             | 5.9           | 1.54             | 2.31          | Imo2205 |       | similar to phosphoglyceromutase 1                                               |
| 3.33  | 5.2              | 7.06          | 1.56             | 2.12          | Imo2206 | clpB  | similar to endopeptidase Clp ATP-binding chain B (ClpB)                         |
| -7.22 | -5.02            | -2.54         |                  | 2.84          | Imo2209 |       | hypothetical protein Imo2209                                                    |
| -2.36 | -1.51            | -1.77         | 1.56             |               | Imo2212 | hemE  | uroporphyrinogen decarboxylase                                                  |
| 2.53  | 2.88             | 4.66          |                  | 1.84          | Imo2213 |       | hypothetical protein Imo2213                                                    |
| -1.27 | 1.24             | 1.09          | 1.58             |               | Imo2214 |       | similar to ABC transporter (membrane protein)                                   |
| -1.24 | 1.4              | 1.01          | 1.74             |               | Imo2216 |       | similar to histidine triad (HIT) protein                                        |
| -2.43 | -1.26            | -1.58         |                  | 1.54          | Imo2217 |       | hypothetical protein Imo2217                                                    |
| 1.25  | 1.8              | 5.36          |                  | 4.28          | Imo2226 |       | hypothetical protein Imo2226                                                    |
| -1.24 | 1.68             | 2.08          |                  | 2.57          | Imo2227 |       | similar to ABC transporter (ATP-binding protein)                                |
| 2.39  | 3.5              | 4.77          |                  | 2.0           | Imo2230 |       | similar to arsenate reductase                                                   |
| 1.18  | 1.44             | 2.53          |                  | 2.15          | Imo2233 |       | similar to transcriptional regulators (LysR family)                             |
| 3.16  | 6.96             | 12.36         |                  | 3.91          | Imo2236 |       | shikimate 5-dehydrogenase                                                       |
| 2.68  | 3.82             | 8.0           |                  | 2.98          | Imo2237 |       | similar to transport system permease protein                                    |
| 2.37  | -1.04            | 1.98          | -2.46            |               | Imo2239 |       | hypothetical protein Imo2239                                                    |
| 1.34  | 2.11             | 7.48          |                  | 5.59          | Imo2242 |       | similar to O6-methylguanine-DNA methyltransferase                               |
| -3.5  | -3.64            | -1.62         |                  | 2.16          | Imo2245 |       | hypothetical protein Imo2245                                                    |

|       | Ln    | L. paracasei + Ln | L. casei + Ln | L. paracasei + Ln | L. casei + Ln |         |                                                                                                 |
|-------|-------|-------------------|---------------|-------------------|---------------|---------|-------------------------------------------------------------------------------------------------|
| 1.05  | 1.59  | 2.18              |               |                   | 2.08          | lmo2247 | similar to oxidoreductase                                                                       |
| -1.83 | 1.05  | 1.28              |               | 1.91              | 2.34          | lmo2251 | similar to amino acid ABC transporter (ATP-binding protein)                                     |
| -2.05 | -1.03 | 1.89              |               | 2.0               | 3.87          | lmo2256 | hypothetical protein lmo2256                                                                    |
| 1.11  | 1.17  | 1.66              |               |                   | 1.49          | lmo2257 | hypothetical protein lmo2257                                                                    |
| 1.93  | 1.26  | 1.11              |               |                   | -1.73         | lmo2258 | hypothetical protein lmo2258                                                                    |
| -3.31 | -2.61 | -1.85             |               |                   | 1.78          | lmo2261 | hypothetical protein lmo2261                                                                    |
| -2.66 | -2.18 | -1.39             |               |                   | 1.91          | lmo2262 | hypothetical protein lmo2262                                                                    |
| -3.22 | -1.67 | -1.56             |               | 1.93              | 2.06          | lmo2263 | similar to unknown proteins                                                                     |
| 1.59  | 2.63  | 1.89              |               | 1.66              |               | lmo2266 | hypothetical protein lmo2266                                                                    |
| -1.18 | -1.03 | 1.28              |               |                   | 1.51          | lmo2268 | addB similar to ATP-dependent deoxyribonuclease (subunit B)                                     |
| -1.88 | -1.46 | 1.75              |               |                   | 3.29          | lmo2269 | hypothetical protein lmo2269                                                                    |
| -2.37 | -1.36 | -1.08             |               |                   | 2.2           | lmo2270 | comK' similar to competence transcription factor ComK, N terminal part                          |
| -1.66 | -1.09 | 1.71              |               |                   | 2.83          | lmo2272 | hypothetical protein lmo2272                                                                    |
| 2.07  | 1.18  | 1.82              |               | -1.75             |               | lmo2274 | protein gp29                                                                                    |
| 2.05  | 2.78  | 4.89              |               |                   | 2.38          | lmo2275 | protein gp28                                                                                    |
| -3.14 | -2.01 | -1.67             |               |                   | 1.88          | lmo2277 | hypothetical protein lmo2277                                                                    |
| 3.82  | 5.81  | 7.71              |               |                   | 2.02          | lmo2278 | lysA L-alanyl-D-glutamate peptidase                                                             |
| 2.18  | 1.48  | 3.34              |               |                   | 1.53          | lmo2280 | protein gp23                                                                                    |
| 1.37  | 1.46  | 3.19              |               |                   | 2.33          | lmo2282 | protein gp21                                                                                    |
| 3.45  | 3.84  | 7.66              |               |                   | 2.22          | lmo2290 | protein gp13                                                                                    |
| 1.57  | 2.88  | 5.9               |               |                   | 3.75          | lmo2300 | putative terminase large subunit from bacteriophage A118                                        |
| 1.55  | 1.85  | 3.36              |               |                   | 2.17          | lmo2304 | bacteriophage A118 gp65 protein                                                                 |
| -1.0  | 1.33  | 1.56              |               |                   | 1.56          | lmo2334 | similar to transcriptional regulator                                                            |
| 1.75  | -2.43 | 1.08              |               | -4.25             |               | lmo2335 | fruA highly similar to phosphotransferase system (PTS) fructose-specific enzyme IIA/B component |
| 5.6   | 1.36  | 3.96              |               | -4.11             |               | lmo2336 | fruB fructose-1-phosphate kinase                                                                |
| 3.09  | -1.86 | 1.62              |               | -5.76             |               | lmo2337 | similar to regulatory protein DeoR family                                                       |
| -1.83 | -1.21 | 1.25              |               |                   | 2.28          | lmo2338 | pepC aminopeptidase C                                                                           |
| -1.02 | 1.18  | 2.09              |               |                   | 2.14          | lmo2342 | similar to 16S pseudouridylylase synthase                                                       |
| -2.68 | -1.36 | 1.38              |               |                   | 3.71          | lmo2343 | similar to nitrotriacetate monooxygenase                                                        |
| -2.41 | 1.21  | 1.76              |               | 2.9               | 4.23          | lmo2345 | hypothetical protein lmo2345                                                                    |
| -1.75 | 1.8   | 3.68              |               | 3.16              | 6.45          | lmo2346 | similar to amino acid ABC-transporter, ATP-binding protein                                      |
| -1.58 | 1.05  | 1.39              |               | 1.66              | 2.19          | lmo2347 | similar to amino acid ABC transporter (permease)                                                |
| 2.45  | 2.69  | 6.24              |               |                   | 2.55          | lmo2348 | similar to amino acid ABC-transporter (permease)                                                |
| -2.3  | -1.06 | 3.02              |               |                   | 8.95          | lmo2350 | similar to B. subtilis YtmI protein                                                             |
| -2.63 | 1.09  | -1.09             |               | 2.85              | 2.41          | lmo2351 | similar to NADH-dependent FMN reductase                                                         |
| -1.14 | -1.23 | 1.97              |               |                   | 2.26          | lmo2354 | hypothetical protein lmo2354                                                                    |
| -2.94 | -2.93 | -1.44             |               |                   | 2.04          | lmo2355 | Similar to multidrug resistance protein                                                         |
| -1.07 | 1.61  | 2.69              |               | 1.73              | 2.89          | lmo2356 | hypothetical protein lmo2356                                                                    |
| 4.21  | 16.02 | 21.62             |               |                   | 5.14          | lmo2362 | similar to amino acid antiporter (acid resistance)                                              |
| 4.39  | 5.77  | 10.1              |               |                   | 2.3           | lmo2363 | similar to glutamate decarboxylase                                                              |
| 1.66  | 1.31  | 2.62              |               |                   | 1.58          | lmo2370 | similar to aminotransferase                                                                     |
| 1.11  | 1.59  | 1.61              |               |                   | 1.45          | lmo2373 | similar to phosphotransferase system (PTS) beta-glucoside-specific enzyme IIB component         |
| -2.86 | -2.43 | -1.77             |               |                   | 1.62          | lmo2376 | similar to peptidyl-prolyl cis-trans isomerase                                                  |
| -1.16 | 1.29  | 1.79              |               | 1.5               | 2.07          | lmo2379 | putative monovalent cation/H+ antiporter subunit B                                              |
| -1.21 | 1.08  | 1.5               |               |                   | 1.83          | lmo2382 | putative monovalent cation/H+ antiporter subunit E                                              |
| 1.1   | 1.27  | 1.64              |               |                   | 1.48          | lmo2383 | putative monovalent cation/H+ antiporter subunit F                                              |
| -1.71 | -1.36 | 1.47              |               |                   | 2.51          | lmo2384 | putative monovalent cation/H+ antiporter subunit G                                              |
| 1.02  | 1.39  | 2.02              |               |                   | 1.98          | lmo2386 | similar to B. subtilis YuiD protein                                                             |
| 3.19  | 5.7   | 4.9               |               | 1.79              | 1.53          | lmo2387 | hypothetical protein lmo2387                                                                    |
| -1.22 | 1.12  | 1.19              |               |                   | 1.45          | lmo2388 | similar to B. subtilis YwqG protein                                                             |
| -9.85 | -9.64 | -4.96             |               |                   | 1.99          | lmo2390 | similar to hypothetical thioredoxine reductase                                                  |
| 2.32  | 6.89  | 10.42             |               | 2.97              | 4.49          | lmo2391 | conserved hypothetical protein similar to B. subtilis YhfK protein                              |
| -1.71 | 1.07  | 1.4               |               | 1.83              | 2.4           | lmo2393 | similar to B. subtilis YuzD protein                                                             |
| 3.86  | 6.89  | 9.31              |               |                   | 2.41          | lmo2395 | hypothetical protein lmo2395                                                                    |
| 1.31  | 3.15  | 3.37              |               | 2.41              | 2.57          | lmo2396 | similar to internalin proteins, putative peptidoglycan bound protein (LPXTG motif)              |
| -1.12 | 1.22  | 1.38              |               |                   | 1.54          | lmo2398 | ltrC hypothetical protein lmo2398                                                               |
| 1.23  | 2.96  | 4.5               |               | 2.4               | 3.65          | lmo2399 | hypothetical protein lmo2399                                                                    |
| -1.14 | -1.17 | 1.42              |               |                   | 1.61          | lmo2401 | similar to conserved hypothetical protein and to B. subtilis YutF protein                       |
| -1.16 | 1.26  | 1.58              |               | 1.46              | 1.84          | lmo2403 | similar to B. subtilis YunD protein                                                             |
| 1.16  | 1.3   | 1.8               |               |                   | 1.56          | lmo2406 | similar to B. subtilis YunF protein                                                             |
| -2.25 | -2.32 | 1.27              |               |                   | 2.84          | lmo2408 | similar to repressor protein                                                                    |
| -1.48 | -2.15 | -2.13             |               |                   | -1.44         | lmo2418 | similar to ABC transporter, permease protein                                                    |
| -3.93 | -3.16 | -2.14             |               |                   | 1.83          | lmo2420 | hypothetical protein lmo2420                                                                    |
| 1.17  | 1.54  | 2.04              |               |                   | 1.75          | lmo2424 | similar to thioredoxin                                                                          |
| -1.02 | 1.22  | 1.45              |               |                   | 1.47          | lmo2425 | glycine cleavage system protein H                                                               |
| 1.23  | 2.28  | 7.91              |               | 1.86              | 6.46          | lmo2432 | hypothetical protein lmo2432                                                                    |
| 7.96  | -3.63 | -1.47             |               | 2.19              | 5.41          | lmo2433 | similar to acetyltransferase                                                                    |
| 4.23  | 6.21  | 10.29             |               |                   | 2.43          | lmo2434 | highly similar to glutamate decarboxylases                                                      |
| 1.75  | 2.16  | 2.73              |               |                   | 1.57          | lmo2442 | hypothetical protein lmo2442                                                                    |
| -7.89 | -3.21 | -2.05             |               |                   | 3.85          | lmo2443 | hypothetical protein lmo2443                                                                    |
| 2.05  | 2.47  | 4.82              |               |                   | 2.35          | lmo2445 | similar to internalin                                                                           |
| -1.04 | 1.29  | 2.14              |               |                   | 2.23          | lmo2447 | similar to transcription regulator                                                              |
| 1.34  | 2.78  | 2.79              |               |                   | 2.09          | lmo2448 | smpB SsrA-binding protein                                                                       |
| -1.16 | 1.53  | 1.55              |               |                   | 1.8           | lmo2449 | similar to exoribonuclease RNase-R                                                              |
| -1.37 | -1.52 | 1.26              |               |                   | 1.73          | lmo2450 | similar to carboxylesterase                                                                     |
| 1.18  | 1.21  | 2.59              |               |                   | 2.2           | lmo2452 | similar to carboxylesterase                                                                     |
| 2.4   | 6.11  | 8.06              |               | 2.55              | 3.36          | lmo2453 | similar to lipolytic enzyme                                                                     |
| 5.95  | 10.51 | 16.42             |               |                   | 2.76          | lmo2454 | hypothetical protein lmo2454                                                                    |
| -1.56 | -1.16 | 1.18              |               |                   | 1.84          | lmo2455 | eno phosphopyruvate hydratase                                                                   |
| -1.94 | -1.21 | 1.07              |               | 1.6               | 2.07          | lmo2456 | pgm phosphoglyceromutase                                                                        |
| -1.81 | -1.03 | 1.17              |               | 1.76              | 2.12          | lmo2457 | tpiA triosephosphate isomerase                                                                  |
| -1.39 | -1.04 | 1.44              |               |                   |               | lmo2458 | pgk phosphoglycerate kinase                                                                     |
| -2.61 | -1.66 | -1.35             |               | 1.58              | 1.94          | lmo2459 | gap glyceraldehyde-3-phosphate dehydrogenase                                                    |
| -2.71 | -1.47 | -1.4              |               | 1.85              | 1.94          | lmo2460 | similar to B. subtilis CggR hypothetical transcriptional regulator                              |
| 1.49  | 2.47  | 4.87              |               | 1.65              |               | lmo2463 | similar to transport protein                                                                    |
| -2.2  | -1.81 | -1.49             |               |                   | 1.48          | lmo2465 | hypothetical protein lmo2465                                                                    |
| -3.75 | -1.42 | 1.08              |               | 2.64              |               | lmo2466 | hypothetical protein lmo2466                                                                    |
| 1.42  | 2.8   | 1.56              |               | 1.97              |               | lmo2467 | similar to chitinase and chitin binding protein                                                 |
| 1.02  | 2.66  | 6.07              |               | 2.6               | 5.95          | lmo2470 | similar to internalin proteins                                                                  |
| -1.03 | 1.12  | 1.4               |               |                   | 1.44          | lmo2485 | similar to B. subtilis yvlC protein                                                             |
| -2.11 | -3.24 | -3.35             |               | -1.59             |               | lmo2489 | uvrB excinuclease ABC subunit B                                                                 |
| -4.29 | -2.99 | -2.42             |               |                   | 1.77          | lmo2490 | similar to B. subtilis CsbA protein                                                             |



|  | Lm    | L. paracasei + Lm | L. casei + Lm | L. paracasei + Lm | L. casei + Lm |         |      |                                                                  |
|--|-------|-------------------|---------------|-------------------|---------------|---------|------|------------------------------------------------------------------|
|  | 1.31  | 2.58              | 1.86          | 1.98              |               | Imo2810 | gidA | tRNA uridine 5-carboxymethylaminomethyl modification enzyme GidA |
|  | -1.81 | -1.35             | 1.62          |                   | 2.94          | Imo2814 |      | similar to transcriptional regulator                             |
|  | 2.29  | 2.94              | 5.01          |                   | 2.19          | Imo2817 |      | similar to peptidases                                            |
|  | 2.25  | 5.09              | 7.7           | 2.27              | 3.42          | Imo2818 |      | similar to transmembrane efflux protein                          |
|  | 3.17  | 4.44              | 6.21          |                   | 2.59          | Imo2819 |      | similar to carboxypeptidase                                      |
|  | -8.39 | -7.0              | -5.03         |                   | 1.67          | Imo2822 |      | hypothetical protein Imo2822                                     |
|  | -1.27 | 1.35              | 3.08          |                   | 3.91          | Imo2823 |      | similar to an hypothetical protein from Thermotoga maritima      |
|  | -3.21 | -5.26             | -2.06         | -1.64             | 1.56          | Imo2824 |      | similar to D-3-phosphoglycerate dehydrogenase                    |
|  | -4.19 | -2.47             | -2.13         |                   | 1.97          | Imo2825 | serC | phosphoserine aminotransferase                                   |
|  | -2.31 | 1.24              | 1.47          | 2.85              | 3.39          | Imo2826 |      | similar to efflux proteins                                       |
|  | -3.79 | -2.31             | -1.18         |                   | 3.22          | Imo2830 |      | similar to thioredoxin                                           |
|  | 1.34  | 2.27              | 2.7           |                   | 2.02          | Imo2833 |      | similar to a maltose phosphorylase                               |
|  | 1.18  | 6.06              | 5.67          | 5.12              | 4.79          | Imo2834 |      | similar to oxidoreductases                                       |
|  | 1.23  | 1.79              | 4.41          |                   | 3.58          | Imo2838 |      | similar to sugar ABC transporter permease protein                |
|  | 1.24  | 2.86              | 3.21          |                   | 2.59          | Imo2840 |      | similar to Sucrose phosphorylase                                 |
|  | -3.02 | -3.49             | -1.81         |                   | 1.67          | Imo2844 |      | hypothetical protein Imo2844                                     |
|  | 4.45  | 10.4              | 15.93         | 2.34              | 3.58          | Imo2846 |      | highly similar to B. subtilis YulD protein                       |
|  | 6.39  | 8.46              | 16.67         |                   | 2.61          | Imo2848 |      | L-rhamnose isomerase                                             |
|  | 3.2   | 6.03              | 12.51         |                   | 3.91          | Imo2849 |      | similar to rhamnulokinase                                        |
|  | 4.94  | 8.33              | 11.99         |                   | 2.43          | Imo2850 |      | similar to sugar transport proteins                              |
|  | -1.51 | 1.43              | 2.65          |                   | 4.0           | Imo2852 |      | hypothetical protein Imo2852                                     |
|  | 1.6   | -1.1              | 1.42          | -1.76             |               | Imo2853 |      | highly similar to B. subtilis Jag protein                        |
|  | -5.05 | -5.26             | -3.23         |                   | 1.56          | Imo2856 | rpmH | 50S ribosomal protein L34                                        |
|  | -2.12 | -1.78             | -1.16         |                   | 1.83          | Imo2857 |      | hypothetical protein Imo2857                                     |
