# Supplementary material
Source: PubMed Central journal article supplement (PMC3478606)

**Figure S1**

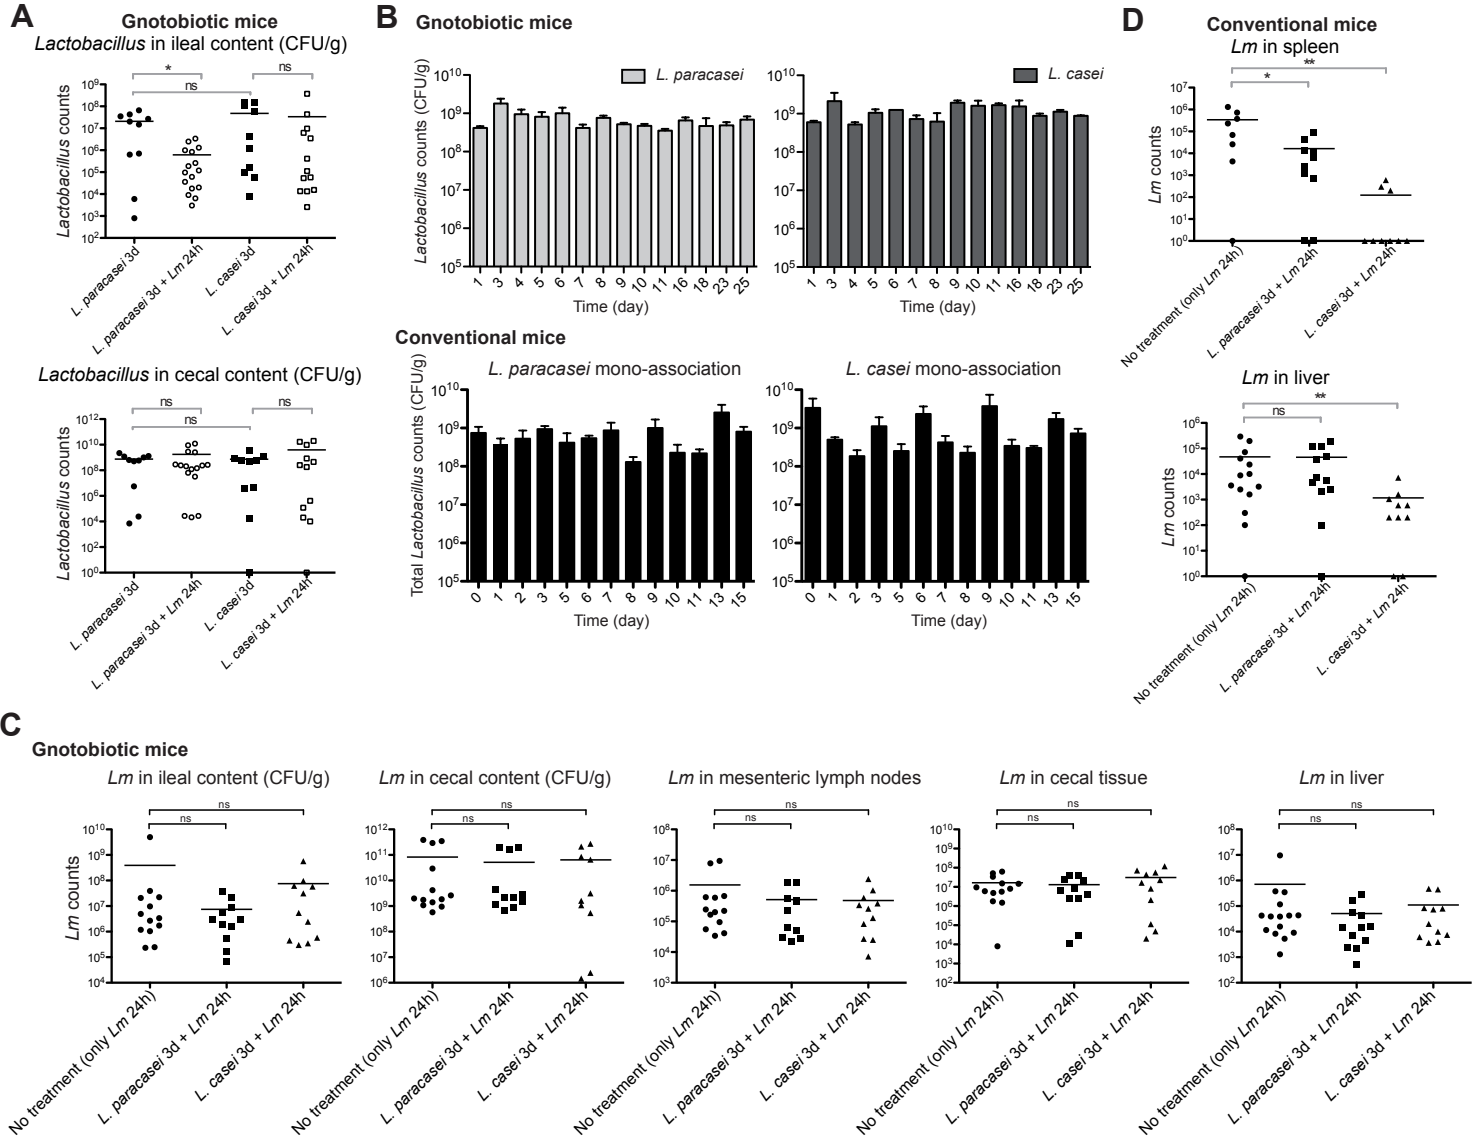

Supplement: 1212809109_sfig01.pdf [file 1212809109_sfig01.pdf]

**Figure S2**

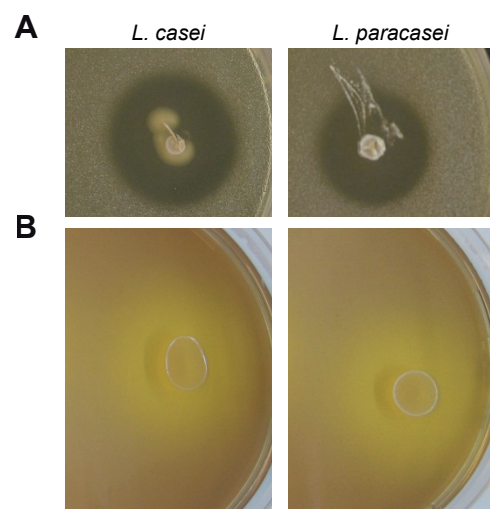

Supplement: 1212809109_sfig02.pdf [file 1212809109_sfig02.pdf]

**Figure S5**

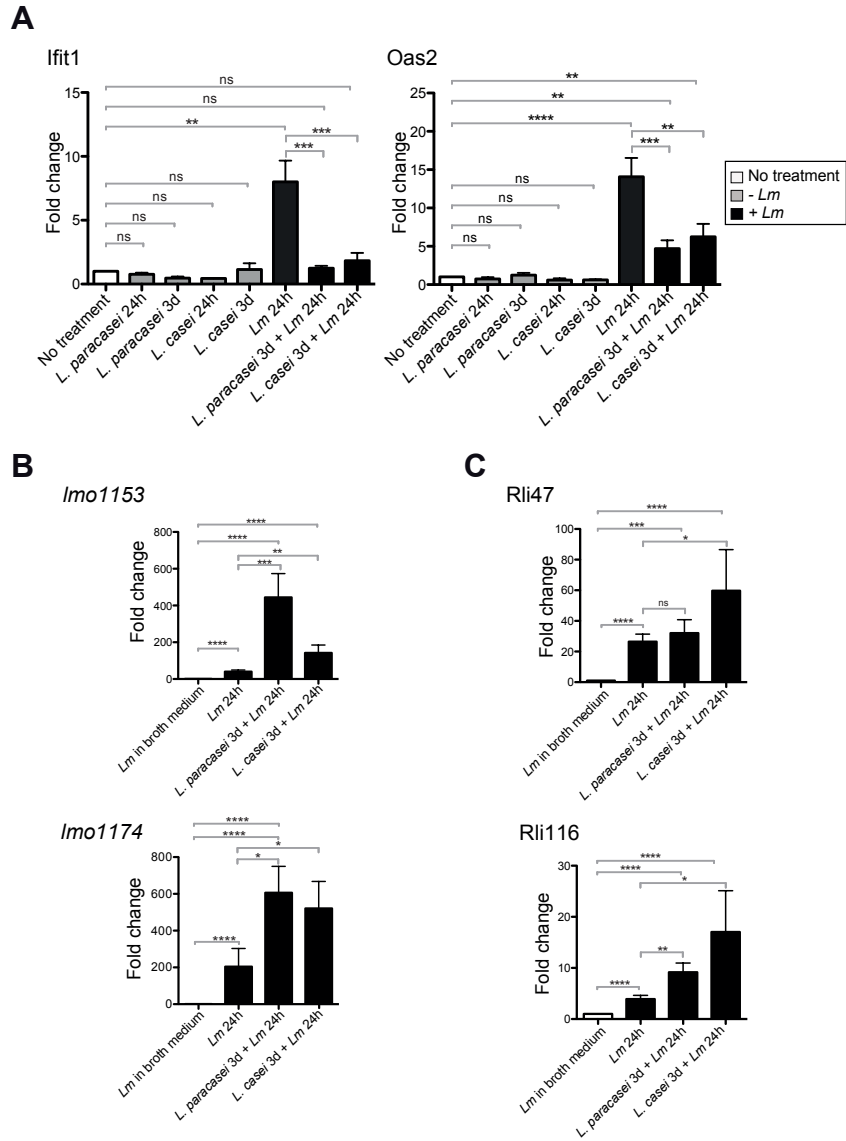

Supplement: 1212809109_sfig05.pdf [file 1212809109_sfig05.pdf]

Figure S8

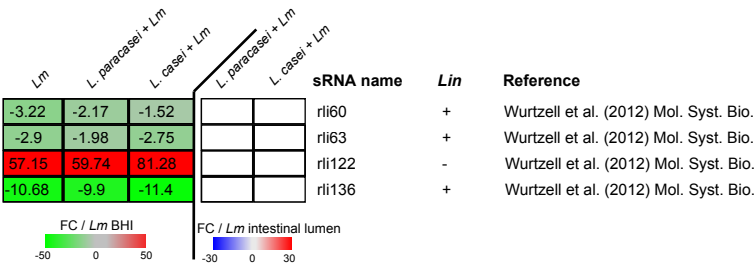

Supplement: 1212809109_sfig08.pdf [file 1212809109_sfig08.pdf]

Figure S9

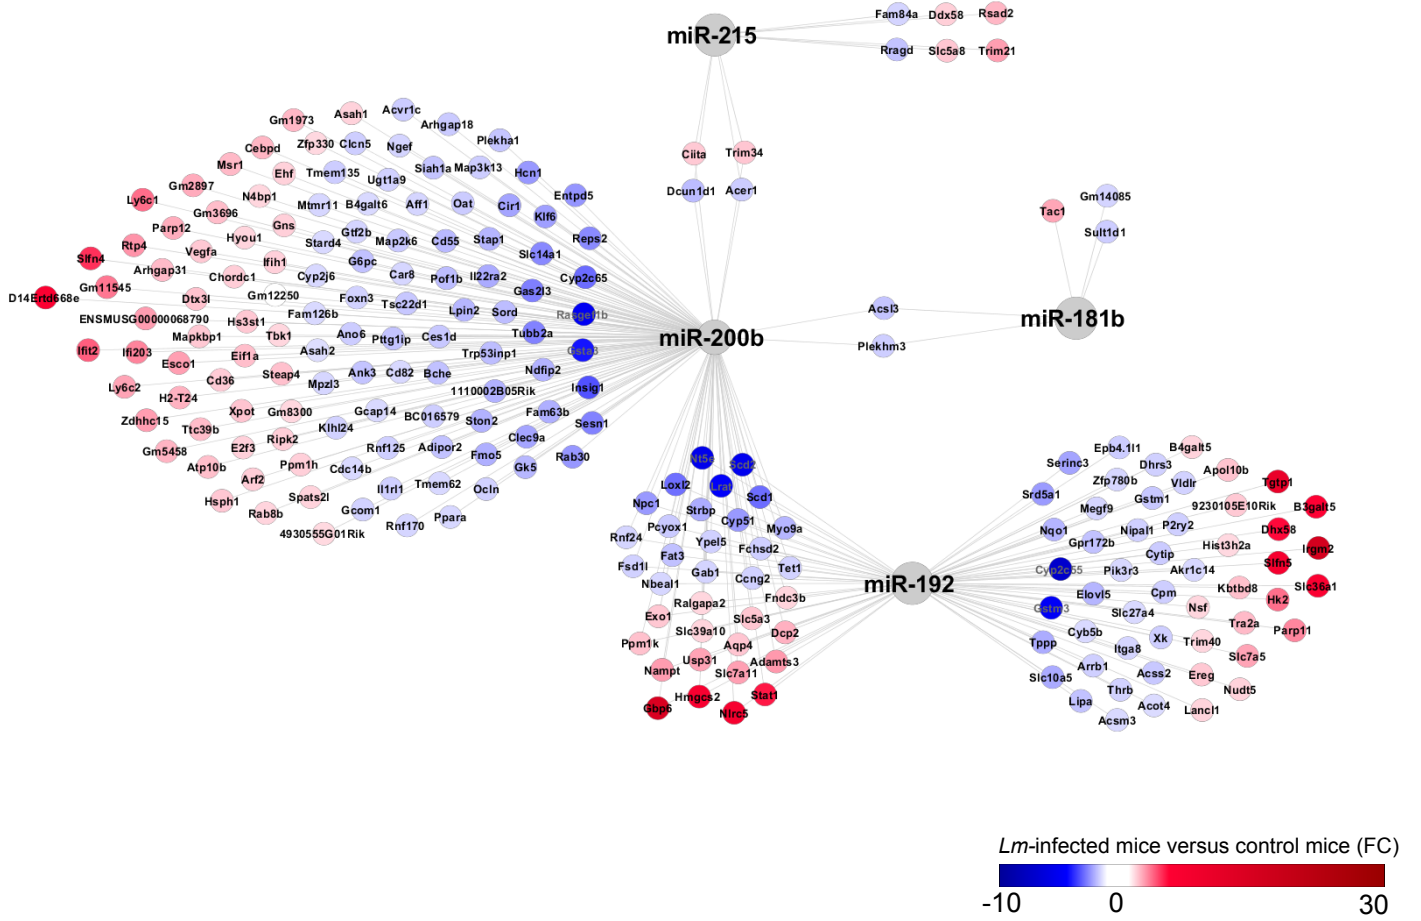

Supplement: 1212809109_sfig09.pdf [file 1212809109_sfig09.pdf]
